# Supplementary material for: Deciphering Complex Regions within the Human Genome and Unraveling Their Critical Biomedical Regulatory Functions
Source: Research Square preprint supplement (doi:10.21203/rs.3.rs-4800291/v1), 2024-08-07
Supplement: Supplementary file 1 [file 39c6d7672c790f123332e43e.xlsx]

## Sheet: ALL
Supplementary Table 1. The DNA sequence classification performance using fine-turned models. Supplementary Table 2. The distribution of regional fragments at the chromosome level. Supplementary Table 3. The summary of enrichment results in PaGenBase by using genes within Non-Complex_Region as a reference for Complex_Region genes in each chromosome of the human genome. Supplementary Table 4. The t…

## Sheet: Supplementary Table1
Supplementary Table 1. The DNA sequence classification performance using fine-turned models.
	Database	Model	Acc	F1	Loss	Precision	Recall	Auroc	Pr_auc	MCC	Time
Binary Classification	Complex_region	A	0.8679±0.0002	0.8930±0.0009	0.2310±0.0013	0.8967±0.0058	0.8896±0.0074	0.9579±0.0008	0.9758±0.0005	0.7207±0.0013	3.3840±0.0106
		B	0.8700±0.0017	0.8959±0.0008	0.2261±0.0006	0.8893±0.0092	0.9030±0.0096	0.9601±0.0005	0.9770±0.0003	0.7234±0.0047	9.5844±0.0136
	Random	A	0.5205±0.0031	0.6503±0.0118	0.6953±0.0008	0.5299±0.0006	0.8436±0.0384	0.4983±0.0021	0.5296±0.0006	-0.0003±0.0026	0.7690±0.0038
		B	0.5134±0.0059	0.5895±0.0242	0.7010±0.0014	0.5327±0.0019	0.6656±0.0606	0.4997±0.0012	0.5290±0.0014	0.0085±0.0067	2.4468±0.0038
Multi-classification	Complex_region	A	0.7942±0.0028	0.8003±0.0019	0.4541±0.0054	0.8227±0.0022	0.7942±0.0028	0.8593±0.0008	0.7074±0.0007	0.7243±0.0023	3.6595±0.0065
		B	0.8016±0.0026	0.8074±0.0019	0.4422±0.0062	0.8321±0.0039	0.8016±0.0026	0.8646±0.0011	0.7175±0.0014	0.7359±0.0023	10.1814±0.2728
	Random	A	0.2864±0.012	0.2793±0.0025	1.3934±0.0011	0.2881±0.0053	0.2864±0.0126	0.4952±0.0038	0.2935±0.0014	-0.0109±0.0074	0.7665±0.0030
		B	0.3321±0.0095	0.2984±0.0071	1.3955±0.0029	0.2992±0.0018	0.3321±0.0095	0.5019±0.0009	0.2969±0.0004	0.0052±0.0018	2.4553±0.0020
A represents the DNA_bert_6 model; B represents the human_gpt2-v1 model. As for the Complex_region dataset, the labels are (Non_Complex-Region","Complex-Region") for the binary Classification and ("Non_Complex-Region_Coding","Complex-Region_Coding","Non_Complex-Region_Non-Coding","Complex-Region_Non-Coding") for the multi-classification.

## Sheet: Supplementary Table2
Supplementary Table 2. The distribution of regional fragments at the chromosome level.
Chromesome (hg38)	Complex_Region(Mb)		CMRG_v1.00_HG002
	Max_Length	Accumulated_length	Max_Length	Accumulated_length
1	3.558	23.623	0.11902	0.828908
2	2.5795	21.755	0.571804	1.08323
3	2.0365	9.99351	0.212655	0.753261
4	1.3435	9.01351	0.138929	0.634336
5	5.0905	14.1985	0.156465	0.621347
6	4.5835	21.5305	0.232295	0.520509
7	1.922	11.471	0.301084	1.13877
8	2.9025	13.619	0.134716	0.331132
9	3.549	11.564	0.153352	0.520282
10	1.496	6.00351	0.203289	0.639291
11	5.4325	12.6095	0.087385	0.277723
12	4.0365	12.6955	0.151928	0.4996
13	1.716	5.12151	0.014898	0.028637
14	0.827501	4.40201	0.027843	0.03417
15	0.988001	8.84951	0.090042	0.162001
16	2.447	21.4215	0.428639	1.36069
17	2.9695	10.206	0.226221	0.70336
18	4.2795	8.708	0.074708	0.118687
19	1.594	7.97151	0.206409	1.29717
20	1.357	1.357	0.162172	0.23417
21	1.2015	4.75401	0.108556	0.394811
22	2.2985	6.04901	0.049904	0.176209
Others	1.551	1.774	/	/
CMRG_v1.00_HG002 is medically-relevant genes (CMRG) focusing on HG002.

## Sheet: Supplementary Table3
Supplementary Table 3. The summary of enrichment results in PaGenBase by using genes within Non-Complex_Region as a reference for Complex_Region genes in each chromosome of the human genome.
_MEMBER_Chr4(711)	_MEMBER_Chr5(755)	_MEMBER_Chr6(858)	_MEMBER_Chr7(834)	_MEMBER_Chr8(632)	_MEMBER_Chr9(693)	_MEMBER_Complex_Region	_LogP_Chr1(1767)	_LogP_Chr10(701)	_LogP_Chr11(1121)	_LogP_Chr12(965)	_LogP_Chr13(279)	_LogP_Chr14(577)	_LogP_Chr15(529)	_LogP_Chr16(618)	_LogP_Chr17(1061)	_LogP_Chr18(229)	_LogP_Chr19(1290)	_LogP_Chr2(1070)	_LogP_Chr20(516)	_LogP_Chr21(197)	_LogP_Chr22(366)	_LogP_Chr3(982)	_LogP_Chr4(711)	_LogP_Chr5(755)	_LogP_Chr6(858)	_LogP_Chr7(834)	_LogP_Chr8(632)	_LogP_Chr9(693)	_LogP_Complex_Region	GO	_PATTERN_	_RANK_	GiniIndex	Category	CategoryID	Description	PARENT_GO	LogP	Enrichment	Z-score	#TotalGeneInLibrary	#GeneInGO	#GeneInHitList	#GeneInGOAndHitList	%InGO	STDV %InGO	GeneID	Hits	Log(q-value)
0	0	0	0	0	0	1	-6.3	0	-2.3	-3.1	0	0	0	0	-3	0	-3.6	0	0	0	0	0	0	0	0	0	0	0	-8.6	PGB:00011	M10110000101000000000001	6	0	PaGenBase	36	Tissue-specific: spleen		-8.6	2	6.6	30293	500	2267	76	3.4	0.38	930|1235|1474|1521|2015|2214|2215|2249|2529|3055|3112|3117|3119|3120|3394|3560|3683|3805|3811|3812|4049|4050|4200|4242|4296|4671|5371|5790|5880|6494|7062|7186|7409|7940|8635|9437|9938|10261|10288|10750|10859|10981|10990|11024|11025|11027|11126|11151|11184|23166|23214|23547|27128|54106|56125|56142|56244|57010|64098|64174|79168|79345|79626|79930|81704|84824|127943|140706|146183|146206|146433|168975…	CD19|CCR6|CST6|CTSW|ADGRE1|FCGR3A|FCGR3B|FGF4|FUT7|HCK|HLA-DOB|HLA-DQA1|HLA-DQB1|HLA-DQB2|IRF8|IL2RB|ITGAL|KIR2DL4|KIR3DL1|KIR3DL2|LTA|LTB|ME2|MFNG|MAP3K11|NAIP|PML|PTPRCAP|RAC2|SIPA1|TCHH|TRAF2|VAV1|LST1|RNASET2|NCR1|ARHGAP25|IGSF6|LILRB2|GRAP|LILRB1|RAB32|LILRB5|LILRA1|LILRB3|LILRA2|CD160|CORO1A|MAP4K1|STAB1|XPO6|LILRA4|CYTH4|TLR9|PCDHB11|PCDHA6|BTNL2|CABP4|PARVG|DPEP2|LILRA6|OR51B2|TNFAIP8L2|D…	-6.4
0	0	0	0	0	0	1	0	0	0	-3.2	0	0	0	0	0	0	0	0	0	0	0	0	0	0	0	0	0	0	-6.9	PGB:00048	M00010000000000000000001	2	0	PaGenBase	36	Tissue-specific: bone marrow		-6.9	2.4	6.1	30293	227	2267	41	1.8	0.28	119|221|566|598|1265|1521|1669|1991|2015|2204|2352|2529|2993|2994|2996|3978|4084|4689|5341|5606|5657|6494|6556|6904|7124|7462|8676|8869|9437|9869|11024|11025|11027|23529|23765|51327|79168|80325|91300|117157|286530	ADD2|ALDH3B1|AZU1|BCL2L1|CNN2|CTSW|DEFA4|ELANE|ADGRE1|FCAR|FOLR3|FUT7|GYPA|GYPB|GYPE|LIG1|MXD1|NCF4|PLEK|MAP2K3|PRTN3|SIPA1|SLC11A1|TBCD|TNF|LAT2|STX11|ST3GAL5|NCR1|SETDB1|LILRA1|LILRB3|LILRA2|CLCF1|IL17RA|AHSP|LILRA6|ABTB1|R3HDM4|SH2D1B|P2RY8	-5
0	0	0	0	0	0	1	-4	0	0	-2.5	0	-2.3	0	0	0	0	0	0	0	0	0	0	0	0	0	0	0	0	-5.1	PGB:00041	M10010100000000000000001	4	0	PaGenBase	36	Tissue-specific: Blood		-5.1	2.1	5	30293	239	2267	38	1.7	0.27	199|1432|1439|1520|1521|2212|2215|2352|3055|3310|4641|4668|4689|5341|5698|7462|7940|9683|9938|10261|10288|10308|11024|11025|11027|11151|11329|23214|27128|55793|55911|56882|64174|79168|80325|91300|254102|353514	AIF1|MAPK14|CSF2RB|CTSS|CTSW|FCGR2A|FCGR3B|FOLR3|HCK|HSPA6|MYO1C|NAGA|NCF4|PLEK|PSMB9|LAT2|LST1|N4BP1|ARHGAP25|IGSF6|LILRB2|ZNF267|LILRA1|LILRB3|LILRA2|CORO1A|STK38|XPO6|CYTH4|MINDY1|APOBR|CDC42SE1|DPEP2|LILRA6|ABTB1|R3HDM4|EHBP1L1|LILRA5	-3.6
1	0	1	0	0	0	1	0	0	0	-3.1	0	0	0	0	0	0	-2.2	0	-2.4	0	0	-2.4	-3.2	0	-2.3	0	0	0	-4.2	PGB:00018	M00010000001010011010001	7	0	PaGenBase	36	Tissue-specific: lung		-4.2	1.7	4.2	30293	498	2267	62	2.7	0.34	151|218|566|1435|1474|1543|1668|1669|1767|1991|2006|2212|2215|2294|2885|2944|2993|2994|2996|3117|3119|3120|3563|3684|3694|3811|4041|4239|6348|6349|6362|6473|6556|8061|8482|8676|9777|10288|10568|11126|11216|11266|23263|23529|23659|28984|51162|51327|55654|64411|79948|80739|89780|124565|130813|144809|200504|245937|259215|400966|100130933|105375355	ADRA2B|ALDH3A1|AZU1|CSF1|CST6|CYP1A1|DEFA3|DEFA4|DNAH5|ELANE|ELN|FCGR2A|FCGR3B|FOXF1|GRB2|GSTM1|GYPA|GYPB|GYPE|HLA-DQA1|HLA-DQB1|HLA-DQB2|IL3RA|ITGAM|ITGB6|KIR3DL1|LRP5|MFAP4|CCL3|CCL3L1|CCL18|SHOX|SLC11A1|FOSL1|SEMA7A|STX11|TM9SF4|LILRB2|SLC34A2|CD160|AKAP10|DUSP12|MCF2L|CLCF1|PLA2G15|RGCC|EGFL7|AHSP|TMEM127|ARAP3|PLPPR3|MPIG6B|WNT3A|SLC38A10|C2orf50|FAM216B|GKN2|DEFB124|LY6G6F|RGPD1|SMIM6|UPK3B	-3.1
1	0	0	1	0	0	1	0	0	0	0	0	0	0	-2.4	-3.9	0	0	-3.4	0	0	0	0	-5.6	0	0	-3	0	0	-3.7	PGB:00002	M00000001100100001001001	6	0	PaGenBase	36	Cell-specific: HEPG2		-5.6	2.8	5.6	30293	425	696	27	3.9	0.73	127|130|131|174|213|1834|2160|2243|2244|2261|2266|4547|5981|6286|7358|7363|7364|7365|8999|10720|10941|22824|27163|54490|79799|81793|114932	ADH4|ADH6|ADH7|AFP|ALB|DSPP|F11|FGA|FGB|FGFR3|FGG|MTTP|RFC1|S100P|UGDH|UGT2B4|UGT2B7|UGT2B10|CDKL2|UGT2B11|UGT2A1|HSPA4L|NAAA|UGT2B28|UGT2A3|TLR10|MRFAP1L1	-4
0	0	0	0	0	0	1	0	0	0	0	0	0	0	0	0	0	0	0	0	0	0	0	0	0	0	0	0	0	-3.4	PGB:00204	M00000000000000000000001	1	0	PaGenBase	36	Cell-specific: Saphenous Vein Endothelial Cells		-3.4	13	6.1	30293	3	2267	3	0.13	0.076	5730|10669|92283	PTGDS|CGREF1|ZNF461	-2.5
0	0	0	0	0	0	1	0	0	0	0	0	0	0	0	0	0	0	0	0	0	-2.1	0	0	0	0	0	0	0	-3	PGB:00121	M00000000000000100000001	2	0	PaGenBase	36	Cell-specific: CD34+		-3	3.3	4	30293	36	2267	9	0.4	0.13	566|1991|2624|5325|5657|10198|23529|54360|79948	AZU1|ELANE|GATA2|PLAGL1|PRTN3|MPHOSPH9|CLCF1|CYTL1|PLPPR3	-2.2
0	0	0	0	0	0	1	0	0	0	0	0	0	0	0	0	0	0	0	0	0	0	0	0	0	0	0	0	0	-2.6	PGB:00165	M00000000000000000000001	1	0	PaGenBase	36	Cell-specific: BDCA4+ Dentritic Cells		-2.6	2.6	3.5	30293	56	2267	11	0.49	0.15	1438|2529|3394|3563|11006|23316|23547|27128|29993|57409|192683	CSF2RA|FUT7|IRF8|IL3RA|LILRB4|CUX2|LILRA4|CYTH4|PACSIN1|MIF4GD|SCAMP5	-2
0	0	0	0	0	0	1	0	0	0	0	0	0	0	-4.7	0	0	0	0	0	0	-2.2	0	0	0	0	0	0	0	-2	PGB:00051	M00000001000000100000001	3	0	PaGenBase	36	Tissue-specific: Cerebellum		-4.7	4.4	5.7	30293	141	590	12	2	0.58	869|1013|6650|7783|8131|9088|10573|23361|79447|89941|90864|253982	CBLN1|CDH15|CAPN15|ZP2|NPRL3|PKMYT1|MRPL28|ZNF629|PAGR1|RHOT2|SPSB3|ASPHD1	-3.3
0	0	1	0	0	0	1	0	0	0	0	0	0	0	0	0	0	-2.4	0	0	0	0	-2.3	0	0	-2.8	0	0	0	-2	PGB:00087	M00000000001000010010001	4	0	PaGenBase	36	Cell-specific: Lymphoma burkitts Raji		-2.8	2.9	3.7	30293	141	827	11	1.3	0.4	578|3662|9436|10591|11118|26054|51020|55023|60481|79683|154043	BAK1|IRF4|NCR2|DNPH1|BTN3A2|SENP6|HDDC2|PHIP|ELOVL5|ZDHHC14|CNKSR3	-2.1
0	0	0	1	0	0	0	-2.5	0	0	0	0	0	0	0	0	0	-2.3	0	0	0	0	0	0	0	0	-19	0	0	0	PGB:00053	M10000000001000000001000	3	0	PaGenBase	36	Cell-specific: NHEK		-19	4.9	13	30293	377	800	49	6.1	0.85	611|799|1080|1180|1551|2115|3792|5420|6522|6671|6878|7036|7982|8621|8701|9844|10371|10922|22853|23089|23658|24146|25851|26053|29803|53616|54443|55281|55503|63979|79690|79846|79974|80228|83605|84132|84255|95681|136332|168455|221785|222865|245812|285973|340351|349075|375567|387129|100861540	OPN1SW|CALCR|CFTR|CLCN1|CYP3A7|ETV1|KEL|PODXL|SLC4A2|SP4|TAF6|TFR2|ST7|CDK13|DNAH11|ELMO1|SEMA3A|FASTK|LMTK2|PEG10|LSM5|CLDN15|TECPR1|AUTS2|REPIN1|ADAM22|ANLN|TMEM140|TRPV6|FIGNL1|GAL3ST4|CFAP69|CPED1|ORAI2|CCM2|USP42|SLC37A3|CEP41|LRGUK|CCDC71L|ZSCAN25|TMEM130|CNPY4|ATG9B|AGBL3|ZNF713|VWC2|NPSR1|CYP3A7-CYP3A51P	-17
0	0	0	0	0	0	0	-2.7	0	0	-5.1	0	0	0	0	-13	-6.3	0	0	0	-2.7	0	0	0	0	0	0	0	0	0	PGB:00017	M10010000110001000000000	5	0	PaGenBase	36	Tissue-specific: skin		-13	4.6	9.9	30293	210	1024	33	3.2	0.55	239|242|642|3858|3861|3868|3872|3881|3882|3883|3884|3885|3886|8687|22861|59344|79651|81850|81851|83895|83897|83899|83900|83902|84616|85285|85291|85293|162605|201255|342574|653240|100132476	ALOX12|ALOX12B|BLMH|KRT10|KRT14|KRT16|KRT17|KRT31|KRT32|KRT33A|KRT33B|KRT34|KRT35|KRT38|NLRP1|ALOXE3|RHBDF2|KRTAP1-3|KRTAP1-1|KRTAP1-5|KRTAP3-2|KRTAP9-2|KRTAP9-3|KRTAP17-1|KRTAP4-4|KRTAP4-1|KRTAP4-2|KRTAP3-3|KRT28|LRRC45|KRT27|KRTAP4-11|KRTAP4-7	-10
0	0	0	1	0	0	0	0	0	0	0	0	0	0	0	0	0	0	0	0	0	0	0	0	0	0	-8.5	0	0	0	PGB:00024	M00000000000000000001000	1	0	PaGenBase	36	Cell-specific: GM12878		-8.5	3.2	7.3	30293	401	800	34	4.2	0.71	1124|1358|1644|1749|2020|2050|4289|5054|5166|5189|5243|7425|7980|8321|8976|10234|10248|10652|23072|23366|27445|55146|55973|56302|64753|79989|168544|221786|221981|222255|222256|256979|285971|346689	CHN2|CPA2|DDC|DLX5|EN2|EPHB4|MKLN1|SERPINE1|PDK4|PEX1|ABCB1|VGF|TFPI2|FZD1|WASL|LRRC17|POP7|YKT6|HECW1|MATCAP2|PCLO|ZDHHC4|BCAP29|TRPV5|CCDC136|IFT56|ZNF467|FAM200A|THSD7A|ATXN7L1|CDHR3|SUN3|ZNF775|KLRG2	-6.4
0	0	0	0	0	0	0	-7	0	0	0	0	0	0	0	0	0	0	0	0	0	0	0	0	0	0	0	0	0	0	PGB:00130	M10000000000000000000000	1	0	PaGenBase	36	Cell-specific: CD105+ Endothelial		-7	11	8.7	30293	13	1716	8	0.47	0.16	712|713|3953|5313|7412|51603|54741|100131187	C1QA|C1QB|LEPR|PKLR|VCAM1|METTL13|LEPROT|TSTD1	-5.1
0	0	0	1	0	0	0	0	0	0	0	0	0	0	0	0	0	0	0	0	0	0	0	0	0	0	-6.9	0	0	0	PGB:00019	M00000000000000000001000	1	0	PaGenBase	36	Cell-specific: H1-hesc		-6.9	2.8	6.3	30293	447	800	33	4.1	0.7	196|313|858|1576|1577|1811|2128|2792|2861|3203|3569|3696|4034|5446|6677|11281|26157|27010|27153|27434|29960|54809|55975|81844|89122|93986|154664|168850|219557|221895|253012|340252|402573	AHR|AOAH|CAV2|CYP3A4|CYP3A5|SLC26A3|EVX1|GNGT1|GPR37|HOXA6|IL6|ITGB8|LRCH4|PON3|SPAM1|POU6F2|GIMAP2|TPK1|ZNF777|POLM|MRM2|SAMD9|KLHL7|TRIM56|TRIM4|FOXP2|ABCA13|ZNF800|TEX47|JAZF1|HEPACAM2|ZNF680|SPACDR	-5
0	0	0	0	0	0	0	0	0	0	0	0	0	0	0	-6.1	0	0	0	0	0	0	0	0	0	0	0	0	0	0	PGB:00105	M00000000100000000000000	1	0	PaGenBase	36	Cell-specific: MCF7		-6.1	9.9	8.1	30293	24	1024	8	0.78	0.28	1534|6198|8493|10513|51174|54828|63897|83990	CYB561|RPS6KB1|PPM1D|APPBP2|TUBD1|BCAS3|HEATR6|BRIP1	-4.4
0	0	1	1	0	0	0	0	0	0	0	0	0	0	0	0	0	0	0	0	0	0	0	0	0	-2.2	-5.5	0	0	0	PGB:00052	M00000000000000000011000	2	0	PaGenBase	36	Cell-specific: HELA		-5.5	3.6	5.9	30293	188	800	18	2.2	0.52	43|948|1278|4521|4951|22798|23382|26958|54556|55698|56975|64598|64761|90639|136319|155066|346389|654231	ACHE|CD36|COL1A2|NUDT1|OCM2|LAMB4|AHCYL2|COPG2|ING3|RADIL|FAM20C|MOSPD3|PARP12|COX19|MTPN|ATP6V0E2|MACC1|OCM	-3.9
0	0	0	0	0	0	0	-5.3	0	0	-2.6	0	0	0	0	0	-2	0	0	0	0	0	0	0	0	0	0	0	0	0	PGB:00005	M10010000010000000000000	3	0	PaGenBase	36	Tissue-specific: tonsil		-5.3	4.1	5.9	30293	60	1716	14	0.82	0.22	6003|6278|6698|6699|6703|6707|7579|10964|29943|49860|54544|64407|83417|163351	RGS13|S100A7|SPRR1A|SPRR1B|SPRR2D|SPRR3|ZSCAN20|IFI44L|PADI1|CRNN|CRCT1|RGS18|FCRL4|GBP6	-3.8
0	0	0	0	0	0	0	0	0	0	0	0	0	0	0	0	0	-5.3	0	0	0	0	0	0	0	0	0	0	0	0	PGB:00192	M00000000001000000000000	1	0	PaGenBase	36	Cell-specific: GM133		-5.3	12	7.8	30293	13	1209	6	0.5	0.2	5669|5670|5671|5675|5676|440533	PSG1|PSG2|PSG3|PSG6|PSG7|PSG8	-3.7
1	0	0	0	0	0	0	0	0	0	0	0	0	0	0	0	0	0	-2.4	0	0	0	0	-5.1	0	0	0	0	0	0	PGB:00078	M00000000000100001000000	2	0	PaGenBase	36	Cell-specific: liver cell		-5.1	5.3	6.2	30293	91	696	11	1.6	0.47	130|174|213|2243|2244|4547|7363|7364|54502|79799|152831	ADH6|AFP|ALB|FGA|FGB|MTTP|UGT2B4|UGT2B7|RBM47|UGT2A3|KLB	-3.6
0	0	0	0	0	0	0	-4.5	0	0	-3.5	0	0	0	-2.3	0	-5.1	0	0	0	0	0	0	0	0	0	0	0	0	0	PGB:00081	M10010001010000000000000	4	0	PaGenBase	36	Cell-specific: Bronchial Epithelial Cells		-5.1	7.9	7	30293	137	223	8	3.6	1.2	1824|1825|1829|1830|3909|5055|5268|8731	DSC2|DSC3|DSG2|DSG3|LAMA3|SERPINB2|SERPINB5|RNMT	-3.6
1	1	1	0	0	0	0	0	-4.8	0	0	0	0	0	0	0	0	0	-4.8	0	0	0	0	-2.1	-2.1	-4.9	0	0	0	0	PGB:00004	M01000000000100001110000	5	0	PaGenBase	36	Tissue-specific: kidney		-4.9	2.4	5	30293	483	827	31	3.7	0.66	2444|2938|2939|3617|4295|5314|6492|6568|6582|7020|7021|8521|8645|8838|8870|9465|10786|10864|23787|27283|51473|51557|83551|134860|135644|168002|221357|222545|222643|266977|319100	FRK|GSTA1|GSTA2|IMPG1|MLN|PKHD1|SIM1|SLC17A1|SLC22A2|TFAP2A|TFAP2B|GCM1|KCNK5|CCN6|IER3|AKAP7|SLC17A3|SLC22A7|MTCH1|TINAG|DCDC2|LGSN|TAAR8|TAAR9|TRIM40|DACT2|GSTA5|GPRC6A|UNC5CL|ADGRF1|TAAR6	-3.5
1	1	0	1	0	0	0	0	0	0	0	0	0	0	0	0	0	0	0	0	0	0	0	-2.6	-4.9	0	-3	0	0	0	PGB:00120	M00000000000000001101000	3	0	PaGenBase	36	Cell-specific: Cardiac Myocytes		-4.9	6.2	6.3	30293	60	737	9	1.2	0.4	1404|1809|2149|3572|7025|8614|10769|22836|81555	HAPLN1|DPYSL3|F2R|IL6ST|NR2F1|STC2|PLK2|RHOBTB3|YIPF5	-3.5
0	0	0	0	0	0	0	0	0	0	0	0	0	0	0	0	0	0	-4.8	0	0	0	0	0	0	0	0	0	0	0	PGB:00147	M00000000000100000000000	1	0	PaGenBase	36	Cell-specific: SKMEL28		-4.8	10	7.2	30293	17	1046	6	0.57	0.23	3357|4862|5334|7145|64284|80210	HTR2B|NPAS2|PLCL1|TNS1|RAB17|ARMC9	-3.4
0	0	0	0	0	0	0	-4.8	0	0	0	0	0	0	0	0	0	0	0	0	0	0	0	0	0	0	0	0	0	0	PGB:00156	M10000000000000000000000	1	0	PaGenBase	36	Tissue-specific: Tongue		-4.8	5	5.9	30293	35	1716	10	0.58	0.18	5317|6273|6278|6279|6698|6699|6701|6707|49860|54544	PKP1|S100A2|S100A7|S100A8|SPRR1A|SPRR1B|SPRR2B|SPRR3|CRNN|CRCT1	-3.4
0	0	0	0	0	0	0	0	0	0	0	0	0	0	0	0	0	-4.7	0	0	0	0	0	0	0	0	0	0	0	0	PGB:00090	M00000000001000000000000	1	0	PaGenBase	36	Cell-specific: PANC1		-4.7	13	7.4	30293	10	1209	5	0.41	0.18	208|7538|9149|92609|115290	AKT2|ZFP36|DYRK1B|TIMM50|FBXO17	-3.3
1	1	0	0	1	1	0	-3.1	0	-2.6	0	-3.1	0	0	-2.4	0	0	0	0	-2.4	0	0	-4.7	-2.7	-2.4	0	0	-3.1	-2.2	0	PGB:00014	M10101001000010011100110	10	0	PaGenBase	36	Cell-specific: DRG		-4.7	2.2	4.8	30293	456	948	32	3.4	0.59	185|347|885|956|1795|2199|2596|2771|4057|4241|5468|6474|6750|6769|7079|7545|7869|7881|8618|8927|8997|9370|9934|22989|23066|25827|29114|51560|57060|64689|131450|131544	AGTR1|APOD|CCK|ENTPD3|DOCK3|FBLN2|GAP43|GNAI2|LTF|MELTF|PPARG|SHOX2|SST|STAC|TIMP4|ZIC1|SEMA3B|KCNAB1|CADPS|BSN|KALRN|ADIPOQ|P2RY14|MYH15|CAND2|FBXL2|TAGLN3|RAB6B|PCBP4|GORASP1|CD200R1|CRYBG3	-3.3
1	0	0	0	0	0	0	0	0	0	0	0	0	0	0	0	0	0	0	0	0	0	0	-4.7	0	0	0	0	0	0	PGB:00095	M00000000000000001000000	1	0	PaGenBase	36	Cell-specific: LNCAP		-4.7	8	6.6	30293	38	696	7	1	0.38	374|2982|7366|7367|10417|54490|79884	AREG|GUCY1A1|UGT2B15|UGT2B17|SPON2|UGT2B28|MAP9	-3.3
1	0	0	1	0	0	0	-3.1	-3.2	-2.9	-3.1	0	-2	0	0	0	0	-4.1	-4.4	0	0	0	-3.5	-4.5	0	0	-3.3	0	0	0	PGB:00001	M11110100001100011001000	10	0	PaGenBase	36	Tissue-specific: liver		-4.5	2.1	4.6	30293	692	696	34	4.9	0.82	124|125|126|127|130|131|173|213|2160|2243|2244|2250|2266|2638|2920|3083|3248|3426|3818|4547|6783|6999|7358|7363|7365|7366|7367|10720|11199|27284|51023|54490|152503|345275	ADH1A|ADH1B|ADH1C|ADH4|ADH6|ADH7|AFM|ALB|F11|FGA|FGB|FGF5|FGG|GC|CXCL2|HGFAC|HPGD|CFI|KLKB1|MTTP|SULT1E1|TDO2|UGDH|UGT2B4|UGT2B10|UGT2B15|UGT2B17|UGT2B11|ANXA10|SULT1B1|MRPS18C|UGT2B28|SH3D19|HSD17B13	-3.2
1	0	0	0	0	0	0	0	0	0	0	0	0	0	0	0	0	0	0	-4.5	0	0	0	-3.2	0	0	0	0	0	0	PGB:00073	M00000000000010001000000	2	0	PaGenBase	36	Tissue-specific: salivary gland		-4.5	4.5	5.6	30293	147	500	11	2.2	0.66	1469|1470|1472|1473|5332|5933|8200|57158|117532|140683|164284	CST1|CST2|CST4|CST5|PLCB4|RBL1|GDF5|JPH2|TMC2|BPIFA2|APCDD1L	-3.2
0	0	0	0	0	0	0	-4.3	-2.2	0	-2.5	0	0	0	0	0	0	0	0	0	0	0	0	0	0	0	0	0	0	0	PGB:00010	M11010000000000000000000	3	0	PaGenBase	36	Tissue-specific: adipose tissue		-4.3	2.4	4.7	30293	174	1716	24	1.4	0.28	1031|1805|3744|4014|5317|6275|6708|23436|26239|50486|63036|63923|116362|126767|128366|163782|353131|353132|353137|353140|388698|448834|100129271|100533111	CDKN2C|DPT|KCNA10|LORICRIN|PKP1|S100A4|SPTA1|CELA3B|LCE2B|G0S2|CELA2A|TNN|RBP7|AADACL3|OR6P1|KANK4|LCE1A|LCE1B|LCE1F|LCE2C|FLG2|KPRP|KPLCE|ZNF670-ZNF695	-3.1
0	0	1	0	0	0	0	0	0	0	0	-4.3	0	0	0	0	0	0	0	0	0	0	0	0	0	-2.4	0	0	0	0	PGB:00109	M00001000000000000010000	2	0	PaGenBase	36	Cell-specific: COLO205		-4.3	19	8.3	30293	24	267	4	1.5	0.74	8100|10284|51084|283537	IFT88|SAP18|CRYL1|SLC46A3	-3.1
0	1	0	1	0	0	0	0	0	0	-2.3	0	0	-2.8	0	0	0	0	0	0	0	0	0	0	-2.3	0	-4.2	0	0	0	PGB:00031	M00010010000000000101000	4	0	PaGenBase	36	Cell-specific: HUVEC		-4.2	2.4	4.6	30293	371	800	24	3	0.6	1174|1278|1780|2861|3204|3207|4846|4897|5054|5137|7328|7980|10875|11185|26872|27072|30816|55973|57154|80820|136263|155054|353345|401409	AP1S1|COL1A2|DYNC1I1|GPR37|HOXA7|HOXA11|NOS3|NRCAM|SERPINE1|PDE1C|UBE2H|TFPI2|FGL2|INMT|STEAP1|VPS41|ERVW-1|BCAP29|SMURF1|EEPD1|SSMEM1|ZNF425|GPR141|RAB19	-3
0	0	0	1	0	0	0	0	0	0	0	0	0	0	0	0	0	-4.2	0	0	0	0	0	0	0	0	-2.9	0	0	0	PGB:00104	M00000000001000000001000	2	0	PaGenBase	36	Cell-specific: HCC2998		-4.2	7.9	6.1	30293	19	1209	6	0.5	0.2	2524|2525|11012|79784|91646|342977	FUT2|FUT3|KLK11|MYH14|TDRD12|NANOS3	-3
0	0	0	0	1	0	0	0	0	0	0	0	0	-2.2	0	0	0	0	0	0	0	0	0	0	0	0	0	-4.2	0	0	PGB:00054	M00000010000000000000100	2	0	PaGenBase	36	Tissue-specific: thyroid		-4.2	3.3	4.9	30293	233	599	15	2.5	0.64	761|862|1936|4982|5828|6383|6482|6575|6641|7038|10404|57604|93035|115111|642658	CA3|RUNX1T1|EEF1D|TNFRSF11B|PEX2|SDC2|ST3GAL1|SLC20A2|SNTB1|TG|CPQ|TRMT9B|PKHD1L1|SLC26A7|SCX	-3
0	0	0	1	0	0	0	0	0	0	0	0	0	0	0	-2.1	0	-3.2	0	0	0	0	0	0	0	0	-4.2	0	0	0	PGB:00045	M00000000101000000001000	3	0	PaGenBase	36	Tissue-specific: placenta		-4.2	2.6	4.6	30293	305	800	21	2.6	0.57	26|669|1749|1956|2792|3082|3484|3569|3624|3952|4232|5054|7980|9715|10643|28969|28988|30816|55503|64764|221981	AOC1|BPGM|DLX5|EGFR|GNGT1|HGF|IGFBP1|IL6|INHBA|LEP|MEST|SERPINE1|TFPI2|FAM131B|IGF2BP3|BZW2|DBNL|ERVW-1|TRPV6|CREB3L2|THSD7A	-3
0	0	0	0	0	1	0	0	0	0	0	0	0	0	0	0	0	0	0	0	0	0	0	0	0	0	0	0	-4	0	PGB:00072	M00000000000000000000010	1	0	PaGenBase	36	Tissue-specific: uterus		-4	4.9	5.3	30293	83	671	9	1.3	0.44	1056|1289|2619|3442|4969|5047|5711|54796|54829	CEL|COL5A1|GAS1|IFNA5|OGN|PAEP|PSMD5|BNC2|ASPN	-2.9
0	0	0	0	0	0	0	0	0	0	0	0	0	0	0	0	0	0	-2.5	-4	0	0	0	0	0	0	0	0	0	0	PGB:00059	M00000000000110000000000	2	0	PaGenBase	36	Cell-specific: Testis Germ Cell		-4	5.6	5.5	30293	87	500	8	1.6	0.56	2778|10816|23627|57119|79025|128821|140870|391253	GNAS|SPINT3|PRND|EPPIN|FNDC11|CST9L|WFDC6|SPINT4	-2.9
0	0	0	0	0	0	0	0	0	0	0	0	-4	0	0	0	0	0	0	0	0	0	0	0	0	0	0	0	0	0	PGB:00094	M00000100000000000000000	1	0	PaGenBase	36	Cell-specific: UACC62		-4	16	7.4	30293	14	558	4	0.72	0.36	12|6035|9472|114088	SERPINA3|RNASE1|AKAP6|TRIM9	-2.9
0	0	0	0	1	0	0	0	0	0	0	0	0	0	0	0	0	0	0	0	0	0	0	0	0	0	0	-3.9	0	0	PGB:00069	M00000000000000000000100	1	0	PaGenBase	36	Cell-specific: A204		-3.9	6.2	5.6	30293	57	599	7	1.2	0.44	1392|2260|4325|5179|5368|6781|10863	CRH|FGFR1|MMP16|PENK|PNOC|STC1|ADAM28	-2.8
0	0	0	0	0	0	0	-2.2	-3.3	-2.2	0	0	0	0	0	-3.9	0	0	0	0	0	0	0	0	0	0	0	0	0	0	PGB:00044	M11100000100000000000000	4	0	PaGenBase	36	Tissue-specific: skeletal muscle		-3.9	2.2	4.3	30293	384	1024	28	2.7	0.51	782|786|1140|2027|4619|4620|4621|4622|4626|6329|6442|7326|8387|8388|8557|8735|9570|10749|55720|79066|84940|91647|116729|147183|201140|201294|255275|342527	CACNB1|CACNG1|CHRNB1|ENO3|MYH1|MYH2|MYH3|MYH4|MYH8|SCN4A|SGCA|UBE2G1|OR1E1|OR1E2|TCAP|MYH13|GOSR2|KIF1C|TSR1|METTL16|CORO6|ATPAF2|PPP1R27|KRT25|DHRS7C|UNC13D|MYADML2|SMTNL2	-2.8
0	0	0	1	0	0	0	0	0	0	0	0	0	0	0	0	0	-3.6	0	0	0	0	0	0	0	0	-3.9	0	0	0	PGB:00027	M00000000001000000001000	2	0	PaGenBase	36	Cell-specific: K562		-3.9	2.1	4.3	30293	516	800	29	3.6	0.66	800|1687|2852|3198|3757|3792|3955|5218|5645|9311|9734|10124|10157|10512|25913|29999|51666|57639|79974|83992|84182|115330|130075|136288|154661|223075|340273|375611|445347	CALD1|GSDME|GPER1|HOXA1|KCNH2|KEL|LFNG|CDK14|PRSS2|ASIC3|HDAC9|ARL4A|AASS|SEMA3C|POT1|FSCN3|ASB4|CCDC146|CPED1|CTTNBP2|MINDY4|GPR146|OR9A4|C7orf57|RUNDC3B|ITPRID1|ABCB5|SLC26A5|TARP	-2.8
0	0	0	0	0	0	0	0	0	0	0	0	0	0	0	0	0	0	0	-3.9	0	0	0	0	0	0	0	0	0	0	PGB:00050	M00000000000010000000000	1	0	PaGenBase	36	Tissue-specific: trachea		-3.9	5.3	5.4	30293	91	500	8	1.6	0.56	5753|6590|10079|10406|51297|80341|92747|128602	PTK6|SLPI|ATP9A|WFDC2|BPIFA1|BPIFB2|BPIFB1|CIMIP1	-2.8
1	0	0	0	0	0	0	-3.8	0	0	0	0	0	0	0	0	0	0	-2.5	0	0	0	0	-3.4	0	0	0	0	0	0	PGB:00016	M10000000000100001000000	3	0	PaGenBase	36	Tissue-specific: thymus		-3.8	2.2	4.2	30293	211	1716	26	1.5	0.29	909|910|911|912|913|914|919|1031|1117|1130|1870|2672|3586|3604|3932|4194|5788|6375|6504|10228|26191|27185|55143|56950|80342|115273	CD1A|CD1B|CD1C|CD1D|CD1E|CD2|CD247|CDKN2C|CHI3L2|LYST|E2F2|GFI1|IL10|TNFRSF9|LCK|MDM4|PTPRC|XCL1|SLAMF1|STX6|PTPN22|DISC1|CDCA8|SMYD2|TRAF3IP3|RAB42	-2.7
0	0	0	0	0	0	0	0	0	0	-3.8	0	0	0	0	0	0	0	0	0	0	0	0	0	0	0	0	0	0	0	PGB:00021	M00010000000000000000000	1	0	PaGenBase	36	Tissue-specific: ovary pool		-3.8	7	5.6	30293	28	928	6	0.65	0.26	32|3221|4193|8496|10060|11052	ACACB|HOXC4|MDM2|PPFIBP1|ABCC9|CPSF6	-2.7
0	0	0	0	0	0	0	0	0	0	0	0	-3.8	0	0	0	0	0	0	0	0	0	0	0	0	0	0	0	0	0	PGB:00043	M00000100000000000000000	1	0	PaGenBase	36	Cell-specific: CD56+ NKCells		-3.8	5.9	5.4	30293	64	558	7	1.3	0.47	2999|5729|5732|8477|26030|54331|440193	GZMH|PTGDR|PTGER2|GPR65|PLEKHG3|GNG2|CCDC88C	-2.7
0	0	0	0	0	1	0	0	0	-2.2	-2.3	0	0	0	0	0	0	0	0	0	0	0	-3.7	0	0	0	0	0	-2.3	0	PGB:00049	M00110000000000010000010	4	0	PaGenBase	36	Cell-specific: Adipocyte		-3.7	3.1	4.5	30293	145	948	14	1.5	0.39	185|347|2199|3693|4311|5468|5793|7018|7079|9370|10840|26577|55076|63924	AGTR1|APOD|FBLN2|ITGB5|MME|PPARG|PTPRG|TF|TIMP4|ADIPOQ|ALDH1L1|PCOLCE2|TMEM45A|CIDEC	-2.7
1	1	0	1	0	0	0	0	0	0	0	0	0	0	0	0	0	0	-3.6	0	0	0	0	-2	-3	0	-2.2	0	0	0	PGB:00015	M00000000000100001101000	4	0	PaGenBase	36	Tissue-specific: Smooth Muscle		-3.6	3.4	4.6	30293	103	1046	12	1.1	0.33	390|1290|1803|2191|3552|3553|4430|6654|7130|7837|54431|55022	RND3|COL5A2|DPP4|FAP|IL1A|IL1B|MYO1B|SOS1|TNFAIP6|PXDN|DNAJC10|PID1	-2.7
0	0	0	0	0	0	0	0	0	0	0	0	0	0	0	0	0	0	0	0	-3.6	0	0	0	0	0	0	0	0	0	PGB:00068	M00000000000001000000000	1	0	PaGenBase	36	Tissue-specific: Stomach		-3.6	13	6.7	30293	48	191	4	2.1	1	1826|7031|7032|9992	DSCAM|TFF1|TFF2|KCNE2	-2.6
0	0	0	0	0	0	0	0	0	-3.2	0	0	0	0	-2.5	-3.2	0	-3.6	0	0	0	0	0	0	0	0	0	0	0	0	PGB:00007	M00100001101000000000000	4	0	PaGenBase	36	Tissue-specific: colon		-3.6	2.1	4.1	30293	338	1209	28	2.3	0.43	354|634|1048|1087|1264|1943|2525|5143|5349|6370|8174|8190|8857|9518|10331|23624|26539|27134|27151|53827|54795|54831|54854|56971|114026|126353|148156|338321	KLK3|CEACAM1|CEACAM5|CEACAM7|CNN1|EFNA2|FUT3|PDE4C|FXYD3|CCL25|MADCAM1|MIA|FCGBP|GDF15|B3GNT3|CBLC|OR10H1|TJP3|CPAMD8|FXYD5|TRPM4|BEST2|FAM83E|CEACAM19|ZIM3|MISP|ZNF558|NLRP9	-2.6
0	0	0	0	0	0	0	0	0	0	-3.4	0	0	0	0	0	0	0	0	0	0	0	0	0	0	0	0	0	0	0	PGB:00033	M00010000000000000000000	1	0	PaGenBase	36	Cell-specific: ACHN		-3.4	11	6.1	30293	12	928	4	0.43	0.22	5939|10060|10411|55652	RBMS2|ABCC9|RAPGEF3|SLC48A1	-2.5
0	0	0	0	0	1	0	-2.1	0	0	0	0	0	0	0	0	0	0	0	0	0	0	0	0	0	0	0	0	-3.4	0	PGB:00026	M10000000000000000000010	2	0	PaGenBase	36	Cell-specific: CD71+ EarlyErythroid		-3.4	3.4	4.4	30293	146	671	11	1.6	0.49	210|7111|8328|8395|8818|10444|25853|26130|55363|80256|81689	ALAD|TMOD1|GFI1B|PIP5K1B|DPM2|ZER1|DCAF12|GAPVD1|HEMGN|ATOSB|ISCA1	-2.5
0	0	0	0	0	0	0	-3.4	0	0	0	0	0	0	0	0	0	0	0	0	0	0	0	0	0	0	0	0	0	0	PGB:00034	M10000000000000000000000	1	0	PaGenBase	36	Cell-specific: OVR278E		-3.4	2.4	4	30293	131	1716	18	1	0.25	607|2329|2786|4919|5396|7059|7100|7482|9826|10207|10637|11146|23207|23266|51592|57172|81563|375035	BCL9|FMO4|GNG4|ROR1|PRRX1|THBS3|TLR5|WNT2B|ARHGEF11|PATJ|LEFTY1|GLMN|PLEKHM2|ADGRL2|TRIM33|CAMK1G|C1orf21|SFT2D2	-2.5
0	0	0	0	0	0	0	0	0	-3.4	0	0	0	0	0	0	0	0	0	0	0	0	0	0	0	0	0	0	0	0	PGB:00083	M00100000000000000000000	1	0	PaGenBase	36	Cell-specific: SF268		-3.4	17	6.8	30293	5	1091	3	0.27	0.16	867|4297|25988	CBL|KMT2A|HINFP	-2.5
0	0	0	0	0	0	0	0	0	-3.4	0	0	0	0	0	0	0	0	0	0	0	0	0	0	0	0	0	0	0	0	PGB:00171	M00100000000000000000000	1	0	PaGenBase	36	Cell-specific: SF295		-3.4	17	6.8	30293	5	1091	3	0.27	0.16	4314|4321|4900	MMP3|MMP12|NRGN	-2.5
0	0	1	0	0	0	0	0	0	0	-3.2	0	0	0	0	0	0	0	0	0	0	0	0	0	0	-2.5	0	0	0	0	PGB:00047	M00010000000000000010000	2	0	PaGenBase	36	Cell-specific: THY+		-3.2	3.2	4.2	30293	111	928	11	1.2	0.36	2784|3889|3902|4604|4618|5542|5916|6910|7556|9182|10599	GNB3|KRT83|LAG3|MYBPC1|MYF6|PRB1|RARG|TBX5|ZNF10|RASSF9|SLCO1B1	-2.4
0	0	0	0	0	0	0	0	0	0	0	0	0	0	-2.4	0	0	0	-3.1	0	0	0	0	0	0	0	0	0	0	0	PGB:00064	M00000001000100000000000	2	0	PaGenBase	36	Cell-specific: RPMI 8226		-3.1	5.3	4.6	30293	33	1046	6	0.57	0.23	926|940|3938|8745|10203|400961	CD8B|CD28|LCT|ADAM23|CALCRL|PAIP2B	-2.3
1	0	0	1	0	0	0	0	0	0	0	0	0	0	0	0	0	0	0	0	0	0	0	-2.2	0	0	-3.1	0	0	0	PGB:00075	M00000000000000001001000	2	0	PaGenBase	36	Cell-specific: SKMEL5		-3.1	8.9	5.4	30293	17	800	4	0.5	0.25	27445|50617|51666|54504	PCLO|ATP6V0A4|ASB4|CPVL	-2.3
0	0	0	0	0	0	0	0	0	0	0	0	0	0	0	0	0	-3.1	0	0	0	0	0	0	0	0	0	0	0	0	PGB:00057	M00000000001000000000000	1	0	PaGenBase	36	Tissue-specific: ovary		-3.1	2.1	3.7	30293	245	1209	21	1.7	0.38	2354|2864|3036|5178|8425|10054|55702|57616|60680|80032|90075|91442|114132|116412|147744|148206|256051|284427|400709|100529855|100533990	FOSB|FFAR1|HAS1|PEG3|LTBP4|UBA2|YJU2|TSHZ3|CELF5|ZNF556|ZNF30|FAAP24|SIGLEC11|ZNF837|TMEM190|ZNF714|ZNF549|SLC25A41|SIGLEC16|ZNF625-ZNF20|APOC4-APOC2	-2.3
0	0	0	0	0	0	0	0	0	0	0	0	0	0	0	0	0	0	0	0	0	-3	0	0	0	0	0	0	0	0	PGB:00084	M00000000000000100000000	1	0	PaGenBase	36	Tissue-specific: Lymph node		-3	5.4	4.6	30293	97	350	6	1.7	0.69	5594|5988|7441|11200|440829|100423062	MAPK1|RFPL1|VPREB1|CHEK2|SHISA8|IGLL5	-2.3
0	0	0	1	0	0	0	0	0	0	0	0	0	-3	0	0	-2.6	0	-2.7	0	0	0	0	0	0	0	-2.3	0	0	0	PGB:00037	M00000010010100000001000	4	0	PaGenBase	36	Tissue-specific: heart		-3	2.6	3.8	30293	321	504	14	2.8	0.73	70|1138|3418|7168|10021|27023|55466|56905|81488|84529|123722|145781|348093|100820829	ACTC1|CHRNA5|IDH2|TPM1|HCN4|FOXB1|DNAJA4|C15orf39|POLR2M|CDIN1|FSD2|GCOM1|RBPMS2|MYZAP	-2.2
0	0	0	1	0	0	0	0	0	0	0	0	0	0	0	0	0	0	0	0	0	0	-2.9	0	0	0	-2.5	0	0	0	PGB:00036	M00000000000000010001000	2	0	PaGenBase	36	Cell-specific: MOLT4		-2.9	2.8	3.8	30293	137	948	12	1.3	0.36	1232|1238|4820|6657|9223|10225|10803|23007|50852|54585|80852|131566	CCR3|ACKR2|NKTR|SOX2|MAGI1|CD96|CCR9|PLCH1|TRAT1|LZTFL1|GRIP2|DCBLD2	-2.2
0	0	0	0	0	0	0	0	0	0	-2.9	0	0	0	0	0	0	0	0	0	0	0	0	0	0	0	0	0	0	0	PGB:00082	M00010000000000000000000	1	0	PaGenBase	36	Cell-specific: Breast cell		-2.9	4.2	4.2	30293	55	928	7	0.75	0.28	3852|3856|3875|4256|85004|144501|347902	KRT5|KRT8|KRT18|MGP|RERG|KRT80|AMIGO2	-2.2
0	0	0	0	0	0	0	0	0	0	0	0	0	0	0	-2.8	0	0	0	0	0	0	0	0	0	0	0	0	0	0	PGB:00062	M00000000100000000000000	1	0	PaGenBase	36	Cell-specific: Skeletal Muscle Stromal Cells		-2.8	5.7	4.5	30293	26	1024	5	0.49	0.22	2027|4619|4620|4621|4635	ENO3|MYH1|MYH2|MYH3|MYL4	-2.1
0	0	0	0	0	0	0	0	0	0	0	0	0	0	0	-2.8	0	0	0	-2.7	0	0	0	0	0	0	0	0	0	0	PGB:00089	M00000000100010000000000	2	0	PaGenBase	36	Cell-specific: LOX IMVI		-2.8	7.4	4.8	30293	16	1024	4	0.39	0.19	1440|3883|3884|3885	CSF3|KRT33A|KRT33B|KRT34	-2.1
0	0	0	0	0	0	0	0	0	0	0	0	0	0	0	0	0	0	0	0	0	-2.7	0	0	0	0	0	0	0	0	PGB:00131	M00000000000000100000000	1	0	PaGenBase	36	Cell-specific: B-lymphocyte		-2.7	7.7	4.9	30293	45	350	4	1.1	0.57	3543|4151|4320|51233	IGLL1|MB|MMP11|DRICH1	-2.1
0	0	0	1	0	0	0	0	0	0	0	0	0	0	0	0	0	0	0	0	0	0	0	0	0	0	-2.7	0	0	0	PGB:00067	M00000000000000000001000	1	0	PaGenBase	36	Cell-specific: Brain cell		-2.7	4	4	30293	67	800	7	0.88	0.33	857|1278|2791|3486|5054|7980|10371	CAV1|COL1A2|GNG11|IGFBP3|SERPINE1|TFPI2|SEMA3A	-2.1
0	0	0	0	0	0	0	-2.1	0	0	0	0	0	0	0	0	0	0	-2.7	0	0	0	0	0	0	0	0	0	0	0	PGB:00102	M10000000000100000000000	2	0	PaGenBase	36	Cell-specific: NCI H226		-2.7	11	5.3	30293	8	1046	3	0.29	0.17	2066|2637|4133	ERBB4|GBX2|MAP2	-2.1
0	0	0	0	0	0	0	0	0	-2.7	0	0	0	0	0	0	0	0	0	0	0	0	0	0	0	0	0	0	0	0	PGB:00056	M00100000000000000000000	1	0	PaGenBase	36	Tissue-specific: spinal cord		-2.7	3.5	3.8	30293	64	1091	8	0.73	0.26	187|797|1128|1270|2977|58473|81490|338645	APLNR|CALCB|CHRM1|CNTF|GUCY1A2|PLEKHB1|PTDSS2|LUZP2	-2.1
0	0	0	0	1	0	0	0	0	0	0	0	0	0	0	0	0	0	0	0	0	0	0	0	0	0	0	-2.7	0	0	PGB:00063	M00000000000000000000100	1	0	PaGenBase	36	Cell-specific: OVR278S		-2.7	4.5	4.1	30293	67	599	6	1	0.41	114|2260|2515|7553|8658|116039	ADCY8|FGFR1|ADAM2|ZNF7|TNKS|OSR2	-2.1
0	0	0	0	0	0	0	0	0	0	0	0	0	0	0	-2.7	0	0	0	0	0	0	0	0	0	0	0	0	0	0	PGB:00099	M00000000100000000000000	1	0	PaGenBase	36	Cell-specific: IGROV1		-2.7	7	4.6	30293	17	1024	4	0.39	0.19	3759|3773|55890|192666	KCNJ2|KCNJ16|GPRC5C|KRT24	-2.1
0	0	0	0	0	0	0	0	-2.7	0	0	0	0	0	0	0	0	0	0	-2.1	0	0	0	0	0	0	0	0	0	0	PGB:00103	M01000000000010000000000	2	0	PaGenBase	36	Tissue-specific: Bladder		-2.7	7.1	4.6	30293	25	683	4	0.59	0.29	6319|6585|7414|55118	SCD|SLIT1|VCL|CRTAC1	-2.1
0	0	0	0	0	0	0	0	0	0	0	0	0	0	-2	0	0	-2.3	-2.6	0	0	0	0	0	0	0	0	0	0	0	PGB:00025	M00000001001100000000000	3	0	PaGenBase	36	Tissue-specific: pancreas		-2.6	2.1	3.4	30293	245	1046	18	1.7	0.4	905|1144|2641|4613|4709|5068|5967|5968|7349|7840|54221|55997|117583|130120|130367|339768|348654|375318	CCNT2|CHRND|GCG|MYCN|NDUFB3|REG3A|REG1A|REG1B|UCN|ALMS1|SNTG2|CFC1|PARD3B|REG3G|SGPP2|ESPNL|GEN1|AQP12A	-2
0	0	0	0	0	0	0	0	0	0	-2.6	0	0	0	0	0	0	0	0	0	0	0	0	0	0	0	0	0	0	0	PGB:00065	M00010000000000000000000	1	0	PaGenBase	36	Tissue-specific: Breast		-2.6	2.6	3.5	30293	150	928	12	1.3	0.37	2819|3852|3854|3887|5744|5959|9119|11228|55200|118430|341416|729025	GPD1|KRT5|KRT6B|KRT81|PTHLH|RDH5|KRT75|RASSF8|PLEKHG6|MUCL1|OR6C2|SLC15A5	-2
0	0	0	0	0	0	0	-2.6	0	0	0	0	0	0	0	0	0	0	0	0	0	0	0	0	0	0	0	0	0	0	PGB:00030	M10000000000000000000000	1	0	PaGenBase	36	Tissue-specific: prostate		-2.6	1.9	3.3	30293	213	1716	23	1.3	0.28	3713|4660|5865|5997|6003|6698|29937|51702|55092|64407|64600|65979|79590|84069|84958|85414|148327|149095|317705|353135|391189|401934|448835	IVL|PPP1R12B|RAB3B|RGS2|RGS13|SPRR1A|NENF|PADI3|TMEM51|RGS18|PLA2G2F|PHACTR4|MRPL24|PLEKHN1|SYTL1|SLC45A3|CREB3L4|DCST1|VN1R5|LCE1E|OR11L1|RNF223|LCE6A	-2
0	0	0	0	0	0	0	0	0	0	-2.2	0	0	0	0	0	0	0	0	0	0	0	-2.6	0	0	0	0	0	0	0	PGB:00008	M00010000000000010000000	2	0	PaGenBase	36	Tissue-specific: small intestine		-2.6	2.7	3.6	30293	128	948	11	1.2	0.35	13|1371|1524|2771|4311|5948|6476|7433|10039|51554|54716	AADAC|CPOX|CX3CR1|GNAI2|MME|RBP2|SI|VIPR1|PARP3|ACKR4|SLC6A20	-2
0	0	0	0	0	0	0	0	0	0	0	0	0	0	0	-2.6	0	0	0	0	0	0	0	0	0	0	0	0	0	0	PGB:00101	M00000000100000000000000	1	0	PaGenBase	36	Tissue-specific: Colorectal adenocarcinoma		-2.6	4.3	4	30293	41	1024	6	0.59	0.24	3216|3217|4642|4804|7153|25984	HOXB6|HOXB7|MYO1D|NGFR|TOP2A|KRT23	-2
0	0	0	0	0	1	0	0	0	0	0	0	0	0	0	0	0	0	0	0	0	0	0	0	0	0	0	0	-2.6	0	PGB:00126	M00000000000000000000010	1	0	PaGenBase	36	Cell-specific: Testis cell		-2.6	6.9	4.6	30293	26	671	4	0.6	0.3	5727|5887|8577|100526694	PTCH1|RAD23B|TMEFF1|MSANTD3-TMEFF1	-2
0	0	0	0	0	0	0	0	0	0	0	0	0	0	0	0	0	0	0	0	0	0	-2.5	0	0	0	0	0	0	0	PGB:00154	M00000000000000010000000	1	0	PaGenBase	36	Cell-specific: HOP92		-2.5	9.6	4.9	30293	10	948	3	0.32	0.18	5918|7433|57088	RARRES1|VIPR1|PLSCR4	-2
0	0	0	0	0	0	0	-2.5	0	0	0	0	0	0	0	0	0	0	0	0	0	0	0	0	0	0	0	0	0	0	PGB:00185	M10000000000000000000000	1	0	PaGenBase	36	Cell-specific: M14		-2.5	8.8	4.7	30293	6	1716	3	0.17	0.1	864|25778|55283	RUNX3|DSTYK|MCOLN3	-2
1	0	0	0	0	0	0	0	0	0	0	0	0	0	0	0	0	0	0	0	0	0	0	-2.5	0	0	0	0	0	0	PGB:00114	M00000000000000001000000	1	0	PaGenBase	36	Tissue-specific: Testis Intersitial		-2.5	4.9	4	30293	44	696	5	0.72	0.32	2712|5161|22824|85438|132851	GK2|PDHA2|HSPA4L|CABS1|SPATA4	-1.9
0	0	0	0	0	0	0	-2.5	0	0	0	0	0	0	0	0	0	0	0	0	0	0	0	0	0	0	0	0	0	0	PGB:00132	M10000000000000000000000	1	0	PaGenBase	36	Cell-specific: HT1080		-2.5	5.9	4.1	30293	12	1716	4	0.23	0.12	3290|7075|11009|192669	HSD11B1|TIE1|IL24|AGO3	-1.9
0	1	0	0	0	0	0	0	0	0	0	0	0	0	0	0	0	0	0	0	0	0	0	0	-2.4	0	0	0	0	0	PGB:00066	M00000000000000000100000	1	0	PaGenBase	36	Cell-specific: T-lymphoblast		-2.4	4	3.8	30293	61	737	6	0.81	0.33	2533|6932|7903|51735|285672|401207	FYB1|TCF7|ST8SIA4|RAPGEF6|SREK1IP1|C5orf63	-1.9
0	0	0	0	0	0	0	-2.3	0	0	0	0	0	0	0	0	0	0	0	0	0	0	0	0	0	0	0	0	0	0	PGB:00086	M10000000000000000000000	1	0	PaGenBase	36	Cell-specific: Lymphoma burkitts Daudi		-2.3	3	3.4	30293	47	1716	8	0.47	0.16	325|8564|9214|9636|9674|9783|26097|127544	APCS|KMO|FCMR|ISG15|KIAA0040|RIMS3|CHTOP|RNF19B	-1.9
0	0	1	0	0	0	0	0	0	0	0	0	0	0	0	0	0	0	0	0	0	0	0	0	0	-2.3	0	0	0	0	PGB:00145	M00000000000000000010000	1	0	PaGenBase	36	Tissue-specific: Corpus		-2.3	5.6	4	30293	26	827	4	0.48	0.24	9053|23097|23328|93643	MAP7|CDK19|SASH1|TJAP1	-1.8
0	0	0	0	0	1	0	0	0	0	-2	0	0	0	0	0	0	0	0	0	0	0	0	0	0	0	0	0	-2.3	0	PGB:00022	M00010000000000000000010	2	0	PaGenBase	36	Tissue-specific: adrenal gland		-2.3	2.5	3.1	30293	201	671	11	1.6	0.49	1621|2516|3443|5079|7357|26468|56033|138882|347168|389761|389762	DBH|NR5A1|IFNA6|PAX5|UGCG|LHX6|BARX1|OR1N2|OR1J1|SPATA31D4|SPATA31D3	-1.8
0	0	0	0	0	0	0	0	0	0	-2	0	0	0	0	-2.3	0	0	0	0	0	0	0	0	0	0	0	0	0	0	PGB:00060	M00010000100000000000000	2	0	PaGenBase	36	Tissue-specific: retinoblastoma		-2.3	2.7	3.2	30293	97	1024	9	0.88	0.29	332|990|1984|2535|3682|4843|5986|7077|7083	BIRC5|CDC6|EIF5A|FZD2|ITGAE|NOS2|RFNG|TIMP2|TK1	-1.8
0	0	1	0	0	0	0	0	0	0	0	0	0	0	0	0	0	0	0	0	-2	0	0	0	0	-2	0	0	0	0	PGB:00020	M00000000000001000010000	2	0	PaGenBase	36	Tissue-specific: retina		-2	4.9	3.5	30293	130	191	4	2.1	1	1409|5121|53820|54102	CRYAA|PCP4|RIPPLY3|CLIC6	-1.7
0	0	0	0	0	0	0	-2	0	0	0	0	0	0	0	0	0	0	0	0	0	0	0	0	0	0	0	0	0	0	PGB:00184	M10000000000000000000000	1	0	PaGenBase	36	Cell-specific: SR		-2	3.2	3.1	30293	33	1716	6	0.35	0.14	943|1901|3142|3570|9047|55509	TNFRSF8|S1PR1|HLX|IL6R|SH2D2A|BATF3	-1.7
[truncated: 1 more columns]

## Sheet: Supplementary Tabl4
Supplementary Table 4. The top100 enriched result terms for input genes within Complex_Region by using Non-Complex_Region as a reference between each chromosome in the human genome.
GO	Description	_LogP_Chr1(1767)	_LogP_Chr10(701)	_LogP_Chr11(1121)	_LogP_Chr12(965)	_LogP_Chr13(279)	_LogP_Chr14(577)	_LogP_Chr15(529)	_LogP_Chr16(618)	_LogP_Chr17(1061)	_LogP_Chr18(229)	_LogP_Chr19(1290)	_LogP_Chr2(1070)	_LogP_Chr20(516)	_LogP_Chr21(197)	_LogP_Chr22(366)	_LogP_Chr3(982)	_LogP_Chr4(711)	_LogP_Chr5(755)	_LogP_Chr6(858)	_LogP_Chr7(834)	_LogP_Chr8(632)	_LogP_Chr9(693)	_LogP_Complex_Region	Min_P-value
GO:0007156	homophilic cell adhesion via plasma membrane adhesion molecules	0	0	0	0	0	0	0	0	0	-7.30446	0	0	0	0	0	0	0	-2.09843	0	0	0	0	-26.8972	-26.8972
WP5221	2q11 2 copy number variation syndrome	0	0	0	0	0	0	0	0	0	0	0	0	0	0	0	0	0	0	0	0	0	0	-14.2069	-14.2069
hsa04612	Antigen processing and presentation	0	0	0	-2.57483	0	0	0	0	0	0	0	0	0	0	0	0	0	0	-3.5633	0	0	0	-12.9757	-12.9757
hsa04145	Phagosome	0	-2.11029	0	-3.0751	0	0	0	0	0	0	0	0	0	0	0	0	0	0	-2.50429	0	0	0	-12.5503	-12.5503
hsa05020	Prion disease	0	0	0	0	0	0	0	0	0	0	0	0	0	0	0	0	0	0	0	0	0	0	-12.0076	-12.0076
R-HSA-198933	Immunoregulatory interactions between a Lymphoid and a non-Lymphoid cell	0	0	0	-3.08465	0	0	0	0	0	0	-6.46999	0	0	0	0	0	0	0	-2.44218	0	0	0	-11.1567	-11.1567
R-HSA-1280215	Cytokine Signaling in Immune system	-3.86951	0	-2.54162	-2.37556	0	-2.1967	0	0	-4.1573	0	0	-4.22526	0	0	0	-2.00996	0	-2.44999	-4.47306	0	0	-3.71602	-10.8031	-10.8031
R-HSA-1461973	Defensins	0	0	0	0	0	0	0	0	0	0	0	0	-3.77337	0	0	0	0	0	0	0	-9.70751	0	-10.7762	-10.7762
WP4932	7q11 23 copy number variation syndrome	0	0	0	-2.2473	0	0	0	0	0	0	0	0	0	0	0	0	0	0	0	0	0	0	-10.5335	-10.5335
WP5362	TAR syndrome	0	0	0	0	0	0	0	0	0	0	0	0	0	0	0	0	0	0	0	0	0	0	-10.2447	-10.2447
WP5346	8p23 1 copy number variation syndrome	0	0	0	0	0	0	0	0	0	0	0	0	0	0	0	0	0	0	0	0	-9.18861	0	-9.83795	-9.83795
GO:0045087	innate immune response	-8.39704	0	-2.92399	-3.27561	0	0	0	0	-2.26081	0	0	0	-6.08701	0	-2.04288	0	0	0	-8.52855	0	0	-6.51706	-9.016	-9.016
GO:0010638	positive regulation of organelle organization	0	0	0	-3.35583	0	0	0	0	0	0	0	-3.13673	0	0	-2.63642	0	-2.49189	-3.54033	0	0	0	0	-8.84424	-8.84424
WP4950	16p11 2 distal deletion syndrome	0	0	0	0	0	0	0	0	0	0	0	0	0	0	0	0	0	0	0	0	0	0	-8.45482	-8.45482
GO:0018193	peptidyl-amino acid modification	-2.97557	-2.29338	0	0	0	0	0	-3.06746	0	0	-2.80222	-4.28899	0	0	0	-2.81151	0	-2.51181	0	0	-2.98305	0	-8.056	-8.056
WP4942	15q13 3 copy number variation syndrome	0	0	0	0	0	0	0	0	0	0	0	0	0	0	0	0	0	0	0	0	0	0	-8.02043	-8.02043
GO:0072657	protein localization to membrane	0	0	0	0	0	-2.85729	0	0	0	0	-2.04545	-2.94389	0	0	0	-4.73939	0	0	0	0	0	0	-7.46287	-7.46287
GO:0051129	negative regulation of cellular component organization	0	0	0	-3.83062	0	0	-4.39372	-2.32886	-4.71418	0	0	0	0	0	0	-6.31057	0	0	0	0	0	0	-6.86602	-6.86602
GO:0002706	regulation of lymphocyte mediated immunity	-4.22699	0	0	-3.16619	0	0	0	0	0	0	0	0	0	0	0	0	0	0	-3.6882	0	0	0	-6.86164	-6.86164
GO:0061024	membrane organization	-4.13928	0	0	0	0	0	-2.05782	-2.10799	-4.57263	-5.41681	-2.47544	-2.25875	0	0	0	-2.04232	0	-3.91804	0	-2.17977	-3.5435	0	-6.84975	-6.84975
hsa05168	Herpes simplex virus 1 infection	0	0	0	0	0	0	0	0	0	0	-100	0	0	0	0	0	0	0	0	0	0	-4.45296	-20.8199	-100
GO:0050778	positive regulation of immune response	-8.42922	0	0	-4.93057	0	0	0	0	0	0	-2.56914	0	0	0	0	0	-2.92553	-3.83844	-4.62105	0	0	0	-7.09638	-8.42922
R-HSA-1461957	Beta defensins	0	0	0	0	0	0	0	0	0	0	0	0	-4.32989	0	0	0	0	0	0	0	-10.9664	0	-7.08452	-10.9664
GO:0009991	response to extracellular stimulus	-4.59523	0	0	-3.31345	0	0	0	0	-7.00527	0	0	-3.09382	0	0	-3.05597	0	0	0	0	-2.06491	0	0	-6.67118	-7.00527
GO:0098657	import into cell	0	0	0	-2.8998	0	0	-3.40649	0	-7.14755	0	-3.04258	-5.08347	0	0	-2.40815	-2.7403	0	-3.17215	0	0	0	-4.23447	-5.7192	-7.14755
GO:0009617	response to bacterium	-5.60099	0	0	0	0	-3.81643	0	0	0	0	0	0	-9.5772	0	0	0	-10.4657	0	-2.91789	0	-5.62553	0	-5.43715	-10.4657
WP5345	1p36 copy number variation syndrome	-23.3029	0	0	0	0	0	0	0	0	0	0	0	0	0	0	0	0	0	0	0	0	0	-4.6903	-23.3029
GO:0006631	fatty acid metabolic process	-3.09008	-7.56352	0	0	0	0	0	0	0	0	0	0	0	0	0	0	-5.6961	0	0	0	0	0	-4.37939	-7.56352
GO:0002486	antigen processing and presentation of endogenous peptide antigen via MHC class I via ER pathway, TAP-independent	0	0	0	0	0	0	0	0	0	0	0	0	0	0	0	0	0	0	-8.49992	0	0	0	-4.08925	-8.49992
GO:0042742	defense response to bacterium	-3.70247	0	0	-3.17458	0	-3.61842	0	0	0	0	0	0	-13.9708	0	0	0	-3.91613	0	-3.83381	0	-4.25885	0	-3.82682	-13.9708
WP5380	5q35 copy number variation	0	0	0	0	0	0	0	0	0	0	0	0	0	0	0	0	0	-27.349	0	0	0	0	-3.69524	-27.349
GO:0006790	sulfur compound metabolic process	0	0	0	0	0	0	0	-6.78057	0	0	0	-2.32356	0	0	0	0	-4.04526	0	0	0	0	0	-3.15368	-6.78057
R-HSA-3214815	HDACs deacetylate histones	0	0	0	0	0	0	0	0	0	0	0	0	0	0	0	0	0	0	-50.5659	0	0	0	-2.80264	-50.5659
GO:0044403	biological process involved in symbiotic interaction	0	0	0	0	-2.00878	0	0	0	0	-3.06516	0	0	0	0	0	-8.75952	0	0	0	0	0	0	-2.77372	-8.75952
hsa00982	Drug metabolism - cytochrome P450	0	-2.24409	0	0	0	0	0	0	0	0	0	-3.75063	0	0	0	0	-14.6641	0	0	0	0	0	-2.16331	-14.6641
WP5287	17q12 copy number variation syndrome	0	0	0	0	0	0	0	0	-100	0	0	0	0	0	0	0	0	0	0	0	0	0	-2.0921	-100
R-HSA-9752946	Expression and translocation of olfactory receptors	-10.8193	0	-100	0	0	0	0	0	0	0	0	0	0	0	0	0	0	0	0	0	0	-6.36941	0	-100
WP5224	2q37 copy number variation syndrome	0	0	0	0	0	0	0	0	0	0	0	-75.4545	0	0	0	0	0	0	0	0	0	0	0	-75.4545
R-HSA-6805567	Keratinization	-6.78791	0	0	-9.25568	0	0	0	0	-36.1456	-2.96302	0	0	0	-51.7232	0	0	0	0	0	0	0	0	0	-51.7232
WP4657	22q11 2 copy number variation syndrome	0	-2.08378	0	0	0	0	0	0	0	0	0	0	0	0	-42.3596	0	0	0	0	0	0	0	0	-42.3596
WP5402	10q22q23 copy number variation	0	-27.0997	0	0	0	0	0	0	0	0	0	0	0	0	0	0	0	0	0	0	0	0	0	-27.0997
GO:0033141	positive regulation of peptidyl-serine phosphorylation of STAT protein	0	0	0	0	0	0	0	0	0	0	0	0	0	0	0	0	0	0	0	0	0	-25.1853	0	-25.1853
WP4949	16p11 2 proximal deletion syndrome	0	0	0	0	0	0	0	-24.9174	0	0	0	0	0	0	0	0	0	0	0	0	0	0	0	-24.9174
WP5408	15q25 copy number variation	0	0	0	0	0	0	-24.8626	0	0	0	0	0	0	0	0	0	0	0	0	0	0	0	0	-24.8626
WP5222	2q13 copy number variation syndrome	0	0	0	0	0	0	0	0	0	0	0	-23.7865	0	0	0	0	0	0	0	0	0	0	0	-23.7865
GO:0045109	intermediate filament organization	0	0	0	-19.223	0	0	0	0	-21.8881	0	0	0	0	0	0	0	0	0	0	0	0	0	0	-21.8881
GO:0031424	keratinization	-19.4982	0	0	-18.9959	0	0	0	0	0	0	0	0	0	0	0	0	0	0	0	0	0	0	0	-19.4982
R-HSA-5661231	Metallothioneins bind metals	0	0	0	0	0	0	0	-18.8553	0	0	0	0	0	0	0	0	0	0	0	0	0	0	0	-18.8553
WP5352	10q11 21q11 23 copy number variation syndrome	0	-16.3099	0	0	0	0	0	0	0	0	0	0	0	0	0	0	0	0	0	0	0	0	0	-16.3099
WP5348	11p11 2 copy number variation syndrome	0	0	-15.787	0	0	0	0	0	0	0	0	0	0	0	0	0	0	0	0	0	0	0	0	-15.787
WP4906	3q29 copy number variation syndrome	0	0	0	0	0	0	0	0	0	0	0	0	0	0	0	-15.6288	0	0	0	0	0	0	0	-15.6288
R-HSA-6809371	Formation of the cornified envelope	-12.8215	0	0	-14.6461	0	0	0	0	-14.5229	-4.30265	0	0	0	0	0	0	0	0	0	0	0	0	0	-14.6461
R-HSA-5689880	Ub-specific processing proteases	0	0	0	0	0	-2.58229	0	0	-2.87653	0	0	0	0	0	0	0	-7.3782	0	-13.9568	0	0	0	0	-13.9568
WP5365	4p16 3 copy number variation	0	0	0	0	0	0	0	0	0	0	0	0	0	0	0	0	-12.9851	0	0	0	0	0	0	-12.9851
WP5381	Smith Magenis and Potocki Lupski syndrome copy number variation	0	0	0	-2.42837	0	0	0	0	-12.124	0	0	0	0	0	0	0	0	0	0	0	0	0	0	-12.124
GO:0070383	DNA cytosine deamination	0	0	0	0	0	0	0	0	0	0	0	0	0	0	-12.0392	0	0	0	0	0	0	0	0	-12.0392
hsa04742	Taste transduction	0	0	0	-11.93	0	0	0	0	0	0	0	0	0	0	0	0	0	0	0	-4.78424	0	0	0	-11.93
WP3998	Prader Willi and Angelman syndrome	0	0	0	0	0	0	-11.3892	0	0	0	0	0	0	0	0	0	0	0	0	0	0	0	0	-11.3892
GO:0051123	RNA polymerase II preinitiation complex assembly	0	0	0	0	0	0	0	0	0	0	0	0	0	0	0	0	0	-10.8715	0	0	0	0	0	-10.8715
GO:0072677	eosinophil migration	0	0	0	0	0	0	0	0	-10.6434	0	0	0	0	0	0	0	0	0	0	0	0	0	0	-10.6434
GO:0048598	embryonic morphogenesis	-2.80001	-3.04396	0	-2.34393	0	0	0	0	-5.33799	0	0	-10.6236	-2.03991	0	0	-3.33646	-2.02557	0	-2.78253	-4.00015	-2.16472	0	0	-10.6236
R-HSA-211935	Fatty acids	-2.07238	0	0	0	0	0	0	0	0	0	-10.6067	0	0	0	0	0	0	0	0	0	0	0	0	-10.6067
R-HSA-372790	Signaling by GPCR	-4.77318	0	-2.20375	-4.05013	0	0	0	0	-3.45003	0	-2.55798	-3.53937	-2.1116	0	0	-10.4481	-3.26141	-3.16197	0	-8.45789	0	0	0	-10.4481
GO:0009792	embryo development ending in birth or egg hatching	0	0	0	-2.78228	0	-2.46359	0	0	-10.1348	0	0	-5.05279	-2.07737	0	-3.48111	0	0	0	-2.48876	-3.60939	-4.88863	0	0	-10.1348
M3468	NABA ECM REGULATORS	0	-2.50772	-3.37485	0	0	-4.99855	0	0	0	-6.64273	0	0	-10.041	0	0	-3.26294	0	0	0	0	-3.00601	0	0	-10.041
GO:0006069	ethanol oxidation	0	0	0	0	0	0	0	0	0	0	0	0	0	0	0	0	-9.94513	0	0	0	0	0	0	-9.94513
GO:0016579	protein deubiquitination	0	0	0	0	0	0	0	0	0	0	0	0	0	0	0	0	-9.61163	0	0	0	-2.33219	0	0	-9.61163
R-HSA-422475	Axon guidance	-2.85891	0	0	0	0	-2.12622	0	0	-3.18104	0	-2.52272	-3.94507	0	0	0	-9.11104	0	-3.25639	0	0	0	-2.19005	0	-9.11104
GO:0051552	flavone metabolic process	0	0	0	0	0	0	0	0	0	0	0	-8.77689	0	0	0	0	0	0	0	0	0	0	0	-8.77689
GO:0031344	regulation of cell projection organization	-2.99794	0	0	0	0	0	-4.1434	0	-2.56024	0	0	-5.00327	0	0	0	-8.58821	0	0	-3.95223	-3.26066	0	-2.05838	0	-8.58821
WP4320	Effect of progerin on genes involved in Hutchinson Gilford progeria syndrome	0	0	0	0	0	0	0	0	-2.85586	0	0	0	0	0	0	0	0	0	-8.58034	0	0	0	0	-8.58034
GO:0031175	neuron projection development	0	-8.5697	0	0	-4.32193	0	-2.84137	0	0	0	0	-3.49056	0	0	0	-6.17173	0	-2.74285	0	-6.2081	0	0	0	-8.5697
GO:0002683	negative regulation of immune system process	-8.3101	0	-2.33801	0	0	0	0	0	-2.46581	0	0	0	0	0	0	-2.66676	0	0	-2.03169	0	0	0	0	-8.3101
GO:0050913	sensory perception of bitter taste	0	0	0	-7.543	0	0	0	0	0	0	0	0	0	0	0	-2.05771	0	0	0	-8.20464	0	0	0	-8.20464
WP4905	1q21 1 copy number variation syndrome	-8.08428	0	0	0	0	0	0	0	0	0	0	0	0	0	0	0	0	0	0	0	0	0	0	-8.08428
GO:0002455	humoral immune response mediated by circulating immunoglobulin	-8.04544	0	0	0	0	0	0	0	0	0	0	0	0	0	0	0	0	0	0	0	0	0	0	-8.04544
R-HSA-4086400	PCP/CE pathway	0	0	0	0	0	-4.29041	0	0	-7.95124	0	0	0	0	0	0	0	0	0	0	0	0	0	0	-7.95124
GO:1990840	response to lectin	0	0	0	-7.89629	0	0	0	0	0	0	0	0	0	0	0	0	0	0	0	0	0	0	0	-7.89629
GO:0007610	behavior	0	0	0	0	0	0	-4.77284	0	-7.87672	0	0	-6.00226	-3.17479	0	-3.03611	0	0	-4.61877	-2.4598	-2.38273	0	0	0	-7.87672
GO:0015848	spermidine transport	0	0	0	0	0	0	0	0	0	0	0	0	0	0	0	0	0	0	-7.8243	0	0	0	0	-7.8243
GO:0042303	molting cycle	0	0	0	0	0	0	0	0	-7.73262	0	0	0	0	0	0	0	0	0	0	0	0	0	0	-7.73262
R-HSA-5260271	Diseases of Immune System	0	0	0	0	0	0	0	0	0	0	0	0	0	0	0	0	-7.66285	0	0	0	0	0	0	-7.66285
R-HSA-202733	Cell surface interactions at the vascular wall	-2.71028	0	0	0	0	0	0	0	0	0	-7.57667	-3.02231	-2.69096	0	-2.95694	0	0	0	0	0	0	0	0	-7.57667
R-HSA-1234176	Oxygen-dependent proline hydroxylation of Hypoxia-inducible Factor Alpha	0	0	0	0	0	-7.49086	0	0	-2.77455	0	0	0	0	0	0	0	0	0	0	0	0	0	0	-7.49086
GO:0030001	metal ion transport	-2.89311	0	-3.28727	-7.49039	-3.73029	0	0	0	0	0	0	-3.64952	-2.64215	0	0	-6.40242	-2.15388	-2.39481	0	0	0	0	0	-7.49039
GO:0010951	negative regulation of endopeptidase activity	0	0	0	0	0	-4.67792	0	0	0	-7.48968	0	0	-4.34918	0	0	-3.81234	0	0	0	0	0	0	0	-7.48968
GO:0006030	chitin metabolic process	-7.48454	0	0	0	0	0	0	0	0	0	0	0	0	0	0	0	0	0	0	0	0	0	0	-7.48454
R-HSA-192456	Digestion of dietary lipid	0	-7.47086	0	0	0	0	0	0	0	0	0	0	0	0	0	0	0	0	0	0	0	0	0	-7.47086
R-HSA-9700206	Signaling by ALK in cancer	0	0	0	0	0	0	0	0	0	0	0	-7.45859	0	0	0	0	0	0	0	0	0	0	0	-7.45859
GO:0050830	defense response to Gram-positive bacterium	-2.55894	0	0	0	0	-7.40034	0	0	0	0	0	0	0	0	0	0	0	0	-4.0184	0	-3.23921	0	0	-7.40034
hsa04972	Pancreatic secretion	-7.31254	0	0	0	0	0	0	0	0	0	0	0	0	0	0	0	0	0	0	-2.81336	0	0	0	-7.31254
WP5401	7q11 23 distal copy number variation	0	0	0	0	0	0	0	0	0	0	0	0	0	0	0	0	0	0	0	-7.27878	0	0	0	-7.27878
WP129	Matrix metalloproteinases	0	0	-7.26055	0	0	0	0	0	0	0	0	0	0	0	0	0	0	0	0	0	0	0	0	-7.26055
GO:0006259	DNA metabolic process	0	-3.46539	-2.30634	-2.81977	0	-4.35872	-2.29093	-7.20187	-2.7944	0	-2.82229	-3.11712	0	0	-3.58351	0	0	0	-2.14237	0	-3.13014	0	0	-7.20187
GO:0008283	cell population proliferation	0	-2.0477	0	-5.59561	-2.42575	0	0	0	-3.3338	0	0	-2.17108	0	0	0	-3.71847	-2.48328	-4.65888	0	-2.19056	-7.16482	-6.82894	0	-7.16482
GO:0009314	response to radiation	-2.26349	0	-7.09018	0	0	0	-3.56331	0	-2.3152	0	0	-2.48835	0	0	0	-2.43492	0	-2.43957	0	0	-3.51454	0	0	-7.09018
GO:1901888	regulation of cell junction assembly	0	0	0	0	0	0	0	0	0	0	0	0	0	0	0	-7.08686	0	0	0	0	-2.41106	0	0	-7.08686
R-HSA-2559584	Formation of Senescence-Associated Heterochromatin Foci (SAHF)	0	0	0	0	0	0	0	0	0	0	0	0	0	0	-3.11588	0	0	0	-6.99276	0	0	0	0	-6.99276
WP536	Calcium regulation in cardiac cells	-6.93503	0	0	0	0	0	0	0	0	0	0	0	0	0	0	0	0	0	0	-2.13698	0	0	0	-6.93503
GO:0060416	response to growth hormone	0	0	0	0	0	0	0	0	-6.93253	0	0	0	0	0	0	0	0	0	0	0	0	0	0	-6.93253

## Sheet: Supplementary Table5
Supplementary Table 5. The summary of enrichment results in DisGeNET by using genes within Non-Complex_Region as a reference for Complex_Region genes in each chromosome of the human genome.
_MEMBER_Chr1(1767)	_MEMBER_Chr10(701)	_MEMBER_Chr11(1121)	_MEMBER_Chr12(965)	_MEMBER_Chr13(279)	_MEMBER_Chr14(577)	_MEMBER_Chr15(529)	_MEMBER_Chr16(618)	_MEMBER_Chr17(1061)	_MEMBER_Chr18(229)	_MEMBER_Chr19(1290)	_MEMBER_Chr2(1070)	_MEMBER_Chr20(516)	_MEMBER_Chr21(197)	_MEMBER_Chr22(366)	_MEMBER_Chr3(982)	_MEMBER_Chr4(711)	_MEMBER_Chr5(755)	_MEMBER_Chr6(858)	_MEMBER_Chr7(834)	_MEMBER_Chr8(632)	_MEMBER_Chr9(693)	_MEMBER_Complex_Region	_LogP_Chr1(1767)	_LogP_Chr10(701)	_LogP_Chr11(1121)	_LogP_Chr12(965)	_LogP_Chr13(279)	_LogP_Chr14(577)	_LogP_Chr15(529)	_LogP_Chr16(618)	_LogP_Chr17(1061)	_LogP_Chr18(229)	_LogP_Chr19(1290)	_LogP_Chr2(1070)	_LogP_Chr20(516)	_LogP_Chr21(197)	_LogP_Chr22(366)	_LogP_Chr3(982)	_LogP_Chr4(711)	_LogP_Chr5(755)	_LogP_Chr6(858)	_LogP_Chr7(834)	_LogP_Chr8(632)	_LogP_Chr9(693)	_LogP_Complex_Region	GO	_PATTERN_	_RANK_	GiniIndex
0	0	0	0	0	0	0	0	0	0	0	0	0	0	0	0	0	0	1	0	0	0	1	0	0	0	0	0	0	0	0	0	0	0	0	0	0	0	0	0	0	-3.7	0	0	0	-14	C1836231	M00000000000000000010001	2	0
0	0	0	0	0	0	0	0	0	0	0	0	0	0	0	0	0	0	1	0	0	0	1	0	0	0	0	0	0	0	0	0	0	0	0	0	0	0	0	0	0	-3.7	0	0	0	-14	C1836232	M00000000000000000010001	2	0
0	0	0	0	0	0	0	0	0	0	0	0	0	0	0	0	0	0	1	0	0	0	1	0	0	0	0	0	0	0	0	0	0	0	0	0	0	0	0	0	0	-3.7	0	0	0	-14	C1836233	M00000000000000000010001	2	0
0	0	0	0	0	0	0	0	0	0	0	0	0	0	0	0	0	0	1	0	0	0	1	0	0	0	0	0	0	0	0	0	0	0	0	0	0	0	0	0	0	-3.6	0	0	0	-14	C1836230	M00000000000000000010001	2	0
1	0	0	0	0	0	0	0	0	0	0	1	0	0	0	0	1	0	0	0	0	0	1	-3.3	0	0	0	0	0	0	0	0	0	0	-2.1	0	0	0	0	-3.6	0	0	0	0	0	-12	C0018213	M10000000000100001000001	4	0
0	0	0	0	0	0	0	0	0	0	0	0	0	0	0	0	0	0	0	1	0	0	1	0	0	0	0	0	0	0	0	0	0	0	0	0	0	0	0	0	0	0	-3.4	0	0	-12	C0175702	M00000000000000000001001	2	0
0	0	0	0	0	0	0	0	0	0	0	0	0	0	0	0	0	0	0	0	0	0	1	0	0	0	0	0	0	0	0	0	0	0	0	0	0	0	0	0	0	0	0	0	0	-11	C0577608	M00000000000000000000001	1	0
0	0	0	0	0	0	0	0	0	0	0	1	0	0	1	0	1	0	1	0	0	1	1	0	0	0	0	0	0	0	0	0	0	0	-2.2	0	0	-2.2	0	-3.5	0	-3.8	0	0	-2.4	-11	C0026896	M00000000000100101010011	6	0
0	0	0	0	0	0	0	0	0	0	0	0	0	0	0	0	0	0	0	0	0	0	1	0	0	0	0	0	0	0	0	0	0	0	0	0	0	0	0	0	0	0	0	0	0	-10	C4025732	M00000000000000000000001	1	0
0	0	0	0	0	0	1	0	0	0	0	1	0	0	0	1	1	1	1	0	0	0	1	0	0	0	0	0	0	-3.2	0	0	0	0	-7.8	0	0	0	-5.9	-3.3	-2.3	-2.2	0	0	0	-10	C0021704	M00000010000100011110001	7	0
1	0	0	0	0	0	0	0	0	0	0	0	0	0	0	0	1	1	0	0	0	1	1	-3	0	0	0	0	0	0	0	0	0	0	0	0	0	0	0	-4.2	-4.5	0	0	0	-3.8	-9.7	C0024530	M10000000000000001100011	5	0
0	0	0	0	0	0	0	0	0	0	0	0	0	0	0	0	0	0	0	0	0	0	1	0	0	0	0	0	0	0	0	0	0	0	0	0	0	0	0	0	0	0	0	0	0	-9.5	C0271196	M00000000000000000000001	1	0
0	1	1	0	0	0	0	0	0	0	0	0	0	0	0	0	0	0	0	0	0	0	1	0	-2.1	-2.8	0	0	0	0	0	0	0	0	0	0	0	0	0	0	0	0	0	0	0	-9.4	C0001948	M01100000000000000000001	3	0
0	0	0	0	0	0	0	0	0	0	0	0	0	0	0	0	1	0	0	0	0	0	1	0	0	0	0	0	0	0	0	0	0	0	0	0	0	0	0	-2.3	0	0	0	0	0	-8.8	C2747816	M00000000000000001000001	2	0
0	0	0	0	0	0	0	0	0	0	0	0	0	0	0	0	0	0	1	0	0	0	1	0	0	0	0	0	0	0	0	0	0	0	0	0	0	0	0	0	0	-2.7	0	0	0	-8.8	C0149745	M00000000000000000010001	2	0
0	0	0	0	0	0	0	0	0	0	0	0	0	0	0	0	0	0	0	0	0	0	1	0	0	0	0	0	0	0	0	0	0	0	0	0	0	0	0	0	0	0	0	0	0	-8.7	C0154835	M00000000000000000000001	1	0
0	0	0	0	0	0	0	0	0	0	0	0	0	0	0	0	0	0	0	0	0	0	1	0	0	0	0	0	0	0	0	0	0	0	0	0	0	0	0	0	0	0	0	0	0	-8.5	C4021569	M00000000000000000000001	1	0
0	0	1	0	0	0	0	0	1	0	0	1	0	0	0	1	0	0	0	0	1	0	1	0	0	-2.8	0	0	0	0	0	-3.9	0	0	-4.1	0	0	0	-2.6	0	0	0	0	-2.1	0	-8.4	C0019209	M00100000100100010000101	6	0
0	1	0	0	0	0	1	0	0	0	0	1	1	0	0	1	1	0	1	0	0	0	1	0	-2.3	0	0	0	0	-4.8	0	0	0	0	-3.5	-6.6	0	0	-2.1	-2.3	0	-3.5	0	0	0	-8.2	C0017654	M01000010000110011010001	8	0
0	0	0	0	0	0	0	1	0	0	0	0	0	0	0	0	0	0	0	0	0	0	1	0	0	0	0	0	0	0	-2.8	0	0	0	0	0	0	0	0	0	0	0	0	0	0	-8	C3665347	M00000001000000000000001	2	0
0	0	0	0	0	0	0	0	0	0	0	0	0	0	0	0	1	0	1	0	0	1	1	0	0	0	0	0	0	0	0	0	0	0	0	0	0	0	0	-4	0	-2.6	0	0	-2.3	-8	C0036202	M00000000000000001010011	4	0
0	0	0	0	0	0	0	0	0	1	0	0	0	0	0	0	0	0	0	0	0	0	1	0	0	0	0	0	0	0	0	0	-2.2	0	0	0	0	0	0	0	0	0	0	0	0	-7.9	C0263313	M00000000010000000000001	2	0
0	0	0	0	0	0	0	0	0	0	0	0	0	0	0	0	0	0	0	0	0	0	1	0	0	0	0	0	0	0	0	0	0	0	0	0	0	0	0	0	0	0	0	0	0	-7.9	C0041466	M00000000000000000000001	1	0
0	0	0	0	0	0	0	0	0	0	0	0	0	0	1	0	0	0	0	0	0	0	1	0	0	0	0	0	0	0	0	0	0	0	0	0	0	-2.4	0	0	0	0	0	0	0	-7.8	C1853141	M00000000000000100000001	2	0
0	0	1	0	0	1	0	0	0	0	0	0	0	0	0	1	1	0	1	0	0	0	1	0	0	-2.2	0	0	-2	0	0	0	0	0	0	0	0	0	-3.9	-5.3	0	-3.5	0	0	0	-7.8	C0242383	M00100100000000011010001	6	0
0	0	0	0	0	0	0	0	0	0	0	0	0	0	0	0	0	0	0	0	0	0	1	0	0	0	0	0	0	0	0	0	0	0	0	0	0	0	0	0	0	0	0	0	0	-7.7	C4021662	M00000000000000000000001	1	0
0	0	0	0	0	0	0	0	0	0	0	0	0	0	1	0	1	0	1	0	0	0	1	0	0	0	0	0	0	0	0	0	0	0	0	0	0	-2.2	0	-2.3	0	-7.3	0	0	0	-7.7	C0042900	M00000000000000101010001	4	0
0	0	0	0	0	0	0	0	0	0	0	0	0	0	0	0	0	0	0	0	0	0	1	0	0	0	0	0	0	0	0	0	0	0	0	0	0	0	0	0	0	0	0	0	0	-7.5	C0152191	M00000000000000000000001	1	0
0	0	0	0	0	0	0	0	0	0	0	0	0	0	0	0	0	0	0	0	0	0	1	0	0	0	0	0	0	0	0	0	0	0	0	0	0	0	0	0	0	0	0	0	0	-7.4	C0034880	M00000000000000000000001	1	0
1	0	0	0	0	0	0	0	0	0	0	1	0	0	0	0	0	1	1	0	0	0	1	-3	0	0	0	0	0	0	0	0	0	0	-2.1	0	0	0	0	0	-6.1	-6.5	0	0	0	-7.3	C0003872	M10000000000100000110001	5	0
0	0	0	0	0	0	0	0	0	0	0	1	0	0	0	0	0	0	0	0	0	0	1	0	0	0	0	0	0	0	0	0	0	0	-2.5	0	0	0	0	0	0	0	0	0	0	-7.2	C0200641	M00000000000100000000001	2	0
0	0	0	0	0	0	0	0	0	0	0	0	0	0	0	0	0	0	0	0	0	1	1	0	0	0	0	0	0	0	0	0	0	0	0	0	0	0	0	0	0	0	0	0	-2.4	-7.2	C0023343	M00000000000000000000011	2	0
0	1	0	0	0	0	0	0	0	0	0	1	0	0	0	0	0	0	0	0	0	0	1	0	-2.1	0	0	0	0	0	0	0	0	0	-2.8	0	0	0	0	0	0	0	0	0	0	-7.2	C0033687	M01000000000100000000001	3	0
0	0	0	0	0	0	0	0	0	0	0	0	0	0	0	0	0	0	0	0	0	0	1	0	0	0	0	0	0	0	0	0	0	0	0	0	0	0	0	0	0	0	0	0	0	-7	C4024897	M00000000000000000000001	1	0
0	0	0	0	0	0	0	0	0	0	0	0	0	0	0	0	0	0	0	0	0	0	1	0	0	0	0	0	0	0	0	0	0	0	0	0	0	0	0	0	0	0	0	0	0	-7	C4022012	M00000000000000000000001	1	0
0	0	0	0	0	0	0	0	0	0	0	0	0	0	0	0	0	0	0	0	0	0	1	0	0	0	0	0	0	0	0	0	0	0	0	0	0	0	0	0	0	0	0	0	0	-7	C1557375	M00000000000000000000001	1	0
0	0	0	0	0	0	0	0	0	0	0	0	0	0	0	0	0	0	0	0	0	0	1	0	0	0	0	0	0	0	0	0	0	0	0	0	0	0	0	0	0	0	0	0	0	-6.9	C0332606	M00000000000000000000001	1	0
0	0	0	0	0	0	0	0	0	0	0	0	0	0	0	0	0	0	0	0	0	0	1	0	0	0	0	0	0	0	0	0	0	0	0	0	0	0	0	0	0	0	0	0	0	-6.9	C0151205	M00000000000000000000001	1	0
0	0	0	0	0	0	0	0	0	0	0	0	0	0	0	0	0	0	0	0	0	0	1	0	0	0	0	0	0	0	0	0	0	0	0	0	0	0	0	0	0	0	0	0	0	-6.9	C4553313	M00000000000000000000001	1	0
0	0	1	1	0	0	0	0	1	0	0	0	0	0	1	0	0	0	0	0	1	0	1	0	0	-2.3	-2.9	0	0	0	0	-2.5	0	0	0	0	0	-2.1	0	0	0	0	0	-2.2	0	-6.9	C0025990	M00110000100000100000101	6	0
0	0	0	0	0	0	0	0	0	0	0	0	0	0	0	0	0	0	0	0	0	0	1	0	0	0	0	0	0	0	0	0	0	0	0	0	0	0	0	0	0	0	0	0	0	-6.9	C0751466	M00000000000000000000001	1	0
0	0	0	0	0	0	0	0	0	0	0	0	0	0	0	0	0	0	0	0	0	0	1	0	0	0	0	0	0	0	0	0	0	0	0	0	0	0	0	0	0	0	0	0	0	-6.9	C0001403	M00000000000000000000001	1	0
0	0	0	0	0	0	0	0	0	0	0	0	0	0	0	0	1	0	1	0	0	0	1	0	0	0	0	0	0	0	0	0	0	0	0	0	0	0	0	-2.7	0	-2.1	0	0	0	-6.7	C0017665	M00000000000000001010001	3	0
1	0	0	0	0	0	1	0	0	0	0	0	0	0	1	0	0	0	1	0	0	0	1	-2.1	0	0	0	0	0	-2.6	0	0	0	0	0	0	0	-2.8	0	0	0	-2.8	0	0	0	-6.7	C0039685	M10000010000000100010001	5	0
0	0	0	0	0	0	1	0	0	0	0	0	0	0	0	0	0	0	0	0	0	1	1	0	0	0	0	0	0	-2.2	0	0	0	0	0	0	0	0	0	0	0	0	0	0	-2.3	-6.7	C0003886	M00000010000000000000011	3	0
0	0	0	0	0	0	0	0	0	0	0	0	0	0	0	0	0	0	0	0	0	0	1	0	0	0	0	0	0	0	0	0	0	0	0	0	0	0	0	0	0	0	0	0	0	-6.7	C0020438	M00000000000000000000001	1	0
0	0	0	0	0	0	0	0	0	0	0	0	0	0	0	0	0	0	0	1	0	0	1	0	0	0	0	0	0	0	0	0	0	0	0	0	0	0	0	0	0	0	-2.3	0	0	-6.7	C0086445	M00000000000000000001001	2	0
0	0	0	0	0	0	0	0	0	0	0	0	0	0	1	0	0	0	0	0	0	0	1	0	0	0	0	0	0	0	0	0	0	0	0	0	0	-6.7	0	0	0	0	0	0	0	-4.6	C1843517	M00000000000000100000001	2	0
0	0	0	0	0	0	1	0	0	0	0	0	0	0	0	1	0	0	0	1	0	0	1	0	0	0	0	0	0	-2.1	0	0	0	0	0	0	0	0	-2.4	0	0	0	-2	0	0	-6.6	C1850049	M00000010000000010001001	4	0
0	0	0	0	0	0	0	0	0	0	0	0	0	0	0	0	0	0	0	0	0	0	1	0	0	0	0	0	0	0	0	0	0	0	0	0	0	0	0	0	0	0	0	0	0	-6.6	C0345030	M00000000000000000000001	1	0
0	0	0	0	0	0	0	0	0	0	0	0	0	0	0	0	1	0	1	0	0	0	1	0	0	0	0	0	0	0	0	0	0	0	0	0	0	0	0	-2.4	0	-2.4	0	0	0	-6.6	C0039263	M00000000000000001010001	3	0
0	0	0	1	0	0	0	0	0	0	0	0	0	0	1	1	1	0	1	1	0	0	1	0	0	0	-2.5	0	0	0	0	0	0	0	0	0	0	-2	-6.6	-2.6	0	-2.3	-2	0	0	-6.6	C3203102	M00010000000000111011001	7	0
0	0	0	0	0	0	0	0	1	0	0	0	0	0	0	0	1	0	0	0	0	0	1	0	0	0	0	0	0	0	0	-2.2	0	0	0	0	0	0	0	-2.7	0	0	0	0	0	-6.6	C0376480	M00000000100000001000001	3	0
0	0	0	0	0	0	0	0	0	0	0	1	0	0	0	0	0	0	0	0	0	0	1	0	0	0	0	0	0	0	0	0	0	0	-5.2	0	0	0	0	0	0	0	0	0	0	-6.6	C0031106	M00000000000100000000001	2	0
0	0	0	0	0	0	0	0	0	0	0	0	0	0	0	1	0	0	0	0	1	0	1	0	0	0	0	0	0	0	0	0	0	0	0	0	0	0	-5.6	0	0	0	0	-3.1	0	-6.5	C0541764	M00000000000000010000101	3	0
0	0	0	0	0	0	0	0	0	0	0	0	0	0	0	0	0	0	0	0	0	0	1	0	0	0	0	0	0	0	0	0	0	0	0	0	0	0	0	0	0	0	0	0	0	-6.5	C0344232	M00000000000000000000001	1	0
0	0	0	0	0	0	0	0	0	0	0	1	0	0	0	0	0	0	0	0	0	0	1	0	0	0	0	0	0	0	0	0	0	0	-2.3	0	0	0	0	0	0	0	0	0	0	-6.5	C0200633	M00000000000100000000001	2	0
0	0	0	0	0	0	0	0	0	0	0	0	0	0	0	0	0	0	0	0	0	0	1	0	0	0	0	0	0	0	0	0	0	0	0	0	0	0	0	0	0	0	0	0	0	-6.4	C0239676	M00000000000000000000001	1	0
0	0	0	0	0	0	0	0	0	0	0	0	0	0	0	0	0	0	0	0	0	0	1	0	0	0	0	0	0	0	0	0	0	0	0	0	0	0	0	0	0	0	0	0	0	-6.4	C4022386	M00000000000000000000001	1	0
0	0	0	0	0	0	0	0	0	0	0	0	0	0	0	0	0	0	0	0	0	0	1	0	0	0	0	0	0	0	0	0	0	0	0	0	0	0	0	0	0	0	0	0	0	-6.4	C4025788	M00000000000000000000001	1	0
0	0	0	0	0	0	0	0	0	0	0	0	0	0	0	0	0	0	0	0	0	0	1	0	0	0	0	0	0	0	0	0	0	0	0	0	0	0	0	0	0	0	0	0	0	-6.4	C4025898	M00000000000000000000001	1	0
0	0	0	0	1	0	0	0	0	0	0	0	0	0	0	0	0	0	0	0	0	0	1	0	0	0	0	-2.6	0	0	0	0	0	0	0	0	0	0	0	0	0	0	0	0	0	-6.3	C0152025	M00001000000000000000001	2	0
0	0	0	0	0	0	0	0	0	0	0	0	0	0	0	0	0	0	0	0	0	0	1	0	0	0	0	0	0	0	0	0	0	0	0	0	0	0	0	0	0	0	0	0	0	-6.3	C0032915	M00000000000000000000001	1	0
0	0	0	0	0	0	0	0	0	0	0	0	0	0	0	0	0	0	0	0	0	0	1	0	0	0	0	0	0	0	0	0	0	0	0	0	0	0	0	0	0	0	0	0	0	-6.3	C0559106	M00000000000000000000001	1	0
0	0	0	0	0	0	0	0	0	0	0	0	0	0	0	0	0	0	0	0	0	0	1	0	0	0	0	0	0	0	0	0	0	0	0	0	0	0	0	0	0	0	0	0	0	-6.3	C0856748	M00000000000000000000001	1	0
0	0	0	0	0	0	0	0	0	0	0	0	0	0	1	0	0	0	0	0	0	0	1	0	0	0	0	0	0	0	0	0	0	0	0	0	0	-5.6	0	0	0	0	0	0	0	-6.3	C1860475	M00000000000000100000001	2	0
0	0	0	0	0	1	1	1	0	0	0	1	0	0	0	0	0	1	0	0	0	1	1	0	0	0	0	0	-2.6	-2.7	-4.2	0	0	0	-5.6	0	0	0	0	0	-2.1	0	0	0	-4.9	-6.2	C0151889	M00000111000100000100011	7	0
0	0	0	0	0	0	0	0	0	0	0	0	0	0	0	0	0	0	0	0	0	0	1	0	0	0	0	0	0	0	0	0	0	0	0	0	0	0	0	0	0	0	0	0	0	-6.1	C4023676	M00000000000000000000001	1	0
0	0	0	0	0	0	0	0	0	0	0	0	0	1	0	0	1	0	0	0	0	0	1	0	0	0	0	0	0	0	0	0	0	0	0	0	-58	0	0	-2.5	0	0	0	0	0	-5.3	C0013080	M00000000000001001000001	3	0
0	0	0	0	0	0	0	0	0	0	0	0	0	1	0	0	1	0	0	0	0	0	1	0	0	0	0	0	0	0	0	0	0	0	0	0	-57	0	0	-2.4	0	0	0	0	0	-4.7	C4521042	M00000000000001001000001	3	0
0	0	0	0	0	0	0	1	1	0	0	0	0	0	1	0	0	0	1	0	0	0	1	0	0	0	0	0	0	0	-3.4	-2.3	0	0	0	0	0	-4.1	0	0	0	-19	0	0	0	-13	C4528257	M00000001100000100010001	5	0
0	0	1	1	0	0	1	0	0	0	0	0	1	0	0	1	1	0	0	0	0	0	1	0	0	-15	-3.7	0	0	-2.3	0	0	0	0	0	-2	0	0	-2.4	-2.1	0	0	0	0	0	-7.3	C0392885	M00110010000010011000001	7	0
0	0	0	0	0	0	0	0	0	0	0	0	0	0	0	0	0	0	1	0	0	0	1	0	0	0	0	0	0	0	0	0	0	0	0	0	0	0	0	0	0	-14	0	0	0	-7.6	C0008074	M00000000000000000010001	2	0
0	0	1	0	0	0	0	0	0	0	0	0	0	0	0	0	0	0	0	0	0	0	1	0	0	-13	0	0	0	0	0	0	0	0	0	0	0	0	0	0	0	0	0	0	0	-2.2	C0004903	M00100000000000000000001	2	0
0	0	0	0	0	0	0	0	1	0	0	0	0	0	0	1	0	0	1	0	1	1	1	0	0	0	0	0	0	0	0	-2.3	0	0	0	0	0	0	-12	0	0	-9.3	0	-2.4	-2.1	-4.4	C0149782	M00000000100000010010111	6	0
1	1	0	0	0	0	0	0	1	0	0	1	0	0	0	0	0	0	1	0	0	1	1	-12	-2.4	0	0	0	0	0	0	-2.7	0	0	-4.2	0	0	0	0	0	0	-2.1	0	0	-2.8	-4.1	C0023508	M11000000100100000010011	7	0
0	0	0	0	0	0	0	0	0	0	0	0	0	0	1	0	0	0	0	0	0	0	1	0	0	0	0	0	0	0	0	0	0	0	0	0	0	-12	0	0	0	0	0	0	0	-3.5	C0546967	M00000000000000100000001	2	0
0	0	0	0	0	0	1	0	0	0	0	0	0	0	0	0	0	0	0	0	0	0	1	0	0	0	0	0	0	-11	0	0	0	0	0	0	0	0	0	0	0	0	0	0	0	-2	C0162635	M00000010000000000000001	2	0
0	0	1	0	0	0	0	0	0	0	1	0	0	0	0	0	0	0	0	0	0	0	1	0	0	-10	0	0	0	0	0	0	0	-2.3	0	0	0	0	0	0	0	0	0	0	0	-5.9	C0428472	M00100000001000000000001	3	0
0	0	0	0	0	0	0	0	0	0	0	0	1	1	0	0	0	0	0	0	0	0	1	0	0	0	0	0	0	0	0	0	0	0	0	-2.6	-10	0	0	0	0	0	0	0	0	-3.1	C0751785	M00000000000011000000001	3	0
0	0	0	0	0	0	0	0	0	0	0	1	0	0	0	0	1	0	1	0	0	0	1	0	0	0	0	0	0	0	0	0	0	0	-7.3	0	0	0	0	-2.5	0	-9.3	0	0	0	-5	C0018099	M00000000000100001010001	4	0
0	0	0	0	0	0	0	0	0	0	0	1	0	0	0	0	1	0	1	0	0	0	1	0	0	0	0	0	0	0	0	0	0	0	-7.9	0	0	0	0	-2.5	0	-9.3	0	0	0	-5	C0003868	M00000000000100001010001	4	0
0	0	1	0	0	0	0	0	0	0	0	0	0	0	0	0	0	0	0	0	0	0	1	0	0	-9.1	0	0	0	0	0	0	0	0	0	0	0	0	0	0	0	0	0	0	0	-2.6	C0200695	M00100000000000000000001	2	0
0	0	0	0	0	0	1	0	0	0	0	0	0	0	0	1	0	0	0	0	0	0	1	0	0	0	0	0	0	-8.7	0	0	0	0	0	0	0	0	-3.1	0	0	0	0	0	0	-2.3	C0032897	M00000010000000010000001	3	0
0	0	0	0	0	0	0	0	1	0	0	0	0	0	0	0	0	0	0	0	0	0	1	0	0	0	0	0	0	0	0	-8.5	0	0	0	0	0	0	0	0	0	0	0	0	0	-2.1	C0795864	M00000000100000000000001	2	0
1	0	0	0	0	0	0	0	1	0	0	0	0	0	0	0	0	0	1	0	0	0	1	-7.9	0	0	0	0	0	0	0	-2.6	0	0	0	0	0	0	0	0	0	-3.4	0	0	0	-5.4	C0409974	M10000000100000000010001	4	0
0	0	0	1	0	0	0	0	1	0	0	1	0	0	0	1	1	0	0	1	0	1	1	0	0	0	-2.2	0	0	0	0	-2.6	0	0	-7.8	0	0	0	-2.5	-2.2	0	0	-3.8	0	-4.4	-4.5	C0015672	M00010000100100011001011	8	0
0	0	1	0	0	0	1	0	0	0	0	0	0	0	0	0	0	0	1	0	0	0	1	0	0	-4	0	0	0	-2.8	0	0	0	0	0	0	0	0	0	0	0	-7.7	0	0	0	-6.3	C0202239	M00100010000000000010001	4	0
1	0	0	0	0	0	0	0	1	0	0	0	0	0	0	0	0	0	1	0	0	0	1	-7.7	0	0	0	0	0	0	0	-2.4	0	0	0	0	0	0	0	0	0	-3.9	0	0	0	-4.6	C0024131	M10000000100000000010001	4	0
1	0	0	0	0	0	0	0	1	0	0	0	0	0	0	0	0	0	1	0	0	0	1	-7.3	0	0	0	0	0	0	0	-2.6	0	0	0	0	0	0	0	0	0	-3.8	0	0	0	-4.7	C0024138	M10000000100000000010001	4	0
0	0	1	0	0	0	0	0	0	0	0	1	0	0	0	1	1	1	0	0	0	0	1	0	0	-3.2	0	0	0	0	0	0	0	0	-3	0	0	0	-5.5	-7.3	-2	0	0	0	0	-4.2	C0019348	M00100000000100011100001	6	0
0	0	1	0	0	0	0	0	0	0	1	1	0	0	0	0	1	0	0	0	0	0	1	0	0	-4.4	0	0	0	0	0	0	0	-6.8	-7.2	0	0	0	0	-2	0	0	0	0	0	-4.8	C1445957	M00100000001100001000001	5	0
0	0	0	0	0	0	0	0	0	0	0	0	0	0	0	0	0	1	0	0	0	1	1	0	0	0	0	0	0	0	0	0	0	0	0	0	0	0	0	0	-7.1	0	0	0	-4.6	-4.4	C2239219	M00000000000000000100011	3	0
1	0	1	1	0	0	1	0	0	0	1	1	0	0	0	0	0	0	0	0	0	0	1	-3.4	0	-6.6	-3.5	0	0	-4.5	0	0	0	-4.1	-5.5	0	0	0	0	0	0	0	0	0	0	-5.5	C0202236	M10110010001100000000001	7	0
0	0	0	0	0	1	1	1	0	0	0	1	0	1	0	0	0	0	1	1	0	1	1	0	0	0	0	0	-2.7	-3.7	-2.4	0	0	0	-3.7	0	-2.2	0	0	0	0	-6.6	-3.1	0	-2.2	-3.9	C0014772	M00000111000101000011011	9	0
1	0	0	1	0	0	0	0	0	0	0	0	0	0	0	0	1	0	1	0	0	0	1	-6.5	0	0	-3	0	0	0	0	0	0	0	0	0	0	0	0	-3.4	0	-2.4	0	0	0	-4.4	C1527336	M10010000000000001010001	5	0
0	0	0	1	0	0	0	0	1	0	0	0	0	0	0	1	1	0	0	0	0	0	1	0	0	0	-6.5	0	0	0	0	-2.9	0	0	0	0	0	0	-2.3	-4	0	0	0	0	0	-3	C0011311	M00010000100000011000001	5	0
0	1	0	0	0	0	1	0	1	0	0	1	0	0	0	0	1	0	0	0	0	0	1	0	-6.4	0	0	0	0	-2.3	0	-3.9	0	0	-4.4	0	0	0	0	-3	0	0	0	0	0	-5.1	C0035334	M01000010100100001000001	6	0
0	1	0	0	0	0	0	0	1	0	0	1	1	0	0	0	0	1	1	0	0	0	1	0	-2.8	0	0	0	0	0	0	-2.4	0	0	-2	-2.1	0	0	0	0	-6.4	-3.2	0	0	0	-4.4	C0038013	M01000000100110000110001	7	0
0	1	0	0	0	0	1	0	0	0	0	0	0	0	1	1	0	0	0	0	1	0	1	0	-2.1	0	0	0	0	-3.1	0	0	0	0	0	0	0	-6.2	-2.7	0	0	0	0	-2.3	0	-4.3	C0018818	M01000010000000110000101	6	0
[truncated: 17 more columns]

## Sheet: Supplementary Table6
Supplementary Table 6. The Functional enrichment analysis at the chromosome level.
Chromosome(hg38)	GroupID	Category	Term	Description	LogP	Log(q-value)	Genes	Symbols	InTerm_InList
chr5	1_Summary	GO Biological Processes	GO:0007156	homophilic cell adhesion via plasma membrane adhesion molecules	-90.2372	-85.89	5.09886e+266	PCDHGC3,PCDHGB4,PCDHGA8,PCDHA9,PCDHGA12,PCDHB5,PCDHB1,PCDHGC5,PCDHGC4,PCDHGB7,PCDHGB6,PCDHGB5,PCDHGB3,PCDHGB2,PCDHGB1,PCDHGA11,PCDHGA10,PCDHGA9,PCDHGA7,PCDHGA6,PCDHGA5,PCDHGA4,PCDHGA3,PCDHGA2,PCDHGA1,PCDHB15,PCDHB14,PCDHB13,PCDHB12,PCDHB11,PCDHB10,PCDHB9,PCDHB8,PCDHB7,PCDHB6,PCDHB4,PCDHB3,PCDHB2,PCDHAC2,PCDHAC1,PCDHA13,PCDHA12,PCDHA11,PCDHA10,PCDHA8,PCDHA7,PCDHA6,PCDHA5,PCDHA4,PCDHA3,PCDHA2,PCDHA…	54/-
chr19	1_Summary	KEGG Pathway	hsa05168	Herpes simplex virus 1 infection	-55.5394	-51.191	#NUM!	C3,ZNF28,ZNF91,ZNF254,ZFP30,ZNF571,ZNF331,ZNF701,ZNF83,ZFP14,ZNF529,ZNF557,ZNF665,ZNF611,ZNF528,ZNF527,ZNF347,ZNF607,ZNF382,ZNF566,ZNF468,ZNF765,ZNF845,ZNF461,ZNF585B,ZNF813,ZNF573,ZNF534,ZNF578,ZNF420,ZNF565,ZNF681,ZNF569,ZNF570,ZNF600,ZNF320,ZNF567,ZNF383,ZNF540,ZNF525,ZNF675,ZNF585A,ZFP82,ZNF875,ZNF850,ZNF677,ZNF829,ZNF568,ZNF728,ZNF790,ZNF808,ZNF761,ZNF793,ZNF724,ZNF726,ZNF730,LOC122539214	57/-
chr2	1_Summary	WikiPathways	WP5221	2q11.2 copy number variation syndrome	-43.0979	-38.749	1.51184e+121	ADRA2B,DUSP2,CIAO1,ARID5A,SNRNP200,NCAPH,CNNM4,CNNM3,ANKRD39,FAM178B,SEMA4C,TMEM127,KANSL3,STARD7,ANKRD36B,LMAN2L,FER1L5,NEURL3,GPAT2,ITPRIPL1,FAHD2B,ANKRD23,ANKRD36,ASTL	24/-
chr7	1_Summary	WikiPathways	WP4932	7q11.23 copy number variation syndrome	-36.9855	-32.638	1.36414e+105	CLDN4,CLDN3,ELN,GTF2I,LIMK1,STX1A,EIF4H,CLIP2,LAT2,FZD9,FKBP6,BAZ1B,BCL7B,GTF2IRD1,TBL2,MLXIPL,ABHD11,DNAJC30,BUD23,TMEM270,TRIM50,METTL27,VPS37D	23/-
chr14	1_Summary	GO Biological Processes	GO:0009593	detection of chemical stimulus	-25.2353	-20.888	7.04379e+113	TGFB3,OR4K5,OR11H2,OR4K1,OR4K15,OR4K14,OR4L1,OR11H6,OR4K3,OR4N2,OR4K2,OR4Q2,OR4K13,OR4K17,OR4N5,OR11G2,OR11H7,OR11H4,OR4Q3,OR4M1	20/-
chr14	2_Summary	GO Biological Processes	GO:0050911	detection of chemical stimulus involved in sensory perception of smell	-24.8087	-20.785	7.93178e+109	OR4K5,OR11H2,OR4K1,OR4K15,OR4K14,OR4L1,OR11H6,OR4K3,OR4N2,OR4K2,OR4Q2,OR4K13,OR4K17,OR4N5,OR11G2,OR11H7,OR11H4,OR4Q3,OR4M1	19/-
chr15	1_Summary	WikiPathways	WP4942	15q13.3 copy number variation syndrome	-23.7729	-19.425	1.13943e+60	CHRNA7,TRPM1,KLF13,MTMR10,CHRFAM7A,ARHGAP11B,OTUD7A,GOLGA8Q,GOLGA8O,GOLGA8H,GOLGA8R	11/-
chr6	1_Summary	KEGG Pathway	hsa04612	Antigen processing and presentation	-23.0642	-18.716	3.10531e+225	HLA-A,HLA-B,HLA-C,HLA-DOB,HLA-DQA1,HLA-DQA2,HLA-DQB1,HLA-DRA,HLA-DRB1,HLA-DRB5,HLA-F,HLA-G,HSPA1A,HSPA1B,HSPA1L,TAP1,TAP2,TNF,HLA-DQB2,MICB,PSMB8,RAB32,MICA,LTA,C2,C4A,C4B,CDKN1A,MAPK14,MAPK13,CCR6,ATP6V1G2,RAB44,ATF6B,CFB,PRKN,PSMB9,BTNL2,FBXO30,RNF182,NCR3,LTB,SRSF3,SRPK1,ZFP57,AIF1,FOXO3,CD83,RPS6KA2,CDSN,NOTCH4,LST1,UTRN,PPARD	54/-
chr8	1_Summary	Reactome Gene Sets	R-HSA-1461973	Defensins	-21.6929	-17.345	1.66717e+81	DEFA1,DEFA3,DEFA4,DEFA5,DEFA6,DEFB1,DEFB130A,DEFB135,DEFB136,DEFB134,DEFA1B,DEFB130B,CTSB,SLC30A8,WWP1,CPNE3	16/-
chr5	2_Summary	GO Biological Processes	GO:0016339	calcium-dependent cell-cell adhesion via plasma membrane cell adhesion molecules	-20.4524	-16.707	5.09886e+99	PCDHGC3,PCDHGB4,PCDHB5,PCDHB14,PCDHB13,PCDHB11,PCDHB10,PCDHB9,PCDHB6,PCDHB4,PCDHB3,PCDHB2,PCDHB16,HOMER1,PCDHGC5,PCDHGC4,CARTPT,SLC12A7,FCHSD1,OCLN	20/-
chr19	2_Summary	Reactome Gene Sets	R-HSA-198933	Immunoregulatory interactions between a Lymphoid and a non-Lymphoid cell	-20.2124	-16.165	7.1838e+109	C3,KIR2DL1,KIR2DL3,KIR2DL4,KIR3DL1,KIR3DL2,LAIR1,LAIR2,NCR1,LILRB2,LILRB1,LILRB5,LILRB4,LILRA1,LILRB3,LILRA2,LILRA4,OSCAR,LILRA5,PSMD8,VAV1,ADGRE1,LILRA6,TARM1	24/-
chr7	2_Summary	GO Biological Processes	GO:0045737	positive regulation of cyclin-dependent protein serine/threonine kinase activity	-19.1	-15.053	4.42572e+98	SPDYE21,SPDYE5,SPDYE14,SPDYE10,SPDYE8,SPDYE12,SPDYE18,SPDYE11,SPDYE16,SPDYE17,SPDYE15,NCAPG2,NCF1,CLDN3	14/-
chr17	1_Summary	WikiPathways	WP5287	17q12 copy number variation syndrome	-18.8976	-14.55	6.34863e+102	CCL3,CCL3L1,CCL4,CCL18,ZNHIT3,CCL4L2,DHRS11,GGNBP2,MRM1,MYO19,PIGW,TBC1D3B,TBC1D3H,TBC1D3G,TBC1D3I,ABR,CRK,TBC1D3F,TBC1D16,SMCR8	20/-
chr6	2_Summary	GO Biological Processes	GO:0002483	antigen processing and presentation of endogenous peptide antigen	-17.8885	-14.443	3.10531e+183	HLA-A,HLA-B,HLA-C,HLA-DRA,HLA-DRB1,HLA-F,HLA-G,MICB,TAP1,TAP2,MICA,NCR3,LTA,TNF,PSMB8,PSMB9,CDKN1A,ATF6B,MAPK14,MAPK13,FOXO3,AIF1,GPR31,NFKBIL1,PPARD,ILRUN,HSPA1A,HSPA1B,PRKN,FBXO30,RNF182,C4B,HSPA1L,SNX3,ATP6V1G2,NOTCH4,TNXB,HLA-DOB,LST1,RPL10A,RPS10,SRPK1,TAF11,NELFE	44/-
chr1	1_Summary	KEGG Pathway	hsa05322	Systemic lupus erythematosus	-15.0714	-10.723	2.20922e+253	FCGR1A,FCGR2A,FCGR3A,FCGR3B,H3-4,H2AC18,H2AC20,H2BC21,H4C14,H2AC25,H3C14,H2BC26,H2AC21,H3C15,H2BC18,H4C15,H3C13,H2AC19,AKT3,GNAI3,GNB1,CALML6,VPS72,PSMA5,PSMB4,PSMD4,NOTCH2,APH1A,HES5,SYCP1,ADAM30,PRKCZ,UHMK1,PRDX1,WNT3A,TDRKH,HENMT1,ENSA,GNAT2,SETDB1,CTSK,SDCCAG8,NASP,ARNT,HSPA6,TXNIP,ATF6,COX20,ARF1,TAF13,VPS45,POGZ,PIAS3,FAAP20	54/-
chr20	1_Summary	Reactome Gene Sets	R-HSA-1461957	Beta defensins	-14.3266	-9.979	1.17285e+45	DEFB118,DEFB115,DEFB116,DEFB119,DEFB121,DEFB123,DEFB124,HCK	8/-
chr15	2_Summary	GO Biological Processes	GO:0007030	Golgi organization	-12.3473	-8.301	2.83769e+62	GOLGA8G,GOLGA8N,GOLGA8J,GOLGA8T,GOLGA8K,GOLGA8M,GOLGA8Q,GOLGA8O,GOLGA8H,GOLGA8R	10/-
chr6	3_Summary	GO Biological Processes	GO:0050778	positive regulation of immune response	-12.1263	-9.311	6.29718e+99	CFB,C2,C4A,C4B,GPR31,HLA-A,HLA-B,HLA-C,HLA-DQB1,HLA-DRA,HLA-DRB1,HLA-F,HLA-G,HSPA1A,HSPA1B,LTA,MICB,MOG,TAP2,TNF,BAG6,BTNL2,NCR3,MICA	24/-
chr22	1_Summary	WikiPathways	WP4657	22q11.2 copy number variation syndrome	-11.8274	-7.479	1.39953e+46	CRKL,PI4KA,SLC7A4,LZTR1,P2RX6,SNAP29,THAP7,TUBA3FP,AIFM3,LRRC74B	10/-
chr16	1_Summary	WikiPathways	WP4950	16p11.2 distal deletion syndrome	-11.7419	-7.394	4.87931e+39	ATP2A1,CD19,TUFM,ATXN2L,SH2B1,LAT,RABEP2,SPNS1,NFATC2IP	9/-
chr19	3_Summary	KEGG Pathway	hsa04662	B cell receptor signaling pathway	-11.5075	-7.636	7.4091e+157	VAV1,LILRB2,LILRB1,LILRB5,LILRB4,LILRA1,LILRB3,LILRA2,LILRA4,LILRA6,LILRA5,OSCAR,KIR2DL1,ZNF675,STK11,CNN2,KIR2DL4,GPR108,TARM1,ACTN4,AZU1,SBNO2,NLRP7,ELANE,INSR,TRIP10,ABCA7,EHD2,CABP5,GRIN3B,SPINT2,CARD8,GP6	33/-
chr11	1_Summary	GO Biological Processes	GO:0007608	sensory perception of smell	-10.9217	-6.574	5.82793e+135	BBS1,OR51B4,OR51B2,OR52P1,OR51B5,OR4C13,OR4C12,OR52B6,OR56B1,OR51B6,OR51M1,OR51Q1,OR51I1,OR51I2,OR52D1,OR52H1,OR52N4,OR56B2P,OR4A47,OR4C45,PITPNM1,ANO1,CABP4,GRK2,CABP2	25/-
chr8	2_Summary	Reactome Gene Sets	R-HSA-1461957	Beta defensins	-9.6769	-6.56	1.67225e+50	DEFB1,DEFB130A,DEFB135,DEFB136,DEFB134,DEFB130B,DEFA1,NRG1,DEFA1B	9/-
chr1	2_Summary	GO Biological Processes	GO:0018916	nitrobenzene metabolic process	-8.11841	-5.288	2.94429e+99	GSTM1,GSTM2,GSTM3,GSTM4,GSTM5,AKR1A1,MMACHC,PRKCZ,AKT3,CALML6,ARNT,GNAI3,NOTCH2,SDHC,GNB1,PTGER3,WNT3A,HES5,PRDX1,PDZK1,GUK1,RORC,GJC2	23/-
chr19	4_Summary	GO Biological Processes	GO:0006346	DNA methylation-dependent heterochromatin formation	-7.86844	-4.298	1.25997e+29	MBD3L2,MBD3L5,MBD3L4,MBD3L3,MBD3L2B	5/-
chr1	3_Summary	Reactome Gene Sets	R-HSA-189085	Digestion of dietary carbohydrate	-7.5073	-4.802	2.76277e+25	AMY1A,AMY1B,AMY1C,AMY2A,AMY2B,AKT3,CALML6	7/-
chr2	2_Summary	WikiPathways	WP5223	2q21.1 copy number variation syndrome	-7.09047	-3.043	5.50419e+27	PLEKHB2,CCDC74A,TUBA3D,POTEE,MZT2A	5/-
chr6	4_Summary	Reactome Gene Sets	R-HSA-174577	Activation of C3 and C5	-7.04064	-4.665	6.29718e+126	CFB,C2,C4A,C4B,CCR6,HLA-A,HLA-DQB1,HLA-DRB1,LTA,TNF,CD83,MAPK14,RPL10A,MAPK13,RPS10,RPS10-NUDT3,CDKN1A,FOXO3,TULP1,SNX3,PRKN,PACSIN1,AIF1,HLA-B,HLA-C,SRPK1,RNASET2,ILRUN,MICA,HLA-F	30/-
chr13	1_Summary	Reactome Gene Sets	R-HSA-159763	Transport of gamma-carboxylated protein precursors from the endoplasmic reticulum to the Golgi apparatus	-6.68202	-2.72	2.15522e+42	F7,F10,PROZ,DGKH,AKAP11,PDX1,TNFSF11,C1QTNF9,C1QTNF9B	9/-
chr1	4_Summary	GO Biological Processes	GO:0000413	protein peptidyl-prolyl isomerization	-6.58899	-4.067	6.44592e+93	PPIAL4G,PPIAL4A,PPIAL4C,PPIAL4F,PPIAL4E,PPIAL4H,HSPA6,ATF6,ANP32E,CTH,DDR2,PRKCZ,VPS72,SETDB1,AKT3,PIAS3,MAST2,UHMK1	18/-
chr19	5_Summary	KEGG Pathway	hsa04612	Antigen processing and presentation	-6.36111	-3.013	3.80238e+37	KIR2DL1,KIR2DL3,KIR2DL4,KIR2DS4,KIR3DL1,KIR3DL2,KIR3DL3,VAV1,NCR1	9/-
chr6	5_Summary	KEGG Pathway	hsa03040	Spliceosome	-6.28474	-3.982	3.30333e+95	HSPA1A,HSPA1B,HSPA1L,SRSF3,SNRPC,DDX39B,PPIL1,LSM2,SF3B5,MAPK14,RPL10A,PSMB8,PSMB9,RPS10,SKIC2,LTV1,ADAT2,DXO,SRPK1,TAF11,QKI,RAMACL	22/-
chr15	3_Summary	WikiPathways	WP4940	15q11.2 copy number variation syndrome	-6.14441	-2.399	2.31918e+19	CYFIP1,NIPA2,NIPA1,HERC2	4/-
chr16	2_Summary	GO Biological Processes	GO:0006068	ethanol catabolic process	-5.86657	-1.82	6.79968e+135	SULT1A2,SULT1A1,SULT1A3,SULT1A4,ABAT,ABCC6,CDH1,CDH3,NQO1,HSD11B2,MMP2,ABCC1,SLC6A2,BCO1,CES1,LCAT,APOBR,SDR42E2,ST3GAL2,XYLT1,DPEP2,BOLA2,BOLA2B,PARN,ATP6V0D1,EXOSC6,GCSH,PLA2G15,GPT2,DPEP3	30/-
chr6	6_Summary	GO Biological Processes	GO:0009617	response to bacterium	-5.80098	-3.535	7.17721e+70	C2,C4B,CLPS,MAPK14,FKBP5,FUCA2,GPR31,HLA-A,HLA-B,HLA-DRB1,LTA,NFKBIL1,PPARD,TAP2,TNF,SNX3,MICA	17/-
chr1	5_Summary	GO Biological Processes	GO:0007420	brain development	-5.74087	-3.256	1.95222e+142	CELSR2,FCGR2B,GNAI3,HMGCS2,HSD3B1,HSD3B2,SKI,STXBP3,AKT3,TSPAN2,WDR47,PHGDH,GJC2,AMIGO1,WNT3A,NEGR1,ASPM,SYPL2,HES5,NOTCH2NLA,SRGAP2C,NOTCH2NLC,NOTCH2NLB,NOTCH2,APH1A,CSF1,CRB1,VPS72	28/-
chr21	1_Summary	Canonical Pathways	M5887	NABA BASEMENT MEMBRANES	-5.48902	-1.492	1.29113e+16	COL6A1,COL6A2,COL18A1,S100B	4/-
chr1	6_Summary	KEGG Pathway	hsa04380	Osteoclast differentiation	-5.44413	-2.982	1.43515e+93	CSF1,CTSK,FCGR1A,FCGR2A,FCGR2B,FCGR3A,FCGR3B,FCGR2C,AKT3,CTSS,RFX5,CALML6,PIP5K1A,SEC22B,GNAI3,GNB1,TXNIP,NOTCH2,ARF1,CD160,SH2D1B,PSMB4	22/-
chr17	2_Summary	GO Biological Processes	GO:0048245	eosinophil chemotaxis	-5.43969	-2.028	6.34863e+81	CCL3,CCL3L1,CCL4,CCL18,ACTG1,MYO1C,CRK,GRB2,CCL4L2,MAP2K3,NUP85,CARD14,SLC47A1,NXN,SLC47A2,MAPK7,EIF4A3,SAP30BP,GRAP	19/-
chr17	3_Summary	Reactome Gene Sets	R-HSA-9664407	Parasite infection	-5.366	-2.028	7.11398e+86	ACTG1,CRK,GRB2,MYO1C,BAIAP2,GGA3,YWHAE,ITGB4,MAPK7,MAP2K3,FLII,RPTOR,NPTX1,TBCD,CHMP6,GRAP,NLK,ABR,ALDH3A2,NUP85,MYO19	21/-
chr19	6_Summary	GO Biological Processes	GO:0032651	regulation of interleukin-1 beta production	-5.29774	-2.095	5.6611e+55	AZU1,LILRB4,LILRA2,CARD8,NLRP2,NLRP7,LILRA5,C3,ELANE,KIR2DL4,LILRB2,LILRB1	12/-
chr12	1_Summary	Reactome Gene Sets	R-HSA-139853	Elevation of cytosolic Ca2+ levels	-5.16801	-1.065	5.0255e+111	P2RX4,P2RX7,ORAI1,PTPN11,DNM1L,ERP29,RPH3A,LRRK2,SYT10,CAMKK2,RILPL1,DDX11,CPNE8,DENND5B,SPPL3,PKP2,MYL2,CUX2,SH2B3,KIF21A,BICD1,ATXN2,C12orf43	23/-
chr19	7_Summary	Reactome Gene Sets	R-HSA-6798695	Neutrophil degranulation	-5.16435	-1.992	5.66718e+83	AZU1,C3,CNN2,CFD,ELANE,FCAR,LAIR1,PRTN3,LILRB2,LILRB3,ARHGAP45,OSCAR,TARM1,KIR3DL1,VAV1,LILRB1,LILRA2,SBNO2,LGALS4	19/-
chr4	1_Summary	GO Biological Processes	GO:0048738	cardiac muscle tissue development	-5.05619	-1.119	1.90935e+72	EDNRA,RBPJ,MSX1,SGCB,PDLIM5,EVC,WDR1,CYTL1,OTOP1,BMPR1B,MAB21L2,UNC5C,ANAPC4,FSTL5,SLC34A2,PSAPL1	16/-
chr6	7_Summary	GO Biological Processes	GO:0045591	positive regulation of regulatory T cell differentiation	-4.96959	-2.758	2.30931e+55	FOXO3,HLA-DRA,HLA-DRB1,HLA-G,HLA-DRB5,CFB,CCR6,TNF,APOM,CD83,HLA-A,HLA-B,LTA,NR2E1	14/-
chr6	8_Summary	GO Biological Processes	GO:0001819	positive regulation of cytokine production	-4.9104	-2.705	1.99143e+64	AIF1,MAPK14,HLA-A,HLA-F,HLA-G,HSPA1A,HSPA1B,LTA,LTB,MAPK13,TNF,TNXB,CD83,NCR3,HLA-DRB1,CCR6	16/-
chr17	4_Summary	GO Biological Processes	GO:0030036	actin cytoskeleton organization	-4.89891	-1.722	7.11398e+58	ACTG1,CRK,FLII,GRB2,LLGL2,LLGL1,MYO1C,BAIAP2,FSCN2,MYO19,SPECC1,YWHAE,MYO15B,MFAP4	14/-
chrX	1_Summary	KEGG Pathway	hsa04630	JAK-STAT signaling pathway	-4.87571	-0.528	1438356364109	CSF2RA,IL3RA,CRLF2	3/-
chr16	3_Summary	GO Biological Processes	GO:0071716	leukotriene transport	-4.86826	-1.304	3.68436e+50	ABCC6,ABCC1,ABCC11,CLN3,SLC5A2,PLA2G10,SPNS1,ABCC12,CES1,LCAT,APOBR,PSMB10	12/-
chr17	5_Summary	CORUM	CORUM:115	Polycomb repressive complex 1 (PRC1, hPRC-H)	-4.85204	-1.722	8.53557e+44	CBX4,CBX8,CBX2,NUP85,RPTOR,MAPK7,MAP2K3,GRB2,YWHAE,NPLOC4	10/-
chr7	3_Summary	KEGG Pathway	hsa05168	Herpes simplex virus 1 infection	-4.8118	-1.72	1.07935e+50	ZNF273,ZNF107,ZNF479,ZNF92,ZNF679,ZNF716,ZNF727,ZNF736,ZNF735	9/-
chr18	1_Summary	WikiPathways	WP366	TGF-beta signaling pathway	-4.78668	-0.621	4.08941e+46	SMAD4,SMAD7,MAPK4,ROCK1,GATA6,GREB1L,MIB1,YES1,CDH2,ACAA2,DCC	11/-
chr6	9_Summary	WikiPathways	WP5098	T-cell activation SARS-CoV-2	-4.77609	-2.577	1.02623e+59	CDKN1A,FOXO3,HLA-DRA,HLA-DRB1,LTA,TNF,MAPK14,RAB44,PRKN,SESN1,APOM,HLA-A,GABBR1,PPARD	14/-
chr11	2_Summary	GO Biological Processes	GO:0015884	folic acid transport	-4.70717	-1.439	2.34824e+63	FOLR1,FOLR2,FOLR3,RELA,CCND1,TPCN2,SHANK2,RBM4,GAL,CPT1A,SIPA1,FOSL1,KAT5,BBS1,CCDC87	15/-
chr6	10_Summary	KEGG Pathway	hsa04915	Estrogen signaling pathway	-4.64212	-2.446	1.38823e+151	ATF6B,FKBP5,GABBR1,GRM1,HSPA1A,HSPA1B,HSPA1L,PRKN,BAG6,PACRG,MAPK14,CSNK2B,MAPK13,TNF,MAP3K4,RPS6KA2,FOXO3,BAG2,PPIL1,DXO,EPM2A,SESN1,MICB,MICA,MOG,TAF11,DDX39B,CDKN1A,PPARD,PI16,SNX3,AIF1,NR2E1,CEP43,STK38	35/-
chr6	11_Summary	WikiPathways	WP5092	Interactions of natural killer cells in pancreatic cancer	-4.61588	-2.423	4.27771e+55	MICB,TNF,NCR3,MICA,AIF1,CLIC1,CCR6,MAPK14,HLA-A,BAG6,CD83,RAB44	12/-
chr6	12_Summary	Reactome Gene Sets	R-HSA-2262752	Cellular responses to stress	-4.55066	-2.372	5.34103e+97	ATP6V1G2,CDKN1A,MAPK14,CSNK2B,FKBP5,HSPA1A,HSPA1B,HSPA1L,RPL10A,PSMB8,PSMB9,RPS6KA2,RPS10,BAG2,EHMT2,SESN1,FOXO3,TEAD3,MAPK13,UTRN,ADGRG6,NOTCH4,NR2E1,PRIM2	24/-
chr16	4_Summary	GO Biological Processes	GO:0160063	multi-pass transmembrane protein insertion into ER membrane	-4.49279	-1.187	2.34203e+82	NOMO1,NOMO2,NOMO3,EMC8,CDH1,CLN3,ITGAL,ATP2C2,ZDHHC1,VPS35,NETO2,NUTF2,CTCF,ACD,RIPOR1,LONP2,SGF29	17/-
chr16	5_Summary	Canonical Pathways	M47	PID INTEGRIN CS PATHWAY	-4.42175	-1.153	3.68137e+61	ITGAD,ITGAL,ITGAM,ITGAX,CDH1,CDH3,LAT,MYH11,MYL11,MYLK3,CORO1A,OTOA,MMP2,CAPNS2	14/-
chr6	13_Summary	GO Biological Processes	GO:0045639	positive regulation of myeloid cell differentiation	-4.34046	-2.177	1.43223e+88	MAPK14,FOXO3,HLA-DRB1,HSPA1A,HSPA1B,TNF,HLA-B,HLA-DRA,HLA-G,CD83,BRPF3,POU5F1,PPARD,TEAD3,CLIC1,RPL10A,NOTCH4,SRPK1,TNXB,QKI,TBXT,MSH5	22/-
chr13	2_Summary	GO Biological Processes	GO:1900087	positive regulation of G1/S transition of mitotic cell cycle	-4.25508	-0.815	8.45129e+18	CUL4A,RGCC,CENPJ,PCID2	4/-
chr2	3_Summary	Reactome Gene Sets	R-HSA-2129379	Molecules associated with elastic fibres	-4.23944	-0.368	3.68537e+17	ITGAV,ITGB6,EMILIN1,BMP10	4/-
chr17	6_Summary	WikiPathways	WP185	Integrin-mediated cell adhesion	-4.20544	-1.289	1.39829e+77	CRK,GRB2,ITGB4,MAPK7,MAP2K3,MYO1C,EIF4A3,BAIAP2,NLK,FAM83G,ACTG1,CCL4,ULK2,RPTOR,CCL3,YWHAE,NDUFAF8,RNF213	18/-
chr6	14_Summary	GO Biological Processes	GO:0009991	response to extracellular stimulus	-4.20482	-2.055	1.99103e+56	AIF1,CDKN1A,CLPS,MAPK14,FOXO3,LTA,PPARD,TNF,EHMT2,SESN1,CLPSL1,CLPSL2,ATF6B	13/-
chr6	15_Summary	WikiPathways	WP4877	Host-pathogen interaction of human coronaviruses - MAPK signaling	-4.17346	-2.032	1.43242e+68	MAPK14,MAP3K4,MAPK13,RPS6KA2,CDKN1A,TNF,ATF6B,LTA,NFKBIL1,FOXO3,GRM1,NOTCH4,OSTM1,SRPK1,STK38,ATP6V1G2,PRKN	17/-
chr3	1_Summary	Reactome Gene Sets	R-HSA-448424	Interleukin-17 signaling	-4.15235	-0.28	1.84937e+68	DUSP7,IRAK2,IL17RC,IL17RE,RPN1,SEC13,VHL,CRBN,TLR9,IL5RA,ITIH4,MGLL,STAB1,RFTN1,JAGN1	15/-
chr3	2_Summary	GO Biological Processes	GO:0030851	granulocyte differentiation	-4.12168	-0.28	2624831484522	GATA2,BAP1,JAGN1	3/-
chr12	2_Summary	GO Biological Processes	GO:0060999	positive regulation of dendritic spine development	-4.11419	-0.612	8.55023e+29	MAPKAPK5,CUX2,CAPRIN2,LRRK2,DDX11,SPPL3	6/-
chr22	2_Summary	Reactome Gene Sets	R-HSA-9013404	RAC2 GTPase cycle	-4.09163	-0.044	4.68959e+27	NCF4,RAC2,CDC42EP1,SAMM50,KCTD17,ARFGAP3	6/-
chr19	8_Summary	GO Biological Processes	GO:0031347	regulation of defense response	-4.06896	-1.043	7.18199e+88	C3,ELANE,GPX4,KIR2DL4,VAV1,NCR1,LILRB1,LILRA2,SBNO2,LILRA4,NOP53,NLRP2,GPR108,NLRP7,LILRA5,KIR3DL2,LILRB2,LILRB4,CARD8	19/-
chr17	7_Summary	GO Biological Processes	GO:0051668	localization within membrane	-4.03379	-1.161	1.3984e+74	CRK,LLGL1,MYO1C,NPTX1,NSF,RAB40B,GGA3,TIMM22,PIGW,TRARG1,YWHAE,CEP131,NPLOC4,NUP85,ARL17B	15/-
chr1	7_Summary	WikiPathways	WP496	Steroid biosynthesis	-4.02857	-1.705	2.16533e+17	F13B,HSD3B1,HSD3B2,CALML6	4/-
chr3	3_Summary	GO Biological Processes	GO:0051960	regulation of nervous system development	-4.02713	-0.28	2.6245e+71	GATA2,OXTR,PLXNA1,MAP3K13,TWF2,GHRL,SEMA3G,LRRN1,CAV3,TNNC1,ATP2B2,MGLL,TMEM108,SENP2,CRELD1,ARL13B	16/-
chr3	4_Summary	GO Biological Processes	GO:0030212	hyaluronan metabolic process	-4.02695	-0.28	3.69737e+20	ITIH1,ITIH3,ITIH4,PROS1,MGLL	5/-
chr2	4_Summary	GO Biological Processes	GO:0033365	protein localization to organelle	-4.02362	-0.29	6.17106e+69	BCS1L,CENPA,PPP3R1,SSB,TIA1,MAPRE3,INSIG2,NEURL3,NUP35,ZFAND2B,APLF,RGPD1,FSIP2,RGPD6	14/-
chr16	6_Summary	GO Biological Processes	GO:0033238	regulation of amine metabolic process	-4.00202	-0.885	1.81201e+27	ABAT,CLN3,ITGAM,VPS35,CDH1,PARD6A,RIPOR1	7/-
chr11	3_Summary	GO Biological Processes	GO:0045087	innate immune response	-3.98417	-0.783	5.97088e+154	RELA,FADD,TRIM22,RBM14,KAT5,IPO7,TRIM34,UNC93B1,TRIM5,TRIM6,TRIM51G,DEFB108B,TRIM49B,TRIM64C,DEFB131B,CFL1,FOSL1,BANF1,TMEM9B,GSTP1,LRP5,CTTN,TPCN2,SNX32,CCND1,INPPL1,AIP,IL18BP,CLCF1,PELI3,BRMS1	31/-
chr13	3_Summary	GO Biological Processes	GO:0031100	animal organ regeneration	-3.96974	-0.753	2.15523e+25	F7,FLT3,PDX1,CUL4A,TNFSF11,LNX2	6/-
chr6	16_Summary	GO Biological Processes	GO:0009611	response to wounding	-3.95826	-1.832	1.99667e+44	AIF1,DST,CDKN1A,CLIC1,MAPK14,NOTCH4,POU5F1,PPARD,TNF,MPIG6B,C6orf89	11/-
chr4	2_Summary	GO Biological Processes	GO:0055001	muscle cell development	-3.95086	-0.517	1.90964e+22	EDNRA,SGCB,WDR1,PDLIM5,OTOP1	5/-
chr4	3_Summary	GO Biological Processes	GO:0051216	cartilage development	-3.91125	-0.517	6.58212e+19	BMPR1B,EVC,MSX1,CYTL1,EDNRA	5/-
chr1	8_Summary	Reactome Gene Sets	R-HSA-9013694	Signaling by NOTCH4	-3.90225	-1.603	4.85357e+26	NOTCH2,PSMA5,PSMB4,PSMD4,APH1A,HES5	6/-
chr12	3_Summary	GO Biological Processes	GO:0000165	MAPK cascade	-3.84063	-0.535	5.02783e+50	P2RX7,BRAP,MAPKAPK5,CAMKK2,LRRK2,SH2B3,ERP29,PTPN11,CDK2AP1,CAPRIN2,DNM1L	11/-
chr11	4_Summary	GO Biological Processes	GO:0051412	response to corticosterone	-3.81496	-0.672	5.95806e+28	CCND1,FOSL1,NPAS4,FGF4,LRP5,GRK2,SCUBE2	7/-
chr6	17_Summary	GO Biological Processes	GO:0007281	germ cell development	-3.81355	-1.701	1.23562e+56	CCR6,RPS6KA2,SRPK1,TCP11,QKI,EHMT2,ARMC2,PACRG,ARMC12,BAG6,ADGB,SLC26A8	12/-
chr22	3_Summary	GO Biological Processes	GO:0008610	lipid biosynthetic process	-3.80954	0	7.06157e+39	TSPO,CYP2D6,CYB5R3,PI4KA,MCAT,HDHD5,A4GALT,PNPLA3,SULT4A1	9/-
chr16	7_Summary	GO Biological Processes	GO:0015931	nucleobase-containing compound transport	-3.72485	-0.72	3.68436e+35	ABCC6,ABCC1,NPIPA1,NUTF2,DDX19B,RBFOX1,DDX19A,ABCC11	8/-
chr12	4_Summary	GO Biological Processes	GO:0010638	positive regulation of organelle organization	-3.72046	-0.452	1.6635e+31	DDX11,P2RX7,MAPKAPK5,DNM1L,CAMKK2,ANAPC5,RESF1	7/-
chr2	5_Summary	GO Biological Processes	GO:0031998	regulation of fatty acid beta-oxidation	-3.71694	-0.213	2.16886e+38	FABP1,ABCB11,MTLN,INSIG2,LRP2,AAK1,PCYOX1,NOSTRIN	8/-
chr18	2_Summary	GO Biological Processes	GO:0002065	columnar/cuboidal epithelial cell differentiation	-3.61003	-0.414	1.00026e+28	CDH2,GATA6,TYMS,SMAD4,ROCK1,DCC,ACAA2	7/-
chr22	4_Summary	Reactome Gene Sets	R-HSA-512988	Interleukin-3, Interleukin-5 and GM-CSF signaling	-3.58084	0	139914393560	CRKL,CSF2RB,IL2RB	3/-
chr6	18_Summary	GO Biological Processes	GO:0001558	regulation of cell growth	-3.57839	-1.505	1.02633e+50	CDKN1A,HSPA1A,HSPA1B,PRKN,PPARD,CEP43,CPNE5,SLC44A4,PI16,ARMC12,MAPK14	11/-
chr2	6_Summary	GO Biological Processes	GO:0030036	actin cytoskeleton organization	-3.57554	-0.13	1.19487e+84	ADD2,NPHP1,PLEK,VIL1,ARHGAP25,KLHL41,BMP10,ANTXR1,NOSTRIN,CATIP,POTEE,EMILIN1,MAPRE3,ANKRD23,PREB,TRABD2A,MTLN	17/-
chr8	3_Summary	GO Biological Processes	GO:0060135	maternal process involved in female pregnancy	-3.54572	-0.742	285150864478	ANGPT2,CTSB,CSMD1	3/-
chr1	9_Summary	Canonical Pathways	M5885	NABA MATRISOME ASSOCIATED	-3.52951	-1.268	1.43515e+82	CSF1,CTSK,CTSS,F13B,FLG,NGF,S100A10,S100A11,TCHH,ANXA9,SEMA6C,ADAM30,ADAMTSL4,REG4,WNT3A,TCHHL1,RPTN,HRNR	18/-
chr15	4_Summary	KEGG Pathway	hsa00140	Steroid hormone biosynthesis	-3.52517	-0.052	1543154415831139	CYP1A1,CYP1A2,CYP11A1,CHRNA7	4/-
chr17	8_Summary	GO Biological Processes	GO:0006914	autophagy	-3.50988	-0.786	2.54837e+32	GAA,ITGB4,ULK2,WDR45B,RNF213,CHMP6,SMCR8	7/-
chr11	5_Summary	KEGG Pathway	hsa05224	Breast cancer	-3.47453	-0.445	5.95225e+80	CCND1,FGF3,FGF4,LRP5,RPS6KB2,FGF19,FIBP,TCIRG1,RELA,AIP,CFL1,SSH3,PPP1CA,CTTN,GSTP1,FADD,MAP3K11,FOSL1,SPTBN2,RCE1	20/-
chr19	9_Summary	GO Biological Processes	GO:0097242	amyloid-beta clearance	-3.47323	-0.602	7.18364e+31	C3,INSR,ABCA7,AZU1,CNN2,PRTN3,LILRB1,VAV1	8/-
chr11	6_Summary	KEGG Pathway	hsa00340	Histidine metabolism	-3.46995	-0.445	2.21223e+16	ALDH3B1,ALDH3B2,CARNS1,LRTOMT	4/-
chr15	5_Summary	Reactome Gene Sets	R-HSA-9012999	RHO GTPase cycle	-3.46319	-0.052	1.44598e+31	CSK,ARHGAP11A,CYFIP1,PEAK1,ARHGAP11B,GOLGA8R	6/-
chr6	19_Summary	GO Biological Processes	GO:0008285	negative regulation of cell population proliferation	-3.45608	-1.4	1.99103e+71	AIF1,CDKN1A,CSNK2B,GABBR1,HLA-DRB1,HLA-G,HSPA1A,HSPA1B,LTA,PPARD,RPS6KA2,NR2E1,TNF,LST1,HLA-A,HLA-F,MICA	17/-
chr1	10_Summary	GO Biological Processes	GO:0050767	regulation of neurogenesis	-3.45296	-1.198	4.80363e+73	NGF,S100A10,SKI,SEMA6C,CERS2,GJC2,AMIGO1,PRUNE1,TRIM11,WNT3A,ASPM,HES5,LINGO4,FCGR2B,PIAS3	15/-
chr4	4_Summary	GO Biological Processes	GO:0040007	growth	-3.45176	-0.269	6.58191e+24	BMPR1B,EDNRA,EVC,PDLIM5,PSAPL1,ADRA2C	6/-
chr11	7_Summary	GO Biological Processes	GO:0060349	bone morphogenesis	-3.41613	-0.43	8.92249e+35	ACTN3,FGF4,INPPL1,LRP5,LTBP3,TCIRG1,CPT1A,PC,GAL3ST3	9/-
chr12	5_Summary	GO Biological Processes	GO:0006635	fatty acid beta-oxidation	-3.41407	-0.271	3.52258e+23	ACADS,ABCD2,ACAD10,DNM1L,LRRK2,ALDH2	6/-
chr2	7_Summary	GO Biological Processes	GO:0072330	monocarboxylic acid biosynthetic process	-3.41089	-0.055	1.59386e+74	CYP27A1,ABCB11,DHRS9,PRKAG3,THNSL2,ABHD1,INSIG2,KDM3A,G6PC2,ST3GAL5,GPAT2,CERS6,ANKRD23,MTLN,LRP2	15/-
chr7	4_Summary	GO Biological Processes	GO:0070830	bicellular tight junction assembly	-3.40337	-0.335	1.36414e+22	CLDN4,CLDN3,MICALL2,NCF1,BAZ1B	5/-
chr6	20_Summary	GO Biological Processes	GO:0034655	nucleobase-containing compound catabolic process	-3.40331	-1.358	1.79733e+34	DXO,HSPA1A,HSPA1B,SKIC2,RNASET2,PDE10A,NUDT3,LSM2	8/-
chr15	6_Summary	GO Biological Processes	GO:0099565	chemical synaptic transmission, postsynaptic	-3.38811	-0.041	1.1399e+47	CHRNA7,CHRFAM7A,INSYN1,NPTN,CPLX3,CSK,SEMA7A,CYFIP1,PEAK1,PML	10/-
chr20	2_Summary	GO Biological Processes	GO:0006909	phagocytosis	-3.38055	0	3.05598e+16	HCK,TM9SF4,XKR7,BCL2L1	4/-
chr2	8_Summary	Reactome Gene Sets	R-HSA-68882	Mitotic Anaphase	-3.37337	-0.055	6.99106e+48	BUB1,CENPA,CHMP3,SPC25,TUBA3D,NUP35,RNF103-CHMP3,NCAPH,MZT2A	9/-
chr16	8_Summary	GO Biological Processes	GO:1901214	regulation of neuron death	-3.37203	-0.569	1.61201e+57	AARS1,CLN3,NQO1,ITGAM,CORO1A,NUPR1,VPS35,THAP11,MEAK7,CES1,TBC1D10B,RBFOX1,SPNS1	13/-
chr12	6_Summary	GO Biological Processes	GO:0120031	plasma membrane bounded cell projection assembly	-3.3236	-0.271	5.02785e+32	P2RX7,UNC119B,FGD4,CCDC63,RILPL2,RILPL1	6/-
chr16	9_Summary	Reactome Gene Sets	R-HSA-2142691	Synthesis of Leukotrienes (LT) and Eoxins (EX)	-3.32162	-0.53	43636417464180	ABCC1,DPEP2,DPEP3	3/-
chr1	11_Summary	Reactome Gene Sets	R-HSA-1236975	Antigen processing-Cross presentation	-3.31787	-1.07	1.52022e+180	CTSS,FCGR1A,PSMA5,PSMB4,PSMD4,SEC22B,CSF1,AKT3,ATF6,APH1A,WNT3A,CALML6,ARF1,CTSK,FCGR2B,FCGR3A,TNFRSF14,CD160,RNF115,TRIM11,THEM4,SH2D1B,OAZ3,PRDX1,TXNIP,COX20,SDHC,ARNT,CTH,SARS1,TSHB,PHGDH,SERINC2,MCL1,RORC,TRIM17,H3C14,H3C15,H3C13	39/-
chr11	8_Summary	GO Biological Processes	GO:2001236	regulation of extrinsic apoptotic signaling pathway	-3.30786	-0.401	2.0173e+25	CTTN,GSTP1,PPP1CA,RELA,FADD,PELI3	6/-
chr11	9_Summary	GO Biological Processes	GO:0043153	entrainment of circadian clock by photoperiod	-3.30173	-0.401	5.49959e+46	PPP1CA,RBM4,RBM4B,KAT5,KDM2A,CCND1,RAD9A,RELA,PITPNM1,CABP4,CPT1A	11/-
chr3	5_Summary	GO Biological Processes	GO:0061024	membrane organization	-3.29112	0	8.5964e+42	CAV3,SEC13,RFTN1,VPS8,SEC61A1,EMC3,CHCHD6,RFT1,STX19	9/-
chr17	9_Summary	GO Biological Processes	GO:0007005	mitochondrion organization	-3.2747	-0.668	4.88472e+38	NPTX1,TOP3A,TMEM11,TIMM22,WDR45B,MYO19,MIEF2,NDUFAF8	8/-
chr11	10_Summary	GO Biological Processes	GO:0031529	ruffle organization	-3.25048	-0.365	3.6361e+22	INPPL1,TCIRG1,CORO1B,FADD,PACS1	5/-
chr8	4_Summary	GO Biological Processes	GO:0048285	organelle fission	-3.21034	-0.444	5.88596e+32	RAD21,ARHGEF10,MTFR1,RMDN1,PINX1,USP17L2,MCPH1	7/-
chr16	10_Summary	WikiPathways	WP3612	Photodynamic therapy-induced NFE2L2 (NRF2) survival signaling	-3.20197	-0.434	3.68107e+24	ABCC6,CES1,NQO1,SLC5A2,SLC6A2,CES5A	6/-
chr15	7_Summary	GO Biological Processes	GO:0046777	protein autophosphorylation	-3.18916	0	1.19814e+25	CLK3,CSK,ULK3,PEAK1,PML,SEMA7A	6/-
chr11	11_Summary	GO Biological Processes	GO:0045786	negative regulation of cell cycle	-3.18108	-0.325	5.95502e+62	CCND1,OVOL1,RAD9A,SIPA1,CDK2AP2,RBM14,IPO7,STK33,MUS81,KAT5,POLD4,LRP5,NUMA1,ANAPC15	14/-
chr1	12_Summary	GO Biological Processes	GO:0070507	regulation of microtubule cytoskeleton organization	-3.16623	-0.938	3.19297e+73	HNRNPU,PDE4DIP,WDR47,GPSM2,PRUNE1,PSRC1,WNT3A,PRKCZ,CROCC,SDCCAG8,CGN,CFAP74,SPAG17,ASPM,SRGAP2C	15/-
chr11	12_Summary	Reactome Gene Sets	R-HSA-199991	Membrane Trafficking	-3.16507	-0.325	1.56202e+54	GRK2,CTTN,FOLR1,SPTBN2,DENND2B,RIN1,DENND5A,PPP6R3,KLC2,RAB1B,CNIH2,TBC1D10C	12/-
chr5	3_Summary	WikiPathways	WP405	Eukaryotic transcription initiation	-3.15285	0	2.96669e+39	GTF2H2,TAF7,GTF2H2C,SMN1,SMN2,HDAC3,TRIP13,ICE1,BDP1	9/-
chr7	5_Summary	GO Biological Processes	GO:0032418	lysosome localization	-3.14923	-0.182	7.46227e+30	LAT2,RABGEF1,TMEM106B,STX1A,SCIN,ZP3,PTPRN2	7/-
chr17	10_Summary	GO Biological Processes	GO:0140352	export from cell	-3.14598	-0.584	3.9934e+61	LLGL2,LLGL1,NSF,CCL3,SLC47A1,MYO19,SLC47A2,TRARG1,CRK,CCL4,FSCN2,ACTG1,YWHAE,EPN2	14/-
chr2	9_Summary	Reactome Gene Sets	R-HSA-9668328	Sealing of the nuclear envelope (NE) by ESCRT-III	-3.14107	0	5.16521e+35	CHMP3,TUBA3D,RNF103-CHMP3,NUP35,PRKAG3,ATG9A	6/-
chr17	11_Summary	GO Biological Processes	GO:0015695	organic cation transport	-3.11369	-0.566	5.52446e+21	SLC47A1,SLC25A19,SLC47A2,SLC26A11	4/-
chr11	13_Summary	GO Biological Processes	GO:0048041	focal adhesion assembly	-3.10867	-0.32	8.92017e+19	ACTN3,CTTN,RHOD,PPFIA1,AKIP1	5/-
chr11	14_Summary	WikiPathways	WP4659	Gastrin signaling pathway	-3.09908	-0.32	5.9543e+64	CCND1,MAP3K11,RELA,KAT5,RHOD,RPS6KB2,FADD,ANAPC15,RAD9A,CPT1A,PPP1CA,HBG2,KDM2A,BRMS1,KMT5B	15/-
chr1	13_Summary	Reactome Gene Sets	R-HSA-9009391	Extra-nuclear estrogen signaling	-3.09571	-0.881	2.77328e+30	GNAI3,GNB1,PRKCZ,AKT3,UHMK1,PTGER3,TSHB	7/-
chr1	14_Summary	GO Biological Processes	GO:0034587	piRNA processing	-3.08106	-0.869	1.10221e+16	TDRKH,HENMT1,ANKRD34A	3/-
chr3	6_Summary	GO Biological Processes	GO:0000902	cell morphogenesis	-3.07534	0	5.36174e+38	PLXNA1,VHL,BAP1,CNTN6,SEMA3G,TMEM108,CNTN4,ARL13B	8/-
chr12	7_Summary	GO Biological Processes	GO:0140352	export from cell	-3.06998	-0.11	5.02769e+33	P2RX7,HNF1A,DNM1L,ERP29,RPH3A,SYT10,ABCB9	7/-
chr2	10_Summary	Reactome Gene Sets	R-HSA-5694530	Cargo concentration in the ER	-3.06055	0	7.0391e+36	TGFA,PREB,LMAN2L,GFPT1,EIF2AK3,PDIA6,ST3GAL5,TUBA3D	8/-
chr3	7_Summary	GO Biological Processes	GO:0044089	positive regulation of cellular component biogenesis	-3.0426	0	8.59502e+70	CAV3,OXTR,TWF2,CRBN,GHRL,BRK1,LRRN1,PLXNA1,MAP3K13,SEMA3G,BAP1,RFTN1,GATA2,VHL,BFSP2,VPS8	16/-
chr22	5_Summary	GO Biological Processes	GO:0030031	cell projection assembly	-3.04246	0	5.88093e+31	RAC2,SNAP29,IFT27,TTLL1,PARVB,PARVG,CRKL	7/-
chr9	1_Summary	GO Biological Processes	GO:2000736	regulation of stem cell differentiation	-3.01189	0	48512308125920	NOTCH1,KDM4C,NELFB	3/-
chr16	11_Summary	GO Biological Processes	GO:1904357	negative regulation of telomere maintenance via telomere lengthening	-2.9935	-0.289	6.50578e+59	ACD,SLX1B,SLX1A,PARN,USP7,ATMIN,SH2B1,FHOD1,SMPD3,VPS35,MYLK3,CARMIL2	12/-
chr5	4_Summary	GO Biological Processes	GO:0031648	protein destabilization	-2.98268	0	8.29326e+23	SERF1A,FBXO4,SERF1B,FGF10,B4GALT7	5/-
chr5	5_Summary	KEGG Pathway	hsa00280	Valine, leucine and isoleucine degradation	-2.98268	0	3157501964087	HMGCS1,OXCT1,MCCC2	3/-
chr16	12_Summary	Reactome Gene Sets	R-HSA-382551	Transport of small molecules	-2.96132	-0.286	3.68487e+80	ABCC6,ATP2A1,LCAT,ABCC1,PSMB10,SLC5A2,SLC6A2,SLC9A5,SLC12A4,SLC7A6,ATP6V0D1,ATP2C2,APOBR,ABCC11,CLN3,SPNS1,BOLA2,BOLA2B,NQO1	19/-
chr16	13_Summary	GO Biological Processes	GO:0001816	cytokine production	-2.94664	-0.28	47751072584901	NFATC3,NFAT5,NFATC2IP	3/-
chr7	6_Summary	GO Biological Processes	GO:0040007	growth	-2.94179	-0.026	3.4754e+29	IFRD1,LIMK1,EIF4H,FZD9,INTS1,NCAPG2,ZP3	7/-
chr17	12_Summary	Reactome Gene Sets	R-HSA-199991	Membrane Trafficking	-2.93193	-0.448	7.12885e+38	ACTG1,GRB2,MYO1C,NSF,YWHAE,EPN2,GGA3,CHMP6,TBC1D16	9/-
chr18	3_Summary	GO Biological Processes	GO:0040007	growth	-2.89925	-0.024	2.62741e+16	GATA6,SMAD4,TYMS,MEX3C	4/-
chr12	8_Summary	GO Biological Processes	GO:0060047	heart contraction	-2.88641	-0.093	4.63353e+22	MYL2,PKP2,DNM1L,P2RX4,SLC2A13	5/-
chr13	4_Summary	GO Biological Processes	GO:0006351	DNA-templated transcription	-2.87891	0	2.97137e+23	GTF3A,PDX1,POLR1D,PCID2,GSX1	5/-
chr1	15_Summary	GO Biological Processes	GO:0009725	response to hormone	-2.86262	-0.704	1.43515e+82	CSF1,CTSK,CTSS,GNB1,GSTM3,HCRTR1,HMGCS2,HNRNPU,HSD3B1,HSD3B2,DDR2,PRKCZ,SORT1,STXBP3,TSHB,PIAS3,TXNIP,ECM1,TUFT1,WNT3A	20/-
chr1	16_Summary	GO Biological Processes	GO:0002252	immune effector process	-2.85174	-0.696	2.20922e+51	FCGR1A,FCGR2B,FCGR3A,CFHR2,NOTCH2,PRDX1,RORC,STXBP3,CFHR4,CFHR5,SH2D1B,F13B	12/-
chr18	4_Summary	GO Biological Processes	GO:0044242	cellular lipid catabolic process	-2.84142	-0.006	9.3881e+23	LIPG,ACAA2,ABHD3,ENOSF1,GATA6	5/-
chr3	8_Summary	GO Biological Processes	GO:0043462	regulation of ATP-dependent activity	-2.83793	0	4171713454106	MCM2,TNNC1,TLR9	3/-
chr11	15_Summary	GO Biological Processes	GO:0030010	establishment of cell polarity	-2.83168	-0.183	4.92665e+31	NUMA1,SIPA1,TCIRG1,KAT5,FAM89B,ANAPC15,CFL1	7/-
chr16	14_Summary	GO Biological Processes	GO:0042177	negative regulation of protein catabolic process	-2.83128	-0.216	1.72879e+27	NQO1,USP7,N4BP1,SF3B3,VPS35,SGF29	6/-
chr1	17_Summary	GO Biological Processes	GO:0030010	establishment of cell polarity	-2.79964	-0.647	5.59011e+29	PRKCZ,SDCCAG8,CRB1,GPSM2,SNX27,HES5	6/-
chr22	6_Summary	GO Biological Processes	GO:0044242	cellular lipid catabolic process	-2.79956	0	4.66827e+19	NAGA,MCAT,PNPLA3,PNPLA5	4/-
chr22	7_Summary	GO Biological Processes	GO:0009566	fertilization	-2.79135	0	1.39915e+35	CRKL,RIMBP3C,WBP2NL,RIMBP3B,SSTR3,TTLL1,IFT27	7/-
chr3	9_Summary	Reactome Gene Sets	R-HSA-9716542	Signaling by Rho GTPases, Miro GTPases and RHOBTB3	-2.7897	0	5.36164e+36	PLXNA1,SEC13,VHL,SRGAP3,NISCH,EMC3,BRK1,ARL13B	8/-
chr5	6_Summary	GO Biological Processes	GO:1901215	negative regulation of neuron death	-2.78109	0	2.69047e+21	GHR,NAIP,PCDHGC3,PCDHGC5,PCDHGC4	5/-
chr20	3_Summary	GO Biological Processes	GO:0007507	heart development	-2.77086	0	2.35099e+21	POFUT1,MYLK2,CCM2L,ASXL1	4/-
chr16	15_Summary	GO Biological Processes	GO:0046470	phosphatidylcholine metabolic process	-2.76709	-0.175	3.93184e+22	LCAT,PLA2G10,PLA2G15,LPCAT2,SMPD3	5/-
chr9	2_Summary	GO Biological Processes	GO:0008593	regulation of Notch signaling pathway	-2.75501	0	48515116292714	NOTCH1,EGFL7,ARRDC1	3/-
chr2	11_Summary	Reactome Gene Sets	R-HSA-8955332	Carboxyterminal post-translational modifications of tubulin	-2.75375	0	965460509113457	TTLL4,AGBL5,TUBA3D	3/-
chr21	2_Summary	GO Biological Processes	GO:0009150	purine ribonucleotide metabolic process	-2.72904	0	4731515223181	NDUFV3,PDE9A,DIP2A	3/-
chr1	18_Summary	GO Biological Processes	GO:0001954	positive regulation of cell-matrix adhesion	-2.72005	-0.578	1307143555906281	COL16A1,CSF1,PRKCZ,S100A10	4/-
chr11	16_Summary	GO Biological Processes	GO:0034329	cell junction assembly	-2.71234	-0.163	8.92018e+44	ACTN3,CTTN,SPTBN2,SHANK2,RHOD,CNTN5,NPAS4,PPFIA1,LRFN4,SYT12	10/-
chr12	9_Summary	GO Biological Processes	GO:1901796	regulation of signal transduction by p53 class mediator	-2.69646	-0.016	855080196387893	MAPKAPK5,RNF34,KMT5A	3/-
chr1	19_Summary	GO Biological Processes	GO:2000737	negative regulation of stem cell differentiation	-2.69291	-0.557	3.1929e+43	HNRNPU,WNT3A,HES5,SORT1,SKI,TMOD4,PLEKHO1,OBSCN,SYPL2	9/-
chr7	7_Summary	GO Biological Processes	GO:0071333	cellular response to glucose stimulus	-2.68903	0	5.79951e+29	PTPRN2,MLXIPL,NCF1,FZD9,TMEM106B,KCTD7	6/-
chr22	8_Summary	KEGG Pathway	hsa01522	Endocrine resistance	-2.67681	0	6.38156e+20	BIK,CYP2D7,CYP2D6,PNPLA3,MCAT	5/-
chr11	17_Summary	GO Biological Processes	GO:0010035	response to inorganic substance	-2.65904	-0.154	5.9555e+56	CCND1,PPP1CA,RELA,SIPA1,FOSL1,TESMIN,CCS,IL18BP,TCIRG1,SYT12,ALDH3B1,GSTP1,NDUFS8,BANF1	14/-
chr11	18_Summary	GO Biological Processes	GO:0098869	cellular oxidant detoxification	-2.6585	-0.154	2950304630489973	GSTP1,HBE1,HBG2,CCS	4/-
chr2	12_Summary	GO Biological Processes	GO:0035082	axoneme assembly	-2.65085	0	2.71481e+62	STK36,DNAAF10,CFAP65,FSIP2,CENPA,TTLL4,MAPRE3,SPC25,TUBA3D,KCNF1,BBS5,CATIP	12/-
chr3	10_Summary	WikiPathways	WP4018	Clear cell renal cell carcinoma pathways	-2.63401	0	7428831455193	VHL,BAP1,PBRM1	3/-
chr7	8_Summary	Canonical Pathways	M3008	NABA ECM GLYCOPROTEINS	-2.61969	0	2.00678e+18	ELN,ZP3,POMZP3,VWDE	4/-
chr11	19_Summary	GO Biological Processes	GO:0032365	intracellular lipid transport	-2.60793	-0.154	1.37422e+30	CPT1A,TPCN2,TMEM41B,TCIRG1,LAMTOR1,RAB1B	6/-
chr8	5_Summary	GO Biological Processes	GO:0042692	muscle cell differentiation	-2.60791	0	2.62631e+17	GATA4,NRG1,MYOM2,SGCZ	4/-
chr13	5_Summary	GO Biological Processes	GO:0071902	positive regulation of protein serine/threonine kinase activity	-2.60524	0	2.32286e+16	FLT3,TNFSF11,RGCC,PDX1	4/-
chr1	20_Summary	KEGG Pathway	hsa04744	Phototransduction	-2.60228	-0.484	27802782163688	GNAT2,GNB1,CALML6	3/-
chr3	11_Summary	GO Biological Processes	GO:0043405	regulation of MAP kinase activity	-2.59527	0	8.59185e+40	CAV3,DUSP7,MAP3K13,TLR9,CRBN,STIMATE,OXTR,GHRL,JAGN1	9/-
chr5	7_Summary	GO Biological Processes	GO:1905039	carboxylic acid transmembrane transport	-2.58082	0	8.38841e+22	SLC25A2,EMB,SLC6A19,SLC6A18	4/-
chr3	12_Summary	Reactome Gene Sets	R-HSA-2990846	SUMOylation	-2.57853	0	6.30464e+16	SATB1,SEC13,VHL,SENP2	4/-
chr7	9_Summary	KEGG Pathway	hsa04666	Fc gamma R-mediated phagocytosis	-2.56874	0	3.98485e+23	LIMK1,SCIN,NCF1,ELN,MICALL2	5/-
chr9	3_Summary	GO Biological Processes	GO:0030163	protein catabolic process	-2.56666	0	4.85172e+32	NOTCH1,TRAF2,MAN1B1,ANAPC2,DPP7,FBXW5,ARRDC1	7/-
chr4	5_Summary	GO Biological Processes	GO:0000902	cell morphogenesis	-2.56374	0	6.58191e+18	BMPR1B,EDNRA,MSX1,UNC5C,WDR1	5/-
chr3	13_Summary	GO Biological Processes	GO:0007420	brain development	-2.55818	0	4.91218e+35	ATP2B2,FANCD2,GATA2,OXTR,PLXNA1,TMEM108,CNTN4,ARL13B	8/-
chr13	6_Summary	GO Biological Processes	GO:0046474	glycerophospholipid biosynthetic process	-2.54961	0	910793492160851	MTMR6,TPTE2,DGKH	3/-
chr17	13_Summary	Canonical Pathways	M121	PID MTOR 4PATHWAY	-2.54849	-0.21	7.53197e+27	YWHAE,ULK2,RPTOR,FOXK2,SMCR8,NUP85	6/-
chr5	8_Summary	WikiPathways	WP2525	Trans-sulfuration, one-carbon metabolism and related pathways	-2.54671	0	6.35237e+22	BHMT,BHMT2,DMGDH,MCCC2,SLC25A2	5/-
chr17	14_Summary	GO Biological Processes	GO:0044057	regulation of system process	-2.54161	-0.207	2.54838e+34	GAA,KCNJ12,NPTX1,CCL3,YWHAE,EIF4A3,BAIAP2,ENPP7	8/-
chr22	9_Summary	GO Biological Processes	GO:1902074	response to salt	-2.51215	0	7.0614e+20	TSPO,CRKL,P2RX6,CACNG2,PNPLA3	5/-
chr7	10_Summary	GO Biological Processes	GO:0006612	protein targeting to membrane	-2.50701	0	2.73422e+38	RABGEF1,VPS37D,NCF1,STX1A,POM121,ZFAND2A,POM121C	7/-
chr3	14_Summary	GO Biological Processes	GO:0007029	endoplasmic reticulum organization	-2.49857	0	299275583184522	SEC61A1,EMC3,JAGN1	3/-
chr16	16_Summary	GO Biological Processes	GO:0045454	cell redox homeostasis	-2.49543	0	1.72855e+47	NQO1,BOLA2,BOLA2B,IL27,ITGAM,ITGAX,MMP2,PSMB10,N4BP1,IL34	10/-
chr11	20_Summary	GO Biological Processes	GO:0051494	negative regulation of cytoskeleton organization	-2.48039	-0.092	6.71285e+22	SPTBN2,PPFIA1,RBM14,SSH3,CORO1B	5/-
chr16	17_Summary	GO Biological Processes	GO:0048729	tissue morphogenesis	-2.46443	0	2.29423e+50	FOXF1,FOXL1,FOXC2,MMP2,TGFB1I1,PLA2G10,MYL11,ARMC5,ESRP2,DNAAF1,CARMIL2	11/-
chr16	18_Summary	GO Biological Processes	GO:0002285	lymphocyte activation involved in immune response	-2.46428	0	9.30339e+34	CD19,IRF8,ITGAL,CORO1A,EXOSC6,LAT,CLN3,ITGAM	8/-
chr5	9_Summary	GO Biological Processes	GO:0007584	response to nutrient	-2.46125	0	4.11502e+31	ARSB,OXCT1,CCL28,SLC6A19,GHR,CARTPT,JMY	7/-
chr2	13_Summary	GO Biological Processes	GO:0022412	cellular process involved in reproduction in multicellular organism	-2.45266	0	3.54949e+40	IHH,NPHP1,NCAPH,KDM3A,GMCL1,CFAP65,FIGLA,FSIP2	8/-
chr8	6_Summary	GO Biological Processes	GO:0009749	response to glucose	-2.44574	0	2852626169026	ANGPT2,GATA4,SLC30A8	3/-
chr10	1_Summary	GO Biological Processes	GO:0006066	alcohol metabolic process	-2.44117	0	3422363291734	IDI1,INPP5A,IDI2	3/-
chr17	15_Summary	KEGG Pathway	hsa04921	Oxytocin signaling pathway	-2.43515	-0.133	7.13769e+18	ACTG1,KCNJ12,MAPK7,KCNJ18	4/-
chr18	5_Summary	Reactome Gene Sets	R-HSA-422475	Axon guidance	-2.43246	0	1630609361397525	DCC,ROCK1,RPL17,YES1	4/-
chr9	4_Summary	GO Biological Processes	GO:0007283	spermatogenesis	-2.42182	0	4.85166e+30	NOTCH1,SMARCA2,TMEM203,SPATA31A6,SPATA31A1,SPATA31A3	6/-
chr17	16_Summary	GO Biological Processes	GO:0090316	positive regulation of intracellular protein transport	-2.4152	-0.121	4.64175e+23	MYO1C,YWHAE,CEP131,MIEF2,B9D1	5/-
chr16	19_Summary	KEGG Pathway	hsa04260	Cardiac muscle contraction	-2.40101	0	487132713397385	ATP2A1,COX4I1,COX6A2,UQCRC2	4/-
chr8	7_Summary	GO Biological Processes	GO:0045861	negative regulation of proteolysis	-2.35864	0	1.50821e+17	CTSB,CLN8,EIF3H,USP17L2	4/-
chr4	6_Summary	GO Biological Processes	GO:0007005	mitochondrion organization	-2.34812	0	9.87191e+18	LRBA,EDNRA,SPATA18,SMIM20	4/-
chr2	14_Summary	GO Biological Processes	GO:0002009	morphogenesis of an epithelium	-2.34739	0	3.5494e+73	IHH,LRP2,NPHP1,PPP3R1,WNT6,SEMA4C,WNT10A,BBS5,BMP10,ADRA2B,ITGAV,TGFA,EIF2AK3,DUSP2,EN1,INSIG2,ANTXR1	17/-
chr9	5_Summary	KEGG Pathway	hsa05020	Prion disease	-2.34146	0	7332902485110383	C8G,GRIN1,NOTCH1,TUBB4B	4/-
chr19	10_Summary	GO Biological Processes	GO:0007254	JNK cascade	-2.34108	0	1004511184148170	SH2D3A,MAP4K1,CDC42EP5	3/-
chr16	20_Summary	GO Biological Processes	GO:0070661	leukocyte proliferation	-2.33357	0	9.3057e+22	CD19,PSMB10,CORO1A,ARMC5,IL34	5/-
chr9	6_Summary	GO Biological Processes	GO:0046434	organophosphate catabolic process	-2.33147	0	954375775377841	ENTPD2,PNPLA7,ENTPD8	3/-
chr8	8_Summary	GO Biological Processes	GO:0042886	amide transport	-2.32939	0	2055157724169026	CLN8,SLC7A13,SLC30A8	3/-
chr2	15_Summary	KEGG Pathway	hsa05014	Amyotrophic lateral sclerosis	-2.30373	0	1.32918e+41	COX5B,DNAH6,PPP3R1,EIF2AK3,ACTR1B,TUBA3D,NUP35,WNT6,WNT10A	9/-
chr18	6_Summary	GO Biological Processes	GO:0032259	methylation	-2.30094	0	6632729830827	SNRPD1,TYMS,CXXC1	3/-
chr3	15_Summary	Reactome Gene Sets	R-HSA-1799339	SRP-dependent cotranslational protein targeting to membrane	-2.30018	0	61842897229927	RPN1,SPCS1,SEC61A1	3/-
chr3	16_Summary	GO Biological Processes	GO:0019827	stem cell population maintenance	-2.28955	0	2177262426354	FANCD2,GATA2,GNL3	3/-
chr20	4_Summary	GO Biological Processes	GO:1902903	regulation of supramolecular fiber organization	-2.28553	0	3.05534e+21	HCK,ID1,TPX2,MYLK2,FOXS1	5/-
chr12	10_Summary	GO Biological Processes	GO:0031329	regulation of cellular catabolic process	-2.23135	0	2.25503e+45	ABCD2,P2RX7,DNM1L,CAMKK2,LRRK2,ETFBKMT,PITPNM2,RILPL2,RILPL1	9/-
chr2	16_Summary	GO Biological Processes	GO:0042476	odontogenesis	-2.22884	0	3.69475e+17	ITGB6,WNT6,CNNM4,WNT10A	4/-
chr2	17_Summary	Reactome Gene Sets	R-HSA-72203	Processing of Capped Intron-Containing Pre-mRNA	-2.22518	0	5.09366e+27	PCBP1,SNRPG,PPIG,SNRNP27,SNRNP200,NUP35	6/-
chr2	18_Summary	GO Biological Processes	GO:0071248	cellular response to metal ion	-2.21523	0	3.77766e+49	KCNK3,SLC11A1,EIF2AK3,ABCB6,STK39,COX5B,ITGAV,KCNF1,CNNM4,PCYOX1,ATP6V1C2	11/-
chr12	11_Summary	GO Biological Processes	GO:0006886	intracellular protein transport	-2.21365	0	1.05261e+32	IPO8,ERP29,RPH3A,LRRK2,RILPL2,RILPL1	6/-
chr5	10_Summary	GO Biological Processes	GO:0032273	positive regulation of protein polymerization	-2.17891	0	1.10769e+23	TPPP,FCHSD1,OCLN,ICE1	4/-
chr3	17_Summary	GO Biological Processes	GO:0033044	regulation of chromosome organization	-2.15371	0	4.17186e+22	MCM2,RUVBL1,GNL3,PBRM1,SENP2	5/-
chr13	7_Summary	GO Biological Processes	GO:0051604	protein maturation	-2.14821	0	2155428579612	F7,MIPEP,NAA16	3/-
chr12	12_Summary	GO Biological Processes	GO:0140694	non-membrane-bounded organelle assembly	-2.14542	0	636463361286311	BICD1,MYL2,RPL6,ATXN2	4/-
chr12	13_Summary	GO Biological Processes	GO:0006518	peptide metabolic process	-2.14512	0	6.12823e+24	RPL6,ABCB9,YARS2,MTRFR,SPPL3	5/-
chr10	2_Summary	GO Biological Processes	GO:0098771	inorganic ion homeostasis	-2.13737	0	66478326507	BNIP3,CACNB2,CNNM1	3/-
chr19	11_Summary	Reactome Gene Sets	R-HSA-72163	mRNA Splicing - Major Pathway	-2.09043	0	3.19154e+21	HNRNPL,POLR2E,PTBP1,PRPF31,LENG1	5/-
chr2	19_Summary	GO Biological Processes	GO:0016311	dephosphorylation	-2.0713	0	1.84455e+23	DUSP2,PPP3R1,THNSL2,CTDSP1,DUSP19	5/-
chr2	20_Summary	GO Biological Processes	GO:0051129	negative regulation of cellular component organization	-2.07107	0	1.19699e+43	ADD2,BUB1,ITGAV,VIL1,EMILIN1,SEMA4C,SLC35F6,DPYSL5,SPC25,ANTXR1	10/-
chr4	7_Summary	GO Biological Processes	GO:0030099	myeloid cell differentiation	-2.06926	0	3516994855646	RBPJ,WDR1,LYAR	3/-
chr17	17_Summary	KEGG Pathway	hsa04064	NF-kappa B signaling pathway	-2.05208	0	6351956079092	CCL4,CCL4L2,CARD14	3/-
chr19	12_Summary	GO Biological Processes	GO:0051056	regulation of small GTPase mediated signal transduction	-2.04178	0	7.40923e+29	VAV1,SIPA1L3,ARHGEF18,ARHGAP45,EPS8L1,RASGRP4	6/-
chr22	10_Summary	GO Biological Processes	GO:0006886	intracellular protein transport	-2.01868	0	7.06104e+27	TSPO,CACNG2,IFT27,SAMM50,GGA1,ARFGAP3	6/-
chr22	11_Summary	Canonical Pathways	M5880	NABA ECM AFFILIATED	-2.01087	0	3957114794114904	LGALS2,ELFN2,C1QTNF6	3/-

## Sheet: Supplementary Table7
Supplementary Table 7. The Enrichment of GWAS signals in Complex_Region.
Trait	Complex_Region_Num	Hg38_Num	Complex_Region_Rate	Hg38_Rate	Fold	P	P_adjust
Response to trametinib	6	6	2.41264e-08	1.94282e-09	12.4182	7.9915e-07	0.000105887
Medium HDL particle concentration	7	7	2.81474e-08	2.26663e-09	12.4182	7.69776e-08	1.33037e-05
C-C motif chemokine 4 levels	6	14	2.41264e-08	4.53326e-09	5.32208	0.00121034	0.049599
Large HDL particle concentration	10	14	4.02106e-08	4.53326e-09	8.87014	4.77491e-08	8.6274e-06
Hair curvature (observational)	3	3	1.20632e-08	9.71412e-10	12.4182	0.000894045	0.0399307
Phosphatidylethanolamine(40:2)_[M-H]1- levels	23	27	9.24844e-08	8.74271e-09	10.5785	5.02237e-20	3.99279e-17
Cholesteryl ester(20:3)_[M+NH4]1+ levels	34	67	1.36716e-07	2.16949e-08	6.30177	1.55429e-17	8.82613e-15
High chromosomal aberration frequency (total)	4	6	1.60842e-08	1.94282e-09	8.27879	0.00110075	0.0465475
Drinking behavior	3	3	1.20632e-08	9.71412e-10	12.4182	0.000894045	0.0399307
Triacylglycerol(56:5)_[M+NH4]1+ levels	57	57	2.29201e-07	1.84568e-08	12.4182	1.1489e-58	4.56687e-55
Serum levels of protein AMY2B	4	4	1.60842e-08	1.29522e-09	12.4182	8.61243e-05	0.00600604
White blood cell count (eosinophil)	6	11	2.41264e-08	3.56185e-09	6.77356	0.000240377	0.0144773
Serum levels of protein IL5RA	6	8	2.41264e-08	2.59043e-09	9.31364	1.8837e-05	0.00170175
Glucosuria (moderate to severe)	4	6	1.60842e-08	1.94282e-09	8.27879	0.00110075	0.0465475
Neonatal cytokine/chemokine levels (fetal genetic effect)	11	25	4.42317e-08	8.0951e-09	5.464	8.14741e-06	0.000852262
Skin flushing frequency	3	3	1.20632e-08	9.71412e-10	12.4182	0.000894045	0.0399307
Mean diameter of HDL particles	7	8	2.81474e-08	2.59043e-09	10.8659	5.63918e-07	7.72957e-05
Triacylglycerol(56:6)_[M+NH4]1+ levels	57	113	2.29201e-07	3.65899e-08	6.26404	3.4334e-28	6.82388e-25
Acetone levels	7	15	2.81474e-08	4.85706e-09	5.79516	0.000245862	0.0145866
Caffeine metabolism (plasma 1,3-dimethylxanthine (theophylline) level)	4	4	1.60842e-08	1.29522e-09	12.4182	8.61243e-05	0.00600604
Total cholesterol levels in large HDL	3	3	1.20632e-08	9.71412e-10	12.4182	0.000894045	0.0399307
Strabismus	9	22	3.61896e-08	7.12369e-09	5.08017	0.000110111	0.00741847
CD62L- CD86+ myeloid Dendritic Cell %Dendritic Cell	3	3	1.20632e-08	9.71412e-10	12.4182	0.000894045	0.0399307
Total cholesterol levels in HDL	7	8	2.81474e-08	2.59043e-09	10.8659	5.63918e-07	7.72957e-05
Blood and toenail selenium levels	8	12	3.21685e-08	3.88565e-09	8.27879	2.56741e-06	0.000291584
Cholesterol ester levels in very large HDL	3	3	1.20632e-08	9.71412e-10	12.4182	0.000894045	0.0399307
Circulating odd-numbered chain saturated fatty acid levels (C15:0)	10	15	4.02106e-08	4.85706e-09	8.27879	1.30746e-07	2.07885e-05
Serum levels of protein IL17RA	4	4	1.60842e-08	1.29522e-09	12.4182	8.61243e-05	0.00600604
Lysophosphatidylcholine levels	8	16	3.21685e-08	5.18087e-09	6.2091	4.67801e-05	0.00371902
Confectionary intake	3	3	1.20632e-08	9.71412e-10	12.4182	0.000894045	0.0399307
Phosphatidylcholine(38:2)_[M+H]1+/Phosphatidylethanolamine(41:2)_[M+H]1+ levels	34	48	1.36716e-07	1.55426e-08	8.79622	3.38976e-24	3.36857e-21
Gut microbiota abundance (genus Peptococcus id.2037)	4	6	1.60842e-08	1.94282e-09	8.27879	0.00110075	0.0465475
Response to erlotinib	7	8	2.81474e-08	2.59043e-09	10.8659	5.63918e-07	7.72957e-05
Sepsis in extremely premature infants	4	5	1.60842e-08	1.61902e-09	9.93455	0.000397437	0.0219418
Glucosuria	5	7	2.01053e-08	2.26663e-09	8.87014	0.000147406	0.00976563
Serum levels of protein CLPS	4	4	1.60842e-08	1.29522e-09	12.4182	8.61243e-05	0.00600604

## Sheet: Supplementary Table8
Supplementary Table 8. The Enrichment of TCGA-Cancer signals in Complex_Region.
Trait	Complex_Region_Num	Hg38_Num	Complex_Region_Rate	Hg38_Rate	Fold	P	P_adjust	Trait2
TCGA-THYM_SNP	469	3782	1.88588e-06	1.22463e-06	1.53996	0.000545408	0.00771362	TCGA-THYM(SNP)
TCGA-MESO_DEL	40	242	1.60842e-07	7.83606e-08	2.05259	0.00381656	0.04723	TCGA-MESO(DEL)
TCGA-CESC_SNP	10740	96645	4.31862e-05	3.12941e-05	1.38001	2.52055e-05	0.000623837	TCGA-CESC(SNP)
TCGA-ESCA_SNP	4574	40704	1.83923e-05	1.31801e-05	1.39546	0.000325476	0.00537036	TCGA-ESCA(SNP)
TCGA-STAD_SNP	19954	179065	8.02363e-05	5.7982e-05	1.38381	8.33604e-10	8.25268e-08	TCGA-STAD(SNP)
TCGA-PRAD_SNP	3167	27195	1.27347e-05	8.80585e-06	1.44616	4.24627e-07	1.46292e-05	TCGA-PRAD(SNP)
TCGA-KIRC_DEL	346	2490	1.39129e-06	8.06272e-07	1.72558	4.43309e-07	1.46292e-05	TCGA-KIRC(DEL)
TCGA-PAAD_SNP	3310	29047	1.33097e-05	9.40554e-06	1.41509	9.4178e-05	0.00186472	TCGA-PAAD(SNP)

## Sheet: Supplementary Table9
Supplementary Table 9. The Characterisation of viral sequence within different regions.
ID	CHR	Aligned_Len(/kb)	Viruses	Rate	Class
M	M	0.548	Others	1.77445e-07	HG38
1	1	0.066	Papillomaviridae	2.13711e-08	HG38
1	1	23.696	Poxviridae	7.67286e-06	HG38
1	1	3.765	Baculoviridae	1.21912e-06	HG38
1	1	49.695	Others	1.60914e-05	HG38
1	1	62.16	Herpesviridae	2.01277e-05	HG38
1	1	96.906	Retroviridae	3.13786e-05	HG38
2	2	0.531	Baculoviridae	1.7194e-07	HG38
2	2	10.103	Others	3.27139e-06	HG38
2	2	13.981	Retroviridae	4.52711e-06	HG38
2	2	8.248	Herpesviridae	2.67074e-06	HG38
2	2	8.812	Poxviridae	2.85336e-06	HG38
3	3	21.902	Herpesviridae	7.09196e-06	HG38
3	3	32.073	Poxviridae	1.03854e-05	HG38
3	3	56.046	Retroviridae	1.81479e-05	HG38
3	3	8.667	Others	2.80641e-06	HG38
4	4	0.045	Papillomaviridae	1.45712e-08	HG38
4	4	0.058	Baculoviridae	1.87806e-08	HG38
4	4	11.478	Poxviridae	3.71662e-06	HG38
4	4	23.081	Others	7.47372e-06	HG38
4	4	35.365	Retroviridae	1.14513e-05	HG38
4	4	8.846	Herpesviridae	2.86437e-06	HG38
5	5	0.061	Baculoviridae	1.97521e-08	HG38
5	5	15.341	Others	4.96748e-06	HG38
5	5	19.54	Herpesviridae	6.32713e-06	HG38
5	5	57.611	Retroviridae	1.86547e-05	HG38
5	5	9.549	Poxviridae	3.09201e-06	HG38
6	6	13.388	Others	4.33509e-06	HG38
6	6	15.727	Poxviridae	5.09247e-06	HG38
6	6	26.95	Herpesviridae	8.72652e-06	HG38
6	6	33.525	Retroviridae	1.08555e-05	HG38
7	7	0.089	Baculoviridae	2.88186e-08	HG38
7	7	29.657	Poxviridae	9.60306e-06	HG38
7	7	31.665	Others	1.02533e-05	HG38
7	7	41.934	Retroviridae	1.35784e-05	HG38
7	7	6.813	Herpesviridae	2.20608e-06	HG38
8	8	0.293	Baculoviridae	9.48746e-08	HG38
8	8	18.356	Herpesviridae	5.94375e-06	HG38
8	8	35.537	Retroviridae	1.1507e-05	HG38
8	8	72.573	Others	2.34994e-05	HG38
8	8	7.788	Poxviridae	2.52179e-06	HG38
9	9	0.318	Baculoviridae	1.0297e-07	HG38
9	9	13.178	Poxviridae	4.26709e-06	HG38
9	9	20.067	Others	6.49778e-06	HG38
9	9	22.636	Retroviridae	7.32963e-06	HG38
9	9	2.289	Herpesviridae	7.41188e-07	HG38
10	10	0.253	Baculoviridae	8.19225e-08	HG38
10	10	24.656	Retroviridae	7.98372e-06	HG38
10	10	26.74	Poxviridae	8.65852e-06	HG38
10	10	4.02	Others	1.30169e-06	HG38
10	10	4.9	Herpesviridae	1.58664e-06	HG38
11	11	0.062	Baculoviridae	2.00759e-08	HG38
11	11	17.151	Poxviridae	5.55357e-06	HG38
11	11	33.699	Retroviridae	1.09119e-05	HG38
11	11	63.658	Others	2.06127e-05	HG38
11	11	8.372	Herpesviridae	2.71089e-06	HG38
12	12	0.162	Flaviviridae	5.24563e-08	HG38
12	12	0.287	Baculoviridae	9.29318e-08	HG38
12	12	12.794	Poxviridae	4.14275e-06	HG38
12	12	23.324	Others	7.55241e-06	HG38
12	12	3.01	Herpesviridae	9.74651e-07	HG38
12	12	75.266	Retroviridae	2.43714e-05	HG38
13	13	0.03	Parvoviridae	9.71412e-09	HG38
13	13	17.611	Poxviridae	5.70252e-06	HG38
13	13	18.024	Others	5.83625e-06	HG38
13	13	44.269	Herpesviridae	1.43345e-05	HG38
13	13	5.269	Retroviridae	1.70612e-06	HG38
14	14	0.11	Baculoviridae	3.56185e-08	HG38
14	14	5.386	Herpesviridae	1.74401e-06	HG38
14	14	5.691	Poxviridae	1.84277e-06	HG38
14	14	8.976	Retroviridae	2.90647e-06	HG38
14	14	9.968	Others	3.22768e-06	HG38
15	15	0.034	Baculoviridae	1.10093e-08	HG38
15	15	11.918	Herpesviridae	3.8591e-06	HG38
15	15	16.14	Retroviridae	5.2262e-06	HG38
15	15	4.812	Others	1.55815e-06	HG38
15	15	7.523	Poxviridae	2.43598e-06	HG38
16	16	0.029	Baculoviridae	9.39032e-09	HG38
16	16	12.593	Retroviridae	4.07767e-06	HG38
16	16	17.94	Others	5.80905e-06	HG38
16	16	4.826	Herpesviridae	1.56268e-06	HG38
16	16	7.44	Poxviridae	2.4091e-06	HG38
17	17	10.244	Retroviridae	3.31705e-06	HG38
17	17	2.953	Poxviridae	9.56194e-07	HG38
17	17	37.152	Herpesviridae	1.203e-05	HG38
17	17	93.319	Others	3.02171e-05	HG38
18	18	16.385	Others	5.30553e-06	HG38
18	18	3.918	Herpesviridae	1.26866e-06	HG38
18	18	7.406	Retroviridae	2.39809e-06	HG38
18	18	9.321	Poxviridae	3.01818e-06	HG38
19	19	0.029	Adenoviridae	9.39032e-09	HG38
19	19	0.03	Baculoviridae	9.71412e-09	HG38
19	19	13.629	Poxviridae	4.41313e-06	HG38
19	19	29.978	Herpesviridae	9.707e-06	HG38
19	19	48.064	Others	1.55633e-05	HG38
19	19	4.898	Parvoviridae	1.58599e-06	HG38
19	19	74.828	Retroviridae	2.42296e-05	HG38
20	20	0.029	Baculoviridae	9.39032e-09	HG38
20	20	1.998	Poxviridae	6.46961e-07	HG38
20	20	3.745	Others	1.21265e-06	HG38
20	20	4.286	Retroviridae	1.38782e-06	HG38
20	20	8.226	Herpesviridae	2.66361e-06	HG38
21	21	0.515	Herpesviridae	1.66759e-07	HG38
21	21	0.548	Poxviridae	1.77445e-07	HG38
21	21	0.831	Baculoviridae	2.69081e-07	HG38
21	21	12.957	Retroviridae	4.19553e-06	HG38
21	21	6.352	Others	2.0568e-06	HG38
22	22	0.24	Baculoviridae	7.7713e-08	HG38
22	22	11.133	Herpesviridae	3.60491e-06	HG38
22	22	22.344	Retroviridae	7.23508e-06	HG38
22	22	2.43	Others	7.86844e-07	HG38
22	22	2.849	Poxviridae	9.22518e-07	HG38
23	X	10.708	Others	3.4673e-06	HG38
23	X	13.866	Retroviridae	4.48987e-06	HG38
23	X	15.282	Poxviridae	4.94838e-06	HG38
23	X	38.108	Herpesviridae	1.23395e-05	HG38
24	Y	0.212	Others	6.86465e-08	HG38
24	Y	0.276	Poxviridae	8.93699e-08	HG38
24	Y	4.839	Retroviridae	1.56689e-06	HG38
24	Y	4.922	Herpesviridae	1.59376e-06	HG38
M	M	0.548	Others	2.20354e-06	Complex_Region
1	1	0.031	Baculoviridae	1.24653e-07	Complex_Region
1	1	0.033	Papillomaviridae	1.32695e-07	Complex_Region
1	1	10.421	Poxviridae	4.19035e-05	Complex_Region
1	1	16.65	Retroviridae	6.69507e-05	Complex_Region
1	1	43.44	Herpesviridae	0.000174675	Complex_Region
1	1	4.724	Others	1.89955e-05	Complex_Region
2	2	0.27	Poxviridae	1.08569e-06	Complex_Region
2	2	0.359	Others	1.44356e-06	Complex_Region
2	2	2.65	Retroviridae	1.06558e-05	Complex_Region
2	2	5.086	Herpesviridae	2.04511e-05	Complex_Region
3	3	0.12	Herpesviridae	4.82527e-07	Complex_Region
3	3	0.508	Others	2.0427e-06	Complex_Region
3	3	0.723	Poxviridae	2.90723e-06	Complex_Region
3	3	9.508	Retroviridae	3.82323e-05	Complex_Region
4	4	0.06	Poxviridae	2.41264e-07	Complex_Region
4	4	0.101	Herpesviridae	4.06127e-07	Complex_Region
4	4	0.162	Others	6.51412e-07	Complex_Region
4	4	2.504	Retroviridae	1.00687e-05	Complex_Region
5	5	0.031	Baculoviridae	1.24653e-07	Complex_Region
5	5	0.033	Herpesviridae	1.32695e-07	Complex_Region
5	5	0.289	Others	1.16209e-06	Complex_Region
5	5	3.798	Poxviridae	1.5272e-05	Complex_Region
5	5	4.4	Retroviridae	1.76927e-05	Complex_Region
6	6	0.295	Others	1.18621e-06	Complex_Region
6	6	0.811	Poxviridae	3.26108e-06	Complex_Region
6	6	2.912	Retroviridae	1.17093e-05	Complex_Region
6	6	9.907	Herpesviridae	3.98367e-05	Complex_Region
7	7	1.294	Others	5.20325e-06	Complex_Region
7	7	2.04	Retroviridae	8.20297e-06	Complex_Region
7	7	2.072	Poxviridae	8.33164e-06	Complex_Region
7	7	2.966	Herpesviridae	1.19265e-05	Complex_Region
8	8	0.099	Poxviridae	3.98085e-07	Complex_Region
8	8	1.301	Retroviridae	5.2314e-06	Complex_Region
8	8	3.981	Herpesviridae	1.60078e-05	Complex_Region
8	8	48.083	Others	0.000193345	Complex_Region
9	9	0.157	Herpesviridae	6.31307e-07	Complex_Region
9	9	0.197	Others	7.92149e-07	Complex_Region
9	9	10.429	Retroviridae	4.19357e-05	Complex_Region
10	10	0.037	Herpesviridae	1.48779e-07	Complex_Region
10	10	0.038	Others	1.528e-07	Complex_Region
10	10	0.116	Poxviridae	4.66443e-07	Complex_Region
10	10	0.23	Retroviridae	9.24844e-07	Complex_Region
11	11	0.031	Baculoviridae	1.24653e-07	Complex_Region
11	11	0.183	Herpesviridae	7.35854e-07	Complex_Region
11	11	0.268	Poxviridae	1.07764e-06	Complex_Region
11	11	3.71	Retroviridae	1.49181e-05	Complex_Region
11	11	42.779	Others	0.000172017	Complex_Region
12	12	0.032	Baculoviridae	1.28674e-07	Complex_Region
12	12	0.313	Herpesviridae	1.25859e-06	Complex_Region
12	12	1.329	Poxviridae	5.34399e-06	Complex_Region
12	12	1.523	Others	6.12408e-06	Complex_Region
12	12	1.94	Retroviridae	7.80086e-06	Complex_Region
13	13	0.03	Parvoviridae	1.20632e-07	Complex_Region
13	13	0.214	Others	8.60507e-07	Complex_Region
13	13	0.484	Poxviridae	1.94619e-06	Complex_Region
14	14	0.039	Herpesviridae	1.56821e-07	Complex_Region
14	14	0.121	Poxviridae	4.86549e-07	Complex_Region
14	14	0.141	Others	5.6697e-07	Complex_Region
14	14	1.177	Retroviridae	4.73279e-06	Complex_Region
15	15	0.063	Herpesviridae	2.53327e-07	Complex_Region
15	15	0.128	Poxviridae	5.14696e-07	Complex_Region
15	15	0.41	Others	1.64864e-06	Complex_Region
15	15	1.184	Retroviridae	4.76094e-06	Complex_Region
16	16	0.029	Baculoviridae	1.16611e-07	Complex_Region
16	16	0.349	Herpesviridae	1.40335e-06	Complex_Region
16	16	0.533	Poxviridae	2.14323e-06	Complex_Region
16	16	0.738	Others	2.96754e-06	Complex_Region
16	16	6.313	Retroviridae	2.5385e-05	Complex_Region
17	17	0.242	Herpesviridae	9.73097e-07	Complex_Region
17	17	0.287	Poxviridae	1.15404e-06	Complex_Region
17	17	1.939	Retroviridae	7.79684e-06	Complex_Region
17	17	32.126	Others	0.000129181	Complex_Region
18	18	0.136	Herpesviridae	5.46864e-07	Complex_Region
18	18	0.147	Poxviridae	5.91096e-07	Complex_Region
18	18	0.18	Others	7.23791e-07	Complex_Region
18	18	0.328	Retroviridae	1.31891e-06	Complex_Region
19	19	0.339	Poxviridae	1.36314e-06	Complex_Region
19	19	12.783	Retroviridae	5.14012e-05	Complex_Region
19	19	31.581	Others	0.000126989	Complex_Region
19	19	4.475	Herpesviridae	1.79943e-05	Complex_Region
20	20	0.145	Others	5.83054e-07	Complex_Region
21	21	0.035	Herpesviridae	1.40737e-07	Complex_Region
21	21	0.084	Poxviridae	3.37769e-07	Complex_Region
21	21	0.308	Others	1.23849e-06	Complex_Region
21	21	0.831	Baculoviridae	3.3415e-06	Complex_Region
22	22	0.134	Poxviridae	5.38822e-07	Complex_Region
22	22	0.216	Others	8.68549e-07	Complex_Region
22	22	0.709	Retroviridae	2.85093e-06	Complex_Region
22	22	8.17	Herpesviridae	3.28521e-05	Complex_Region
23	X	0.03	Herpesviridae	1.20632e-07	Complex_Region
23	X	0.128	Poxviridae	5.14696e-07	Complex_Region
1	1	19.542	Poxviridae	6.45212e-05	HERV_Region
1	1	39.795	Others	0.00013139	HERV_Region
1	1	57.025	Herpesviridae	0.000188278	HERV_Region
1	1	72.041	Retroviridae	0.000237856	HERV_Region
2	2	11.58	Retroviridae	3.82333e-05	HERV_Region
2	2	5.608	Others	1.85158e-05	HERV_Region
2	2	5.689	Herpesviridae	1.87832e-05	HERV_Region
2	2	6.766	Poxviridae	2.23391e-05	HERV_Region
3	3	18.026	Herpesviridae	5.95159e-05	HERV_Region
3	3	30.251	Poxviridae	9.98788e-05	HERV_Region
3	3	4.447	Others	1.46825e-05	HERV_Region
3	3	50.253	Retroviridae	0.000165919	HERV_Region
4	4	20.423	Others	6.743e-05	HERV_Region
4	4	33.225	Retroviridae	0.000109698	HERV_Region
4	4	6.996	Herpesviridae	2.30985e-05	HERV_Region
4	4	9.838	Poxviridae	3.24818e-05	HERV_Region
5	5	12.893	Others	4.25684e-05	HERV_Region
5	5	18.106	Herpesviridae	5.978e-05	HERV_Region
5	5	53.889	Retroviridae	0.000177924	HERV_Region
5	5	7.44	Poxviridae	2.45644e-05	HERV_Region
6	6	13.585	Poxviridae	4.48532e-05	HERV_Region
6	6	25.447	Herpesviridae	8.40176e-05	HERV_Region
6	6	28.183	Retroviridae	9.30509e-05	HERV_Region
6	6	9.909	Others	3.27162e-05	HERV_Region
7	7	0.03	Baculoviridae	9.90501e-08	HERV_Region
7	7	25.962	Others	8.57179e-05	HERV_Region
7	7	27.276	Poxviridae	9.00563e-05	HERV_Region
7	7	34.481	Retroviridae	0.000113845	HERV_Region
7	7	4.666	Herpesviridae	1.54056e-05	HERV_Region
8	8	17.091	Herpesviridae	5.64288e-05	HERV_Region
8	8	26.456	Retroviridae	8.73489e-05	HERV_Region
8	8	6.3	Poxviridae	2.08005e-05	HERV_Region
8	8	65.374	Others	0.000215843	HERV_Region
9	9	1.158	Herpesviridae	3.82333e-06	HERV_Region
9	9	11.958	Poxviridae	3.94814e-05	HERV_Region
9	9	16.658	Others	5.49992e-05	HERV_Region
9	9	20.585	Retroviridae	6.79648e-05	HERV_Region
10	10	0.668	Others	2.20551e-06	HERV_Region
10	10	22.544	Retroviridae	7.44328e-05	HERV_Region
10	10	24.59	Poxviridae	8.1188e-05	HERV_Region
10	10	3.526	Herpesviridae	1.16417e-05	HERV_Region
11	11	15.546	Poxviridae	5.13277e-05	HERV_Region
11	11	19.647	Retroviridae	6.48679e-05	HERV_Region
11	11	21.603	Others	7.13259e-05	HERV_Region
11	11	6.808	Herpesviridae	2.24778e-05	HERV_Region
12	12	10.607	Poxviridae	3.50208e-05	HERV_Region
12	12	1.4	Herpesviridae	4.62234e-06	HERV_Region
12	12	19.348	Others	6.38807e-05	HERV_Region
12	12	71.227	Retroviridae	0.000235168	HERV_Region
13	13	16.481	Others	5.44148e-05	HERV_Region
13	13	16.665	Poxviridae	5.50223e-05	HERV_Region
13	13	3.847	Retroviridae	1.27015e-05	HERV_Region
13	13	43.345	Herpesviridae	0.000143111	HERV_Region
14	14	4.326	Poxviridae	1.4283e-05	HERV_Region
14	14	4.3	Herpesviridae	1.41972e-05	HERV_Region
14	14	6.756	Retroviridae	2.23061e-05	HERV_Region
14	14	6.839	Others	2.25801e-05	HERV_Region
15	15	10.746	Herpesviridae	3.54797e-05	HERV_Region
15	15	12.929	Retroviridae	4.26873e-05	HERV_Region
15	15	2.124	Others	7.01274e-06	HERV_Region
15	15	6.305	Poxviridae	2.0817e-05	HERV_Region
16	16	11.29	Retroviridae	3.72758e-05	HERV_Region
16	16	14.778	Others	4.87921e-05	HERV_Region
16	16	3.385	Herpesviridae	1.11761e-05	HERV_Region
16	16	6.003	Poxviridae	1.98199e-05	HERV_Region
17	17	0.992	Poxviridae	3.27526e-06	HERV_Region
17	17	105.844	Others	0.000349462	HERV_Region
17	17	8.36	Retroviridae	2.76019e-05	HERV_Region
17	17	9.532	Herpesviridae	3.14715e-05	HERV_Region
18	18	14.513	Others	4.79171e-05	HERV_Region
18	18	3.217	Herpesviridae	1.06215e-05	HERV_Region
18	18	5.999	Retroviridae	1.98067e-05	HERV_Region
18	18	8.686	Poxviridae	2.86783e-05	HERV_Region
19	19	0.03	Baculoviridae	9.90501e-08	HERV_Region
19	19	11.706	Poxviridae	3.86493e-05	HERV_Region
19	19	28.661	Herpesviridae	9.46291e-05	HERV_Region
19	19	37.013	Others	0.000122205	HERV_Region
19	19	4.898	Parvoviridae	1.61716e-05	HERV_Region
19	19	61.705	Retroviridae	0.000203729	HERV_Region
20	20	0.762	Others	2.51587e-06	HERV_Region
20	20	0.967	Retroviridae	3.19271e-06	HERV_Region
20	20	1.121	Poxviridae	3.70117e-06	HERV_Region
20	20	6.984	Herpesviridae	2.30589e-05	HERV_Region
21	21	1.918	Retroviridae	6.3326e-06	HERV_Region
21	21	5.37	Others	1.773e-05	HERV_Region
22	22	0.929	Others	3.06725e-06	HERV_Region
22	22	10.289	Herpesviridae	3.39709e-05	HERV_Region
22	22	12.654	Retroviridae	4.17793e-05	HERV_Region
22	22	1.831	Poxviridae	6.04536e-06	HERV_Region
23	X	10.988	Retroviridae	3.62787e-05	HERV_Region
23	X	13.373	Poxviridae	4.41532e-05	HERV_Region
23	X	36.745	Herpesviridae	0.00012132	HERV_Region
23	X	8.026	Others	2.64992e-05	HERV_Region
24	Y	4.814	Herpesviridae	1.58942e-05	HERV_Region
24	Y	4.839	Retroviridae	1.59768e-05	HERV_Region
1	1	0.031	Baculoviridae	6.45151e-08	HVIDB_Region
1	1	0.573	Herpesviridae	1.19249e-06	HVIDB_Region
1	1	20.228	Others	4.20971e-05	HVIDB_Region
1	1	2.191	Poxviridae	4.55976e-06	HVIDB_Region
1	1	3.615	Retroviridae	7.52329e-06	HVIDB_Region
2	2	0.513	Herpesviridae	1.06762e-06	HVIDB_Region
2	2	0.562	Poxviridae	1.1696e-06	HVIDB_Region
2	2	1.189	Retroviridae	2.47447e-06	HVIDB_Region
2	2	4.694	Others	9.76883e-06	HVIDB_Region
3	3	0.563	Poxviridae	1.17168e-06	HVIDB_Region
3	3	1.214	Others	2.52649e-06	HVIDB_Region
3	3	1.388	Retroviridae	2.88861e-06	HVIDB_Region
3	3	5.73	Herpesviridae	1.19249e-05	HVIDB_Region
4	4	0.029	Baculoviridae	6.03528e-08	HVIDB_Region
4	4	0.678	Others	1.41101e-06	HVIDB_Region
4	4	0.962	Retroviridae	2.00205e-06	HVIDB_Region
4	4	6.143	Herpesviridae	1.27844e-05	HVIDB_Region
4	4	7.908	Poxviridae	1.64576e-05	HVIDB_Region
5	5	0.984	Herpesviridae	2.04783e-06	HVIDB_Region
5	5	11.897	Retroviridae	2.47592e-05	HVIDB_Region
5	5	1.358	Others	2.82618e-06	HVIDB_Region
5	5	4.232	Poxviridae	8.80735e-06	HVIDB_Region
6	6	0.118	Herpesviridae	2.45574e-07	HVIDB_Region
6	6	0.328	Retroviridae	6.82611e-07	HVIDB_Region
6	6	0.549	Poxviridae	1.14254e-06	HVIDB_Region
6	6	2.567	Others	5.34227e-06	HVIDB_Region
7	7	0.059	Baculoviridae	1.22787e-07	HVIDB_Region
7	7	0.494	Herpesviridae	1.02808e-06	HVIDB_Region
7	7	0.664	Poxviridae	1.38187e-06	HVIDB_Region
7	7	1.059	Others	2.20392e-06	HVIDB_Region
7	7	3.04	Retroviridae	6.32664e-06	HVIDB_Region
8	8	0.264	Baculoviridae	5.49419e-07	HVIDB_Region
8	8	0.267	Poxviridae	5.55662e-07	HVIDB_Region
8	8	1.69	Others	3.51711e-06	HVIDB_Region
8	8	1.936	Retroviridae	4.02907e-06	HVIDB_Region
8	8	4.396	Herpesviridae	9.14866e-06	HVIDB_Region
9	9	0.219	Herpesviridae	4.55768e-07	HVIDB_Region
9	9	0.254	Poxviridae	5.28608e-07	HVIDB_Region
9	9	1.356	Others	2.82202e-06	HVIDB_Region
9	9	2.445	Retroviridae	5.08837e-06	HVIDB_Region
10	10	0.305	Herpesviridae	6.34745e-07	HVIDB_Region
10	10	0.905	Others	1.88342e-06	HVIDB_Region
10	10	5.433	Poxviridae	1.13068e-05	HVIDB_Region
10	10	8.095	Retroviridae	1.68468e-05	HVIDB_Region
11	11	0.613	Poxviridae	1.27573e-06	HVIDB_Region
11	11	0.646	Others	1.34441e-06	HVIDB_Region
11	11	1.231	Herpesviridae	2.56187e-06	HVIDB_Region
11	11	1.393	Retroviridae	2.89902e-06	HVIDB_Region
12	12	0.391	Herpesviridae	8.13723e-07	HVIDB_Region
12	12	0.769	Poxviridae	1.60039e-06	HVIDB_Region
12	12	0.893	Others	1.85845e-06	HVIDB_Region
12	12	1.827	Retroviridae	3.80223e-06	HVIDB_Region
13	13	0.384	Retroviridae	7.99155e-07	HVIDB_Region
13	13	0.832	Poxviridae	1.7315e-06	HVIDB_Region
13	13	42.711	Herpesviridae	8.88872e-05	HVIDB_Region
13	13	6.789	Others	1.41288e-05	HVIDB_Region
14	14	0.378	Poxviridae	7.86668e-07	HVIDB_Region
14	14	1.185	Retroviridae	2.46614e-06	HVIDB_Region
14	14	1.21	Herpesviridae	2.51817e-06	HVIDB_Region
14	14	2.508	Others	5.21948e-06	HVIDB_Region
15	15	0.298	Herpesviridae	6.20177e-07	HVIDB_Region
15	15	0.453	Poxviridae	9.42753e-07	HVIDB_Region
15	15	2.856	Others	5.94371e-06	HVIDB_Region
15	15	4.69	Retroviridae	9.76051e-06	HVIDB_Region
16	16	0.327	Herpesviridae	6.8053e-07	HVIDB_Region
16	16	0.334	Poxviridae	6.95098e-07	HVIDB_Region
16	16	0.864	Others	1.7981e-06	HVIDB_Region
16	16	0.973	Retroviridae	2.02494e-06	HVIDB_Region
17	17	0.331	Poxviridae	6.88855e-07	HVIDB_Region
17	17	0.424	Herpesviridae	8.824e-07	HVIDB_Region
17	17	17.932	Others	3.73189e-05	HVIDB_Region
17	17	2.319	Retroviridae	4.82615e-06	HVIDB_Region
18	18	0.062	Others	1.2903e-07	HVIDB_Region
18	18	0.132	Herpesviridae	2.74709e-07	HVIDB_Region
18	18	0.193	Poxviridae	4.01658e-07	HVIDB_Region
18	18	0.38	Retroviridae	7.9083e-07	HVIDB_Region
19	19	0.597	Poxviridae	1.24244e-06	HVIDB_Region
19	19	7.622	Others	1.58624e-05	HVIDB_Region
19	19	9.758	Herpesviridae	2.03077e-05	HVIDB_Region
20	20	0.351	Poxviridae	7.30477e-07	HVIDB_Region
20	20	0.452	Others	9.40672e-07	HVIDB_Region
20	20	0.967	Retroviridae	2.01245e-06	HVIDB_Region
20	20	1.105	Herpesviridae	2.29965e-06	HVIDB_Region
21	21	0.062	Herpesviridae	1.2903e-07	HVIDB_Region
21	21	0.067	Poxviridae	1.39436e-07	HVIDB_Region
21	21	1.095	Others	2.27884e-06	HVIDB_Region
21	21	1.623	Retroviridae	3.37768e-06	HVIDB_Region
22	22	0.105	Retroviridae	2.18519e-07	HVIDB_Region
22	22	0.162	Poxviridae	3.37143e-07	HVIDB_Region
22	22	0.229	Herpesviridae	4.76579e-07	HVIDB_Region
22	22	0.523	Others	1.08843e-06	HVIDB_Region
23	X	0.409	Herpesviridae	8.51183e-07	HVIDB_Region
23	X	0.417	Retroviridae	8.67832e-07	HVIDB_Region
23	X	1.295	Poxviridae	2.69507e-06	HVIDB_Region
23	X	5.205	Others	1.08323e-05	HVIDB_Region
24	Y	0.029	Herpesviridae	6.03528e-08	HVIDB_Region
24	Y	0.035	Poxviridae	7.28396e-08	HVIDB_Region
Rate=Aligned_Len/(The length of different Class)

[truncated: 9 more sheets: Supplementary Table10, Supplementary Table11, Supplementary Table12, Supplementary Table13, Supplementary Table14, Supplementary Table15, Supplementary Table16, Supplementary Table17,  Supplementary Information]
